# Supplementary material for: The intramolecular amination of allenes
Source: Royal Society of Chemistry journal article supplement (doi:10.1039/b926179f), 2010-01-01

Electronic Supplementary Information

for

**The intramolecular amination of allenes**

George C. Feast, Lee W. Page and Jeremy Robertson\*

\* *Department of Chemistry, University of Oxford, Chemistry Research Laboratory, Mansfield Road, Oxford, UK OX1 3TA; email: jeremy.robertson@chem.ox.ac.uk*

**(1) Details for the single crystal X-ray diffraction experiments**

**(2) Experimental procedures and characterisation data for experiments in Schemes 1, 3 and 4 and Table 1**

**(3)  $^1\text{H}$  NMR and  $^{13}\text{C}$  NMR spectra** [spectra are the machine-generated original PDFs, except that the spectra for **7, 8, 14, 15, 28,** and **29** (obtained at GSK, Harlow, UK) were generated in MestReNova for Mac OS X]

## X-ray details and data summary

Single crystal X-ray diffraction data were obtained using a Nonius Kappa-CCD area detector diffractometer, with graphite-monochromated Mo-K $\alpha$  radiation ( $\lambda = 0.71073 \text{ \AA}$ ) at 150 K. Cell parameters and intensity data were processed using the DENZO-SMN package<sup>1</sup> and reflection intensities were corrected for absorption effects by the multi-scan method, based on multiple scans of identical and Laue equivalent reflections. The structures were solved by direct methods using SIR92<sup>2</sup> and refined by full-matrix least squares on  $F^2$  using the CRYSTALS suite<sup>3</sup> as per the details in the CIF.

Crystal data for Compound **5**: (clear colourless,  $0.14 \times 0.30 \times 0.34 \text{ mm}$ ):  $\text{C}_{10}\text{H}_{17}\text{NO}_5\text{S}$   $M_r = 263.31$ ; monoclinic,  $P2_1/n$ ;  $a = 6.5055(2) \text{ \AA}$ ,  $b = 22.4224(6) \text{ \AA}$ ,  $c = 8.9905(3) \text{ \AA}$ ,  $\beta = 108.6921(10)^\circ$ ,  $V = 1019.55(6) \text{ \AA}^3$ ;  $Z = 4$ ;  $\mu = 0.270 \text{ mm}^{-1}$ ;  $D_{\text{calc}} = 1.408 \text{ g cm}^{-3}$ ; reflections collected = 12353; independent reflections = 2829 ( $R_{\text{int}} = 0.035$ );  $R$  values [ $I > 2\sigma(I)$ , 2141 reflections]:  $R_1 = 0.0391$ ,  $wR_2 = 0.0864$ ;  $\rho_{\text{min/max}} = -0.47/0.41 \text{ e \AA}^{-3}$ ; CCDC 757478. Crystal data for Compound **12**: (clear colourless,  $0.34 \times 0.62 \times 0.64 \text{ mm}$ ):  $\text{C}_{10}\text{H}_{17}\text{NO}_5\text{S}$   $M_r = 263.31$ ; triclinic,  $P\bar{1}$ ;  $a = 7.6562(2) \text{ \AA}$ ,  $b = 8.7683(2) \text{ \AA}$ ,  $c = 10.0293(2) \text{ \AA}$ ,  $\alpha = 77.2922(12)^\circ$ ,  $\beta = 78.9430(12)^\circ$ ,  $\gamma = 69.3572(10)^\circ$ ,  $V = 609.79(2) \text{ \AA}^3$ ;  $Z = 2$ ;  $\mu = 0.275 \text{ mm}^{-1}$ ;  $D_{\text{calc}} = 1.434 \text{ g cm}^{-3}$ ; Reflections collected = 8663; independent reflections = 2766 ( $R_{\text{int}} = 0.021$ );  $R$  values [ $I > 2\sigma(I)$ , 2569 reflections]:  $R_1 = 0.0330$ ,  $wR_2 = 0.0837$ ;  $\rho_{\text{min/max}} = -0.40/0.34 \text{ e \AA}^{-3}$ ; CCDC 757479. Crystal data for Compound **17** were published by Feast *et al.*<sup>4</sup> but are included in the CIF for completeness (CCDC 763606).

Crystallographic data (excluding structure factors) for the structures of **5**, **12** and **17** have been deposited with the Cambridge Crystallographic Data Centre (CCDC 757478-9 & 763606). Copies of these data can be obtained free of charge via [www.ccdc.cam.ac.uk/data\\_request/cif](http://www.ccdc.cam.ac.uk/data_request/cif).

---

<sup>1</sup> Z. Otwinowski and W. Minor, Processing of X-ray Diffraction Data Collected in Oscillation Mode, *Methods Enzymol.* 1997, **276**, eds. C. W. Carter, R. M. Sweet, Academic Press.

<sup>2</sup> A. Altomare, G. Cascarano, C. Giacovazzo, A. Guagliardi, M. C. Burla, G. Polidori and M. Camalli, *J. Appl. Crystallogr.* 1994, **27**, 435.

<sup>3</sup> P. W. Betteridge, J. R. Carruthers, R. I. Cooper, K. Prout and D. J. Watkin, *J. Appl. Crystallogr.* 2003, **36**, 1487.

<sup>4</sup> G. C. Feast, J. Haestier, L. W. Page, J. Robertson, A. L. Thompson and D. J. Watkin, *Acta Cryst.* 2009, **C65**, o635.

## General Procedure A

To a solution of sulfamate (1.0 equiv.) in dichloromethane (20 mL/mmol) was added MgO (2.3 equiv.), rhodium(II) acetate dimer (0.05 equiv.) and iodobenzene diacetate (1.3 equiv.) at RT. After stirring for 18 h, the reaction mixture was filtered through Celite and concentrated *in vacuo* to give the crude product.

### 4-Oxo-1-(sulfamoyloxy)pentan-3-yl acetate 2

The reaction of penta-3,4-dienyl sulfamate (**1**) according to General Procedure A and purification by column chromatography (ether) afforded the *title compound* (63 mg, 35%) as a colourless oil.  $R_f$  0.14 (ether);  $\nu_{\max}$  (thin film)/ $\text{cm}^{-1}$  3627 br, 1726 br, 1564 s, 1374 s, 1244 s;  $\delta_{\text{H}}$  (400 MHz,  $\text{CDCl}_3$ ) 2.19 (3 H, s,  $\text{CH}_3\text{COCH}$ ), 2.21 (3 H, s,  $\text{CH}_3\text{CO}_2$ ), 2.26–2.34 (2 H, m,  $\text{CH}_2\text{CHO}$ ), 4.22–4.33 (2 H, m,  $\text{CH}_2\text{O}$ ), 5.19 (1 H, dd,  $J$  8.3, 4.2,  $\text{CHOAc}$ );  $\delta_{\text{C}}$  (100 MHz,  $\text{CDCl}_3$ ) 20.5, 26.1, 29.5, 66.3, 74.8, 170.7, 205.3; HRMS ( $\text{ESI}^+$ ) found 262.0354,  $\text{C}_7\text{H}_{13}\text{NNaO}_6\text{S}$  ( $\text{MNa}^+$ ) requires 262.0356.

### (E)-4-(2-Methylpropylidene)-2,2-dioxido-1,2,3-oxathiazepan-5-yl acetate 5

The reaction of 6-methylhepta-3,4-dienyl sulfamate (**4**) according to General Procedure A and purification by column chromatography (petrol/ether, 2:1) afforded the *title compound* (382 mg, 52%) as a white crystalline solid.  $R_f$  0.52 (ether); m.p. 87 °C;  $\nu_{\max}$  (thin film)/ $\text{cm}^{-1}$  3272 br, 2965 s, 2872 w, 1743 s, 1467 s, 1418 s, 1375 s;  $\delta_{\text{H}}$  (400 MHz,  $\text{CDCl}_3$ ) 1.04 (3 H, d,  $J$  6.6) and 1.05 (3 H, d,  $J$  6.7,  $\text{Me}_2\text{CH}$ ), 2.10–2.16 (1 H, m,  $\text{CHH}'\text{CH}_2\text{O}$ ) overlays 2.13 (3 H, s,  $\text{CH}_3\text{CO}$ ), 2.20 (1 H, dt,  $J$  11.6, 3.3,  $\text{CHH}'\text{CH}_2\text{O}$ ), 2.59–2.68 (1 H, m,  $\text{Me}_2\text{CH}$ ), 4.25 (1 H, dt,  $J$  12.3, 3.3) and 4.64 (1 H, dt,  $J$  12.3, 1.3,  $\text{CH}_2\text{OS}$ ), 5.77 (1 H, d,  $J$  10.5,  $\text{CH}=\text{}$ ), 5.92 (1 H, t,  $J$  3.4,  $\text{CHOAc}$ ), 6.28 (1 H, br s, NH);  $\delta_{\text{C}}$  (100 MHz,  $\text{CDCl}_3$ ) 21.1, 22.4, 22.6, 27.1, 34.7, 65.1, 66.7, 125.6, 143.0, 169.3; HRMS ( $\text{ESI}^+$ ) found 286.0719,  $\text{C}_{10}\text{H}_{17}\text{NNaO}_5\text{S}$  ( $\text{MNa}^+$ ) requires 286.0720.

### 4-Methyl-2,2-dioxido-5-phenyl-6,7-dihydro-5H-1,2,3-oxathiazepin-5-yl acetate 7

The reaction of 3-phenylpenta-3,4-dienyl sulfamate (**6**) according to General Procedure A and purification by column chromatography (petrol/ether, 2:1) afforded the *title compound* (135 mg, 24%) as a white crystalline solid.  $R_f$  0.32 (ether); m.p. 118 °C;  $\nu_{\max}$  (thin film)/ $\text{cm}^{-1}$  3068 s, 1745 s, 1638 s, 1448 m, 1368 s, 1258 w, 1234 s, 1180 s;  $\delta_{\text{H}}$  (500 MHz,  $\text{CDCl}_3$ ) 2.07 (1 H, ddd,  $J$  14.8, 4.1, 1.1,  $\text{CHH}'\text{CH}_2\text{O}$ ), 2.20 (3 H, s,  $\text{CH}_3\text{CO}$ ), 2.24 (3 H, s,  $\text{CH}_3\text{C}=\text{N}$ ), 3.43–3.51 (1 H, m,  $\text{CHH}'\text{O}$ ), 4.06–4.15 (1 H, m,  $\text{CHH}'\text{CH}_2\text{O}$ ), 4.30 (1 H, dd,  $J$  11.0, 5.9,  $\text{CHH}'\text{O}$ ), 7.37 (2 H, dd,  $J$  7.7, 1.9) and 7.45–7.48 (3 H, m, Ph);  $\delta_{\text{C}}$  (100 MHz,  $\text{CDCl}_3$ ) 21.3, 25.2, 36.7, 65.2, 88.4, 125.9, 129.3, 129.8, 133.6, 169.8, 181.4; HRMS ( $\text{ESI}^+$ ) found 320.0558,  $\text{C}_{13}\text{H}_{15}\text{NNaO}_5\text{S}$  ( $\text{MNa}^+$ ) requires 320.0563. Also obtained was (**2,2-dioxido-5-phenyl-6,7-dihydro-3H-1,2,3-oxathiazepin-4-yl)methyl acetate (8)** (26 mg, 5%) as a yellow solid.  $R_f$  0.49 (ether);  $\nu_{\max}$  (thin film)/ $\text{cm}^{-1}$  3377 br, 2919s, 2850 m, 1738 s, 1659 w, 1443 m, 1411 s;  $\delta_{\text{H}}$  (400 MHz,  $\text{CDCl}_3$ ) 2.11 (3 H, s,  $\text{CH}_3$ ), 3.00 (2 H, t,  $J$  5.0,  $\text{CH}_2\text{CH}_2\text{O}$ ), 4.51 (2 H, app. tt,  $J$  3.5, 1.5,  $\text{CH}_2\text{O}$ ), 4.55 (2 H, s,  $\text{CH}_2\text{OAc}$ ), 7.20–7.22 (2 H, m) and 7.34–7.41 (3 H, m, Ph);  $\delta_{\text{C}}$  (100 MHz,  $\text{CDCl}_3$ ) 20.8, 36.4, 63.1, 70.5, 128.0, 128.3, 128.6, 128.8, 135.9, 139.4, 171.4; HRMS ( $\text{ESI}^+$ ) found 320.0560,  $\text{C}_{13}\text{H}_{15}\text{NNaO}_5\text{S}$  ( $\text{MNa}^+$ ) requires 320.0563.

### 7-Methyl-3,3-dioxido-4-oxa-3-thia-2-azabicyclo[5.1.0]oct-1-yl acetate 10

The reaction of 3-methylpenta-3,4-dienyl sulfamate (**9**) according to General Procedure A and purification by column chromatography (petrol/ether, 2:1) afforded the *title compound* (236 mg, 49%) as a white crystalline solid.  $R_f$  0.21 (petrol/ether, 2:1); m.p. 91 °C;  $\nu_{\max}$  (thin film)/ $\text{cm}^{-1}$  3303 br, 2973 s, 2922 s, 2865 m, 1741 m, 1455 m, 1423 s, 1345 s;  $\delta_{\text{H}}$  (400 MHz,  $\text{CDCl}_3$ ) 1.03 (1 H, d,  $J$  6.6,  $\text{CHH}'\text{C}(\text{OAc})$ ), 1.35 (3 H, s,  $\text{CH}_3\text{C}(\text{CH}_2)$ ), 1.38 (1 H, d,  $J$  6.6,  $\text{CHH}'\text{C}(\text{OAc})$ ), 1.93 (1 H, ddd,  $J$  16.0, 12.0, 2.0,  $\text{CHH}'\text{CH}_2\text{O}$ ), 2.10 (3 H, s,  $\text{CH}_3\text{CO}$ ), 2.29 (1 H, dd,  $J$  16.0, 4.6,  $\text{CHH}'\text{CH}_2\text{O}$ ), 4.26 (1 H, ddd,  $J$  12.0, 4.6, 2.0) and 4.67 (1 H, app. t,  $J$  12.0,  $\text{CH}_2\text{O}$ ), 6.75 (1 H, br s, NH);  $\delta_{\text{C}}$  (100 MHz,  $\text{CDCl}_3$ ) 17.7, 21.2, 27.6, 31.1, 38.7, 69.2, 77.2, 171.6; HRMS ( $\text{ESI}^+$ ) found 258.0407,  $\text{C}_8\text{H}_{13}\text{NNaO}_5\text{S}$  ( $\text{MNa}^+$ ) requires 258.0407.

### 7-Propyl-3,3-dioxido-4-oxa-3-thia-2-azabicyclo[5.1.0]oct-1-yl acetate 12

The reaction of 3-(vinylidene)hexyl sulfamate (**11**) according to General Procedure A and purification by column chromatography (petrol/ether, 1:1) afforded the *title compound* (167 mg, 40%) as a white crystalline solid.  $R_f$  0.42 (ether); m.p. 79 °C;  $\nu_{\max}$  (thin film)/ $\text{cm}^{-1}$  3260 br, 2962 s, 1740 s, 1510 m, 1363 m, 1211 s, 1191 s;  $\delta_{\text{H}}$  (400 MHz,  $\text{CDCl}_3$ ) 0.95 (3 H, t,  $J$  7.3  $\text{CH}_3\text{CH}_2$ ), 1.02 (1 H, d,  $J$  6.6) and 1.34 (1 H, d,  $J$  6.6,  $\text{CHH}'\text{C}(\text{OAc})$ ), 1.30–1.48 (2 H, m,  $\text{CHH}'\text{Et}$  overlays  $\text{CHH}'\text{CH}_3$ ), 1.52–1.63 (1 H, m,  $\text{CHH}'\text{CH}_3$ ), 1.70 (1 H, ddd,  $J$  11.1, 4.3, 3.0,  $\text{CHH}'\text{Et}$ ), 1.80 (1 H, dd,  $J$  16.0, 11.2,  $\text{CHH}'\text{CH}_2\text{O}$ ), 2.11 (3 H, s,  $\text{CH}_3\text{CO}$ ), 2.42 (1 H, dd,  $J$  16.0, 4.8,  $\text{CHH}'\text{CH}_2\text{O}$ ), 4.24 (1 H, ddd,  $J$  12.0, 4.8, 2.0) and 4.64 (1 H, app. t,  $J$  12.0,  $\text{CH}_2\text{O}$ ), 6.72 (1 H, br s, NH);  $\delta_{\text{C}}$  (100 MHz,  $\text{CDCl}_3$ ) 14.2, 19.8, 21.2, 30.2, 31.7, 32.4, 35.4, 69.5, 69.6, 171.6; HRMS (FI) found 263.0820,  $\text{C}_{10}\text{H}_{17}\text{NO}_5\text{S}$  ( $\text{M}^+$ ) requires 263.0827.

### 7-(1-Methylethyl)-4-oxa-3-thia-2-azabicyclo[5.1.0]octan-1-ol 3,3-dioxide 14

The reaction of 3-isopropylpenta-3,4-dienyl sulfamate (**13**) according to General Procedure A and purification by column chromatography (dichloromethane/ethyl acetate, 20:1) afforded the *title compound* (184 mg, 20%) as a white crystalline solid.  $R_f$  0.20 (petrol/ethyl acetate, 2:1); m.p. 167 °C;  $\nu_{\max}$  (thin film)/ $\text{cm}^{-1}$  3455 s, 3211 br, 2958 m, 1466 w, 1416 s, 1366 s, 1321 m, 1262 s, 1202 s, 1169 s;  $\delta_{\text{H}}$  (400 MHz,  $\text{CDCl}_3$ ) 0.88 (1 H, d,  $J$  5.7) and 0.92 (1 H, d,  $J$  5.7,  $\text{CHH}'\text{C}(\text{OAc})$ ), 1.01

(3 H, d, *J* 7.0) and 1.14 (3 H, d, *J* 7.0,  $Me_2CH$ ), 1.68 (1 H, dddd, *J* 16.5, 11.6, 2.0, 0.4,  $CHH'CH_2O$ ), 1.79 (1 H, dsept, *J* 7.0, 0.4,  $Me_2CH$ ), 2.48 (1 H, dd, *J* 16.5, 4.6,  $CHH'CH_2O$ ), 3.62 (1 H, br s, OH), 4.25 (1 H, ddd, *J* 12.3, 4.6, 2.0) and 4.69 (1 H, ddd, *J* 12.3, 11.6, 0.4,  $CH_2O$ ), 6.05 (1 H, br s, NH);  $\delta_C$  (100 MHz,  $CDCl_3$ ) 19.5, 20.5, 30.5, 31.0, 32.0, 37.8, 70.6, 71.6; HRMS (ESI<sup>+</sup>) found 244.0612,  $C_8H_{15}NNaO_4S$  ( $MNa^+$ ) requires 244.0614. Also obtained was **[5-(1-methyl)-2,2-dioxido-6,7-dihydro-3H-1,2,3-oxathiazepin-4-yl]methyl acetate (15)** (137 mg, 12%) as a white crystalline solid.  $R_f$  0.24 (petrol/ethyl acetate, 2:1);  $\nu_{max}$  (thin film)/ $cm^{-1}$  3248 br, 2965 s, 1737 s, 1420 m, 1364 s, 1173 s;  $\delta_H$  (400 MHz,  $CDCl_3$ ) 1.02 (6 H, d, *J* 6.8,  $Me_2CH$ ), 2.09 (3 H, s,  $CH_3CO$ ), 2.56–2.59 (2 H, m,  $CH_2CH_2O$ ), 2.96 (1 H, sept, *J* 6.8,  $Me_2CH$ ), 4.33–4.36 (2 H, m,  $CH_2O$ ), 4.68 (2 H, s,  $CH_2OAc$ ), 6.39 (1 H, br s, NH);  $\delta_C$  (100 MHz,  $CDCl_3$ ) 20.1, 20.8, 27.8, 30.2, 62.2, 70.8, 125.8, 142.6, 171.4; HRMS (ESI<sup>-</sup>) found 262.0748,  $C_{10}H_{16}NO_5S$  ( $M-H$ )<sup>-</sup> requires 262.0755.

#### **6-(tert-Butyl)-3-oxa-2-thia-1-azabicyclo[5.1.0]oct-6-ene 2,2-dioxide 17**

The reaction of 3-*tert*-butylpenta-3,4-dienyl sulfamate (**16**) according to General Procedure A and purification by column chromatography (petrol/ether, 4:1) afforded the *title compound* (160 mg, 68%) as a white crystalline solid;  $R_f$  0.26 (petrol/ether, 2:1); m.p. 58 °C;  $\nu_{max}$  (thin film)/ $cm^{-1}$  3075m, 2968s, 1468m, 1359s, 1296w, 1261w, 1183s;  $\delta_H$  (500 MHz,  $CD_2Cl_2$ , 228K) 1.11 (9H, s,  $(CH_3)_3C$ ), 2.39 (1H, d, *J* 14.3,  $OCH_2CHH'$ ), 2.90 (1H, app. t, 14.3,  $(OCH_2CHH')$ ), 3.45 (1H, br s,  $NCHH'$ ), 3.53 (1H, br s,  $NCHH'$ ), 4.48–4.57 (2H, m,  $OCH_2$ );  $\delta_C$  (100 MHz,  $CDCl_3$ ) 27.9, 28.0, 35.3, 40.2, 75.3, 114.9, 126.4; HRMS (ESI<sup>+</sup>) found 240.0670,  $C_9H_{15}NNaO_3S$  ( $MNa^+$ ) requires 240.0665. Also obtained was **6-(tert-butyl)-7-methylidene-3-oxa-2-thia-1-azabicyclo[4.1.0]heptane 2,2-dioxide (18)** (31 mg, 13%).  $R_f$  0.26 (petrol/ether, 2:1);  $\nu_{max}$  (thin film)/ $cm^{-1}$  3298 br, 2972 s, 2875 m, 1754 s, 1626 m, 1468 s, 1371 s, 1187 s;  $\delta_H$  (500 MHz,  $CDCl_3$ ) 1.06 (9 H, s,  $(CH_3)_3C$ ), 2.11 (1 H, dt, *J* 15.2, 3.4) and 2.49 (1 H, ddd, 15.2, 10.8, 5.3,  $CH_2CH_2O$ ), 4.36 (1 H, ddd, *J* 12.0, 10.8, 3.4) and 4.43 (1 H, ddd, *J* 12.0, 5.3, 3.4,  $CH_2O$ ), 5.04 and 5.36 (2 × 1 H, 2 × d, *J* 2.8,  $CH_2=$ );  $\delta_C$  (125 MHz,  $CDCl_3$ ) 21.3, 25.5, 34.9, 66.7, 67.3, 90.0, 133.2; HRMS (ESI<sup>+</sup>) found 240.0661,  $C_9H_{15}NNaO_3S$  ( $MNa^+$ ) requires 240.0665.

#### **(1S\*,7S\*,8S\*)-7-Ethyl-8-methyl-3,3-dioxido-4-oxa-3-thia-2-azabicyclo[5.1.0]octan-1-yl acetate 20**

The reaction of 3-ethylhexa-3,4-dienyl sulfamate (**19**) according to General Procedure A and purification by column chromatography (petrol/ether, 2:1) afforded the *title compound* (170 mg, 26%) as a white crystalline solid.  $R_f$  0.38 (ether); m.p. 104 °C;  $\nu_{max}$  (thin film)/ $cm^{-1}$  3299 br, 2975 s, 1741 s, 1411 s, 1357 s, 1256 m, 1189 s;  $\delta_H$  (500 MHz,  $CDCl_3$ ) 0.99 (3 H, d, *J* 6.5,  $CH_3CH$ ), 1.00 (3 H, t, *J* 7.6  $CH_3CH_2$ ), 1.40 (1 H, q, *J* 6.5,  $CHC(OAc)$ ), 1.50–1.58 (1 H, m,  $CHH'CH_3$ ), 1.65–1.75 (2 H, m,  $CHH'CH_2O$  overlays  $CHH'CH_3$ ), 2.13 (3 H, s,  $CH_3CO$ ), 2.50 (1 H, dd, *J* 16.2, 4.6,  $CHH'CH_2O$ ), 4.23 (1 H, ddd, *J* 12.0, 4.6, 2.0) and 4.63 (1 H, app. t, *J* 12.0,  $CH_2O$ ), 6.64 (1 H, br s, NH);  $\delta_C$  (125 MHz,  $CDCl_3$ ) 8.1, 10.2, 18.4, 20.9, 33.2, 33.4, 36.0, 69.2, 71.8, 171.5; HRMS (ESI<sup>+</sup>) found 286.0716,  $C_{10}H_{17}NNaO_5S$  ( $MNa^+$ ) requires 286.0720. Also obtained was **1-(5-ethyl-2,2-dioxido-6,7-dihydro-3H-1,2,3-oxathiazepin-4-yl)ethyl acetate (21)** (180 mg, 28%) as a white crystalline solid.  $R_f$  0.30 (ether);  $\nu_{max}$  (thin film)/ $cm^{-1}$  3281 br, 2975 s, 2259 s, 1734 s, 1371 s;  $\delta_H$  (500 MHz,  $CDCl_3$ ) 1.04 (3 H, t, *J* 7.6,  $CH_3CH_2$ ), 1.40 (3 H, d, *J* 6.6,  $CH_3CH$ ), 2.05 (3 H, s,  $CH_3CO$ ), 2.13–2.19 (1 H, m) and 2.25–2.32 (1 H, m,  $CH_2CH_3$ ), 2.48 (1 H, ddd, *J* 16.2, 6.8, 1.7) and 2.74 (1 H, ddd, *J* 16.2, 8.4, 2.7,  $CH_2CH_2O$ ), 4.34–4.42 (2 H, m,  $CH_2O$ ), 5.74 (1 H, q, *J* 6.7,  $CHOAc$ ), 6.23 (1 H, br s, NH);  $\delta_C$  (125 MHz,  $CDCl_3$ ) 12.3, 18.4, 21.1, 26.9, 33.7, 36.4, 70.5, 128.6, 136.2, 169.9; HRMS (ESI<sup>+</sup>) found 286.0717,  $C_{10}H_{17}NNaO_5S$  ( $MNa^+$ ) requires 286.0720.

#### **7-(tert-Butyl)-4-oxa-3-thia-2-azabicyclo[5.1.0]octan-1-ol 3,3-dioxide 26**

To a stirred solution of methylene aziridine **17** (47 mg, 0.210 mmol) in DMF (1.5 mL) was added NaI (32 mg, 0.210 mmol) at RT. After 20 h the reaction was quenched with sat. aq.  $NH_4Cl$  solution (5 mL) and the mixture was extracted with ether (3 × 20 mL). The combined extracts were washed with brine (10 mL), dried over  $MgSO_4$  and concentrated *in vacuo*. Column chromatography (petrol/ether, 2:1) afforded the *title compound* as a white crystalline solid (20 mg, 41%).  $R_f$  0.12 (petrol/ethyl acetate, 2:1); m.p. 132 °C;  $\nu_{max}$  (thin film)/ $cm^{-1}$  3460 s, 3180 br, 2958 s, 1457 s, 1265 s, 1144 s;  $\delta_H$  (400 MHz,  $CDCl_3$ ) 0.75 (1 H, d, *J* 6.2,  $CHH'C(OH)$ ), 1.12 (9 H, s,  $(CH_3)_3C$ ), 1.47 (1 H, d, *J* 6.2,  $CHH'C(OH)$ ), 1.67 (1 H, ddd, *J* 17.0, 11.2, 1.6) and 2.69 (1 H, dd, *J* 17.0, 5.3,  $CH_2CH_2O$ ), 3.61 (1 H, br s, OH), 4.27 (1 H, ddd, *J* 12.3, 5.3, 1.6) and 4.76 (1 H, app. t, *J* 11.8,  $CH_2O$ ), 6.05 (1 H, br s, NH);  $\delta_C$  (100 MHz,  $CDCl_3$ ) 26.7, 29.8, 34.1, 36.3, 40.1, 71.1, 71.8; HRMS (ESI<sup>+</sup>) found 258.0769,  $C_9H_{17}NNaO_4S$  ( $MNa^+$ ) requires 258.0770.

#### **7-Methyl-4-oxa-3-thia-2-azabicyclo[5.1.0]octane 3,3-dioxide 27**

To a stirred solution of cyclopropane **10** (78 mg, 0.33 mmol) in isopropanol (2 mL) was added  $NaBH_4$  (50 mg, 1.32 mmol) at 0 °C and the reaction mixture was allowed to warm to RT. After 20 h the reaction was quenched with water (5 mL) and extracted with dichloromethane (3 × 20 mL). The combined organic extracts were washed with brine (10 mL), dried over  $MgSO_4$  and concentrated *in vacuo*. Column chromatography (petrol/ethyl acetate, 4:1) afforded the *title compound* as a white solid (36 mg, 62%).  $R_f$  0.28 (petrol/ethyl acetate, 2:1); m.p. 91 °C;  $\nu_{max}$  (thin film)/ $cm^{-1}$  3300 br, 2961 s, 1338 s, 1163 s;  $\delta_H$  (500 MHz,  $CDCl_3$ ) 0.83 (1 H, dd, *J* 5.5, 3.7) and 0.93 (1 H, dd, *J* 7.3, 5.5,  $CH_2CH$ ), 1.17 (3 H, s,  $CH_3$ ), 2.00 (1 H, ddd, *J* 16.2, 11.2, 1.4) and 2.21 (1 H, dd, *J* 16.2, 4.7,  $CH_2CH_2O$ ), 2.45 (1 H, ddd, *J* 7.3, 3.7, 2.0,  $CHNH$ ), 4.20 (1 H, ddd, *J* 12.3, 4.7, 1.4) and 4.69 (1 H, app. t, *J* 11.7,  $CH_2O$ ), 5.16 (1 H, br s, NH);  $\delta_C$  (125 MHz,  $CDCl_3$ ) 22.2, 24.2, 24.7, 34.9, 37.8, 69.8; *m/z* (CI) 195 ( $MNH_4^+$ , 100%); HRMS (CI) found 195.0795,  $C_6H_{15}NO_3S$  ( $MNH_4^+$ ) requires 195.0803.

### 7-Methyl-4-oxa-3-thia-2-azabicyclo[5.1.0]octan-1-ol 3,3-dioxide 28

To a solution of cyclopropane **10** (45 mg, 0.191 mmol) in ether (6 mL) at RT was added LiAlH<sub>4</sub> (22 mg, 0.574 mmol) and the mixture was stirred for 1 h. The reaction was quenched by the addition of water (10 mL) and acidified with 1 M hydrochloric acid (5 mL). The mixture was extracted with ether (3 × 20 mL) and the combined organic extracts were washed with brine (10 mL), dried over MgSO<sub>4</sub> and concentrated *in vacuo*. Purification by column chromatography (petrol/ethyl acetate, 3:1) afforded the *title compound* as a white solid (28 mg, 76%). *R<sub>f</sub>* 0.34 (petrol/ethyl acetate, 2:1); m.p. 92 °C;  $\nu_{\max}$  (thin film)/cm<sup>-1</sup> 3259 br, 2961 s, 1710 w, 1421 s, 1266 s, 1120 s, 1160 s;  $\delta_{\text{H}}$  (400 MHz, CDCl<sub>3</sub>) 0.99 (1 H, d, *J* 6.6) and 1.06 (1 H, d, *J* 6.6, CH<sub>2</sub>C(OH)), 1.30 (3 H, s, CH<sub>3</sub>), 1.86 (1 H, ddd, *J* 16.2, 11.6, 1.5) and 2.26 (1 H, dd, *J* 16.2, 4.6, CH<sub>2</sub>CH<sub>2</sub>O), 3.72 (1 H, br s, OH), 4.25 (1 H, ddd, *J* 11.8, 4.6, 1.5) and 4.63 (1 H, app. t, *J* 11.8, CH<sub>2</sub>O), 6.14 (1 H, br s, NH);  $\delta_{\text{C}}$  (100 MHz, CDCl<sub>3</sub>) 17.2, 29.2, 29.4, 38.7, 68.5, 69.8; HRMS (ESI<sup>+</sup>) found 216.0300, C<sub>6</sub>H<sub>11</sub>NNaO<sub>4</sub>S (MNa<sup>+</sup>) requires 216.0301.

### 1-(Ethoxy)-7-methyl-4-oxa-3-thia-2-azabicyclo[5.1.0]octane 3,3-dioxide 29

To a stirred solution of cyclopropane **10** (43 mg, 0.183 mmol) in ethanol (15 mL) at RT was added NaOH (146 mg, 3.66 mmol); after 30 min TLC analysis showed the reaction to be complete. The reaction mixture was diluted with water (20 mL), acidified with 1 M hydrochloric acid and extracted with dichloromethane (3 × 30 mL). The combined extracts were dried over Na<sub>2</sub>SO<sub>4</sub> and concentrated *in vacuo*. Purification by column chromatography (petrol/ethyl acetate, 2:1) afforded the *title compound* as a white crystalline solid (33 mg, 82%). *R<sub>f</sub>* 0.15 (petrol/ethyl acetate, 2:1); m.p. 126 °C;  $\nu_{\max}$  (thin film)/cm<sup>-1</sup> 3708 br, 2981 s, 2844 m, 1417 m, 1370 s, 1213 m, 1166 m;  $\delta_{\text{H}}$  (400 MHz, CDCl<sub>3</sub>) 0.89 (1 H, d, *J* 5.7) and 0.92 (1 H, d, *J* 5.7, CH<sub>2</sub>C(OEt)), 1.23 (3 H, t, *J* 7.0, CH<sub>3</sub>CH<sub>2</sub>), 1.32 (3 H, s, CH<sub>3</sub>C), 1.87 (1 H, ddd, *J* 16.2, 11.0, 2.0) and 2.29 (1 H, ddd, *J* 16.2, 5.0, 1.1, CH<sub>2</sub>CH<sub>2</sub>O), 3.41 (1 H, dq, *J* 9.0, 7.0) and 3.84 (1 H, dq, *J* 9.0, 7.0, CH<sub>2</sub>CH<sub>3</sub>), 4.21 (1 H, ddd, *J* 12.3, 5.0, 2.0) and 4.64 (1 H, ddd, *J* 12.0, 11.0, 1.1, CH<sub>2</sub>O), 5.93 (1 H, br s, NH);  $\delta_{\text{C}}$  (100 MHz, CDCl<sub>3</sub>) 15.1, 18.0, 29.2, 30.9, 39.1, 61.9, 69.2, 72.8; HRMS (ESI<sup>+</sup>) found 244.0615, C<sub>8</sub>H<sub>15</sub>NNaO<sub>4</sub>S (MNa<sup>+</sup>) requires 244.0614.

### 1-Ethyl-7-methyl-4-oxa-3-thia-2-azabicyclo[5.1.0]octane 3,3-dioxide 30

To a stirred solution of cyclopropane **10** (70 mg, 0.297 mmol) in THF (10 mL) at 0 °C was added ethylmagnesium bromide (0.89 mL of a 1.0 M solution in THF, 0.89 mmol). The reaction mixture was allowed to warm to RT and stirring was continued for 20 h. The reaction was quenched with sat. aq. NH<sub>4</sub>Cl solution (10 mL) and extracted with ether (3 × 20 mL). The combined organic extracts were washed with brine (10 mL), dried over MgSO<sub>4</sub> and concentrated *in vacuo*. Purification by column chromatography (petrol/ethyl acetate, 5:1) afforded the *title compound* as a white crystalline solid (42 mg, 68%). *R<sub>f</sub>* 0.48 (petrol/ethyl acetate, 2:1); m.p. 88 °C;  $\nu_{\max}$  (thin film)/cm<sup>-1</sup> 3299 br, 2962 s, 1421 s, 1332 s, 1164 s, 1105 m;  $\delta_{\text{H}}$  (500 MHz, CDCl<sub>3</sub>) 0.57 (1 H, d, *J* 5.5) and 0.80 (1 H, dd, *J* 5.5, 1.9, CH<sub>2</sub>C(Et)), 0.94–1.01 (1 H, m, CHH'CH<sub>3</sub>), 1.04 (3 H, t, *J* 6.9, CH<sub>3</sub>CH<sub>2</sub>), 1.24 (3 H, s, CH<sub>3</sub>C), 2.03 (1 H, ddd, *J* 16.1, 11.0, 1.6) and 2.27 (1 H, dd, *J* 16.1, 4.7, CH<sub>2</sub>CH<sub>2</sub>O), 2.34–2.42 (1 H, m, CHH'CH<sub>3</sub>), 4.19 (1 H, ddd, *J* 12.0, 4.7, 1.6) and 4.57 (1 H, dd, *J* 12.0, 11.0, CH<sub>2</sub>O), 5.13 (1 H, br s, NH);  $\delta_{\text{C}}$  (125 MHz, CDCl<sub>3</sub>) 10.0, 19.3, 25.7, 29.3, 29.8, 40.5, 44.0, 69.0; HRMS (ESI<sup>+</sup>) found 228.0667, C<sub>8</sub>H<sub>15</sub>NNaO<sub>3</sub>S (MNa<sup>+</sup>) requires 228.0665.

### Ethyl 2-(7-methyl-3,3-dioxido-4-oxa-3-thia-2-azabicyclo[5.1.0]octan-1-yl)-3-oxobutanoate 31

To a stirred solution of ethyl acetoacetate (28 mg, 0.212 mmol) in THF (2 mL) at 0 °C was added NaH (9 mg of a 60% suspension in mineral oil, 0.212 mmol). After 15 min cyclopropane **10** (30 mg, 0.106 mmol) was added and the solution was allowed to warm to RT and stirred for 18 h. The reaction was quenched with water (2 mL), acidified with 1 M hydrochloric acid (0.5 mL) and extracted with ether (3 × 5 mL). The combined organic extracts were dried over MgSO<sub>4</sub> and concentrated *in vacuo*. Purification by column chromatography (petrol/ether, 1:1) afforded the *title compound* as a mixture of inseparable diastereomers A and B (26 mg, 77%, A:B = 2.4:1). *R<sub>f</sub>* 0.16 (petrol/ether, 1:1);  $\nu_{\max}$  (thin film)/cm<sup>-1</sup> 3301 br, 2983 s, 1716 s, 1619 m, 1414 s, 1178 s;  $\delta_{\text{H}}$  (400 MHz, CDCl<sub>3</sub>) 0.69 (1 H, d, *J* 6.9, CHH'C(EAA), A), 0.88 (1 H, d, *J* 6.6, CHH'C(EAA), B), 1.29 (3 H, s, CH<sub>3</sub>C, B), 1.29 (3 H, s, CH<sub>3</sub>C, A), 1.30 (3 H, t, *J* 7.1, CH<sub>3</sub>CH<sub>2</sub>, B), 1.31 (3 H, t, *J* 7.1, CH<sub>3</sub>CH<sub>2</sub>, A), 1.47 (1 H, d, *J* 6.6, CHH'C(EAA), B), 1.74 (1 H, d, *J* 6.9, CHH'C(EAA), A), 2.06–2.13 (1 H, m, CHH'CH<sub>2</sub>O, A & B), 2.29 (3 H, d, *J* 1.0, CH<sub>3</sub>CO, A), 2.33 (3 H, d, *J* 1.0, CH<sub>3</sub>CO, B), 2.41 (1 H, dd, *J* 16.4, 8.7, CHH'CH<sub>2</sub>O, A & B), 3.26 (1 H, d, *J* 1.0, CHCOCH<sub>3</sub>, A), 3.64 (1 H, br s, CHCOCH<sub>3</sub>, B), 4.07–4.15 (1 H, m, CHH'O, A & B), 4.19–4.28 (2 H, m, CH<sub>2</sub>CH<sub>3</sub>, A & B), 4.33–4.38 (1 H, m, CHH'O, A & B), 6.08 (1 H, br s, NH, B), 6.12 (1 H, br s, NH, A);  $\delta_{\text{C}}$  (100 MHz, CDCl<sub>3</sub>) data for A: 13.9, 22.0, 24.9, 28.7, 29.4, 37.1, 41.9, 62.1, 63.5, 67.2, 168.6, 202.4; HRMS (ESI<sup>+</sup>) found 328.0822, C<sub>12</sub>H<sub>19</sub>NNaO<sub>6</sub>S (MNa<sup>+</sup>) requires 328.0825.

### Diethyl 2-(7-methyl-3,3-dioxido-4-oxa-3-thia-2-azabicyclo[5.1.0]octan-1-yl)malonate 32

To a stirred solution of diethyl malonate (37 mg, 0.230 mmol) in THF (2 mL) at 0 °C was added NaH (9 mg of a 60% suspension in mineral oil, 0.230 mmol). After 15 min cyclopropane **10** (27 mg, 0.114 mmol) was added and the solution was allowed to warm to RT and stirred for 18 h. The reaction was quenched with water (2 mL), acidified with 1M hydrochloric acid (0.5 mL) and extracted with ether (3 × 5 mL). The combined extracts were dried over MgSO<sub>4</sub> and concentrated *in vacuo*. Purification by column chromatography (petrol/ether, 2:1) afforded the *title compound* as a

colourless oil (25 mg, 65%).  $R_f$  0.20 (petrol/ether, 1:1);  $\nu_{\max}$  (thin film)/ $\text{cm}^{-1}$  3313 br, 2984 s, 1729 s, 1391 s, 1369 s, 1313 s, 1238 s, 1175 s;  $\delta_{\text{H}}$  (500 MHz,  $\text{CDCl}_3$ ) 0.71 (1 H, d,  $J$  6.3,  $\text{CHH}'\text{C}(\text{DEM})$ ), 1.30 (6 H, 2  $\times$  d,  $J$  7.1, 2  $\times$   $\text{CH}_3\text{CH}_2$ ), 1.36 (1 H, app. s,  $\text{CHH}'\text{C}(\text{DEM})$ ), 1.37 (3 H, s,  $\text{CH}_3\text{C}$ ), 2.11 (1 H, ddd,  $J$  16.2, 8.8, 1.1) and 2.43 (1 H, ddd,  $J$  16.2, 7.6, 1.0  $\text{CH}_2\text{CH}_2\text{O}$ ), 3.24 (1 H, s,  $\text{CH}(\text{CO}_2\text{Et})_2$ ), 4.12 (1 H, ddd,  $J$  12.3, 7.6, 1.3,  $\text{CHH}'\text{O}$ ), 4.19–4.42 (2 H, m) and 4.26–4.31 (2 H, m, 2  $\times$   $\text{CH}_2\text{CH}_3$ ), 4.43 (1 H, ddd,  $J$  12.3, 8.8, 1.1,  $\text{CHH}'\text{O}$ ), 6.24 (1 H, br s, NH);  $\delta_{\text{C}}$  (100 MHz,  $\text{CDCl}_3$ ) 13.8, 21.5, 27.2, 29.4, 38.5, 41.9, 56.1, 61.8, 67.7, 167.1, 168.7; HRMS (ESI<sup>+</sup>) found 358.0925,  $\text{C}_{13}\text{H}_{21}\text{NNaO}_7\text{S}$  ( $\text{MNa}^+$ ) requires 358.0931.

Instrument DQX400  
Chemist GCF  
Group JR  
3-06  
h1acq.au CDCI3 {C:\NMR} jrgpr 55

NMR@CHEM.OX

848.6  
851.1  
853.5  
856.2  
857.0  
857.7  
862.6  
863.7  
866.1  
869.4  
872.5  
876.9  
882.7  
885.8  
890.6  
896.3  
899.7  
905.2  
909.6  
910.6  
912.8  
914.9  
917.1  
918.1  
920.3  
922.4  
924.7  
925.8  
927.8  
930.0  
932.1  
933.2  
937.6  
941.5  
943.1  
946.5  
948.4  
949.4  
953.4  
1699.4  
1704.2  
1706.9  
1709.6  
1711.9  
1714.4  
1715.9  
1717.1  
1721.7  
1727.2  
1731.8  
1733.8  
1737.4  
1922.8  
1940.1  
1964.6  
1981.9  
2071.0  
2075.3  
2079.3  
2083.6  
2116.6  
2125.2  
2130.0  
2132.3  
2137.2  
2139.7  
2151.8  
2909.3  
3271.1

Current Data Parameters  
NAME Aug13-2008-55  
EXPNO 1  
PROCNO 1

F2 - Acquisition Parameters  
Date\_ 20080813  
Time 22.14  
INSTRUM av400  
PROBHD 5 mm QNP 1H/13  
PULPROG zg60  
TD 65536  
SOLVENT CDCI3  
NS 16  
DS 2  
SWH 8278.146 Hz  
FIDRES 0.126314 Hz  
AQ 3.9584243 sec  
RG 90.5  
DW 60.400 usec  
DE 7.50 usec  
TE 300.0 K  
D1 1.0000000 sec

==== CHANNEL f1 =====  
NUC1 1H  
P1 9.00 usec  
PL1 0.00 dB  
SFO1 400.2024714 MHz

F2 - Processing parameters  
SI 32768  
SF 400.2000028 MHz  
WDW EM  
SSB 0  
LB 0.30 Hz  
GB 0  
PC 1.00

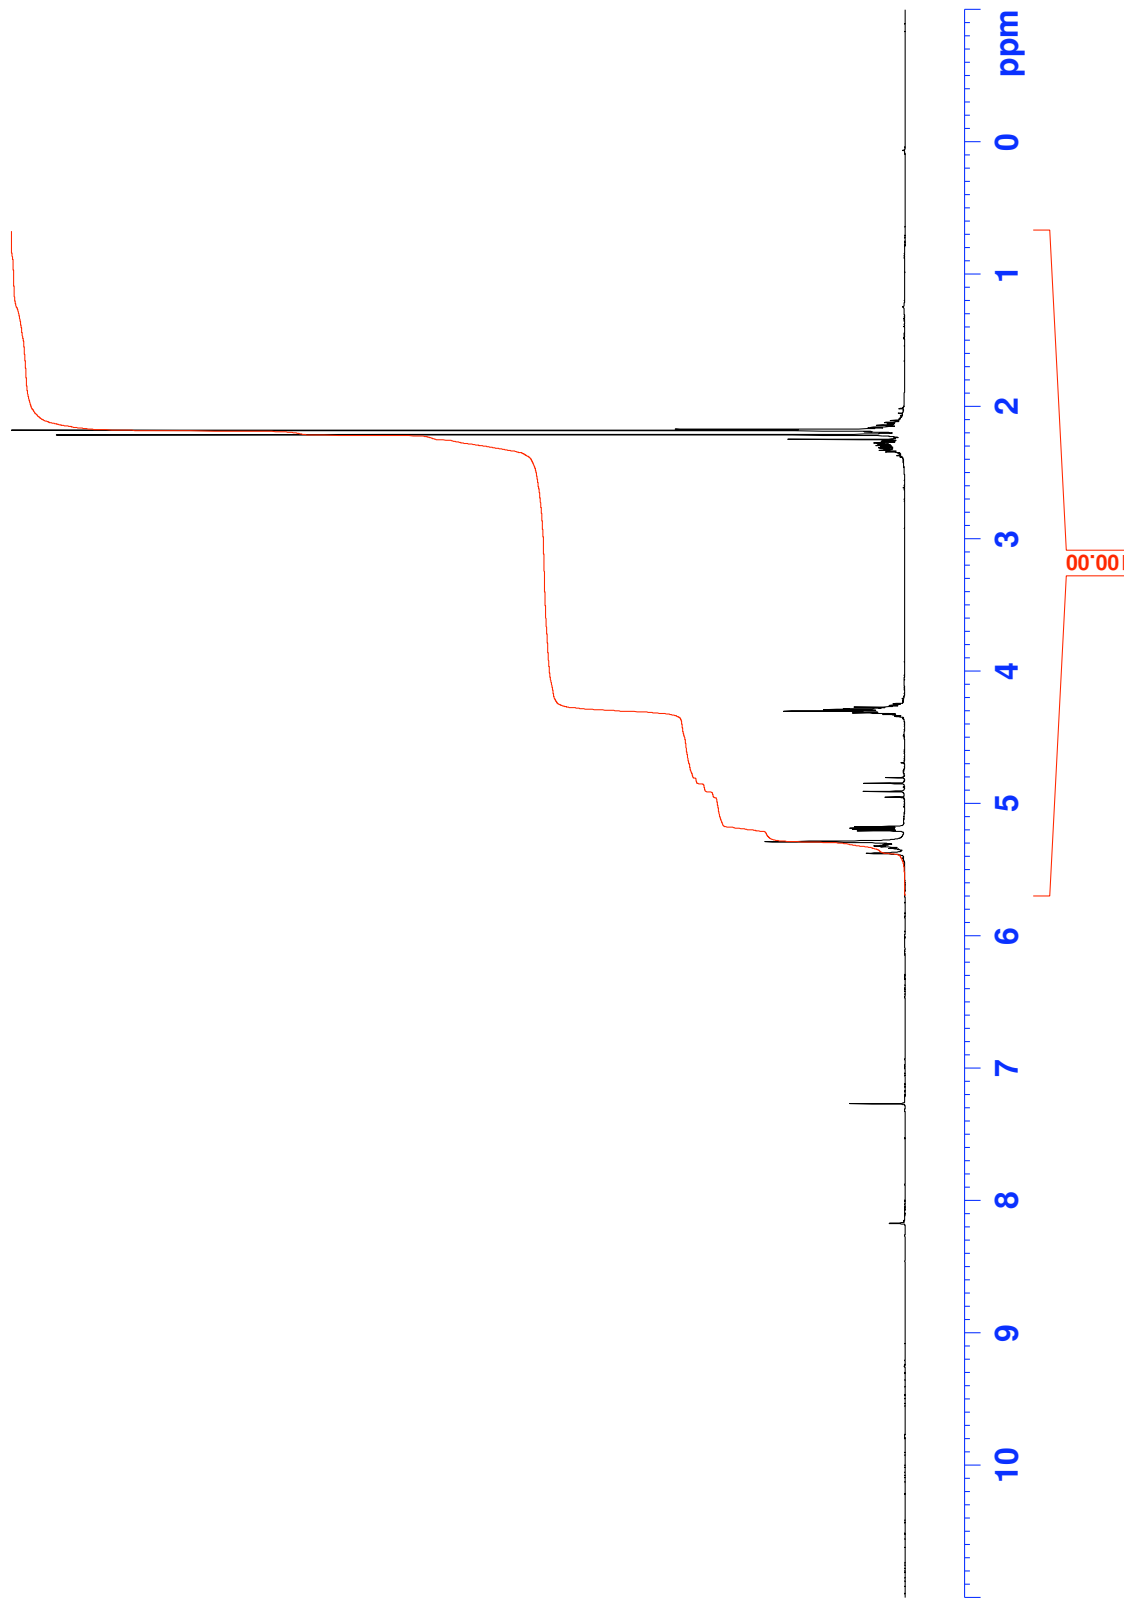

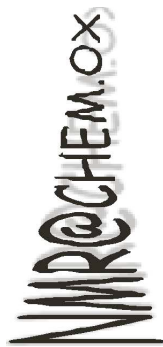

Instrument DQX400  
Chemist GCF  
Group JR  
3-06  
c13acq.au CDCI3 {C:NMR} jrgrp 55

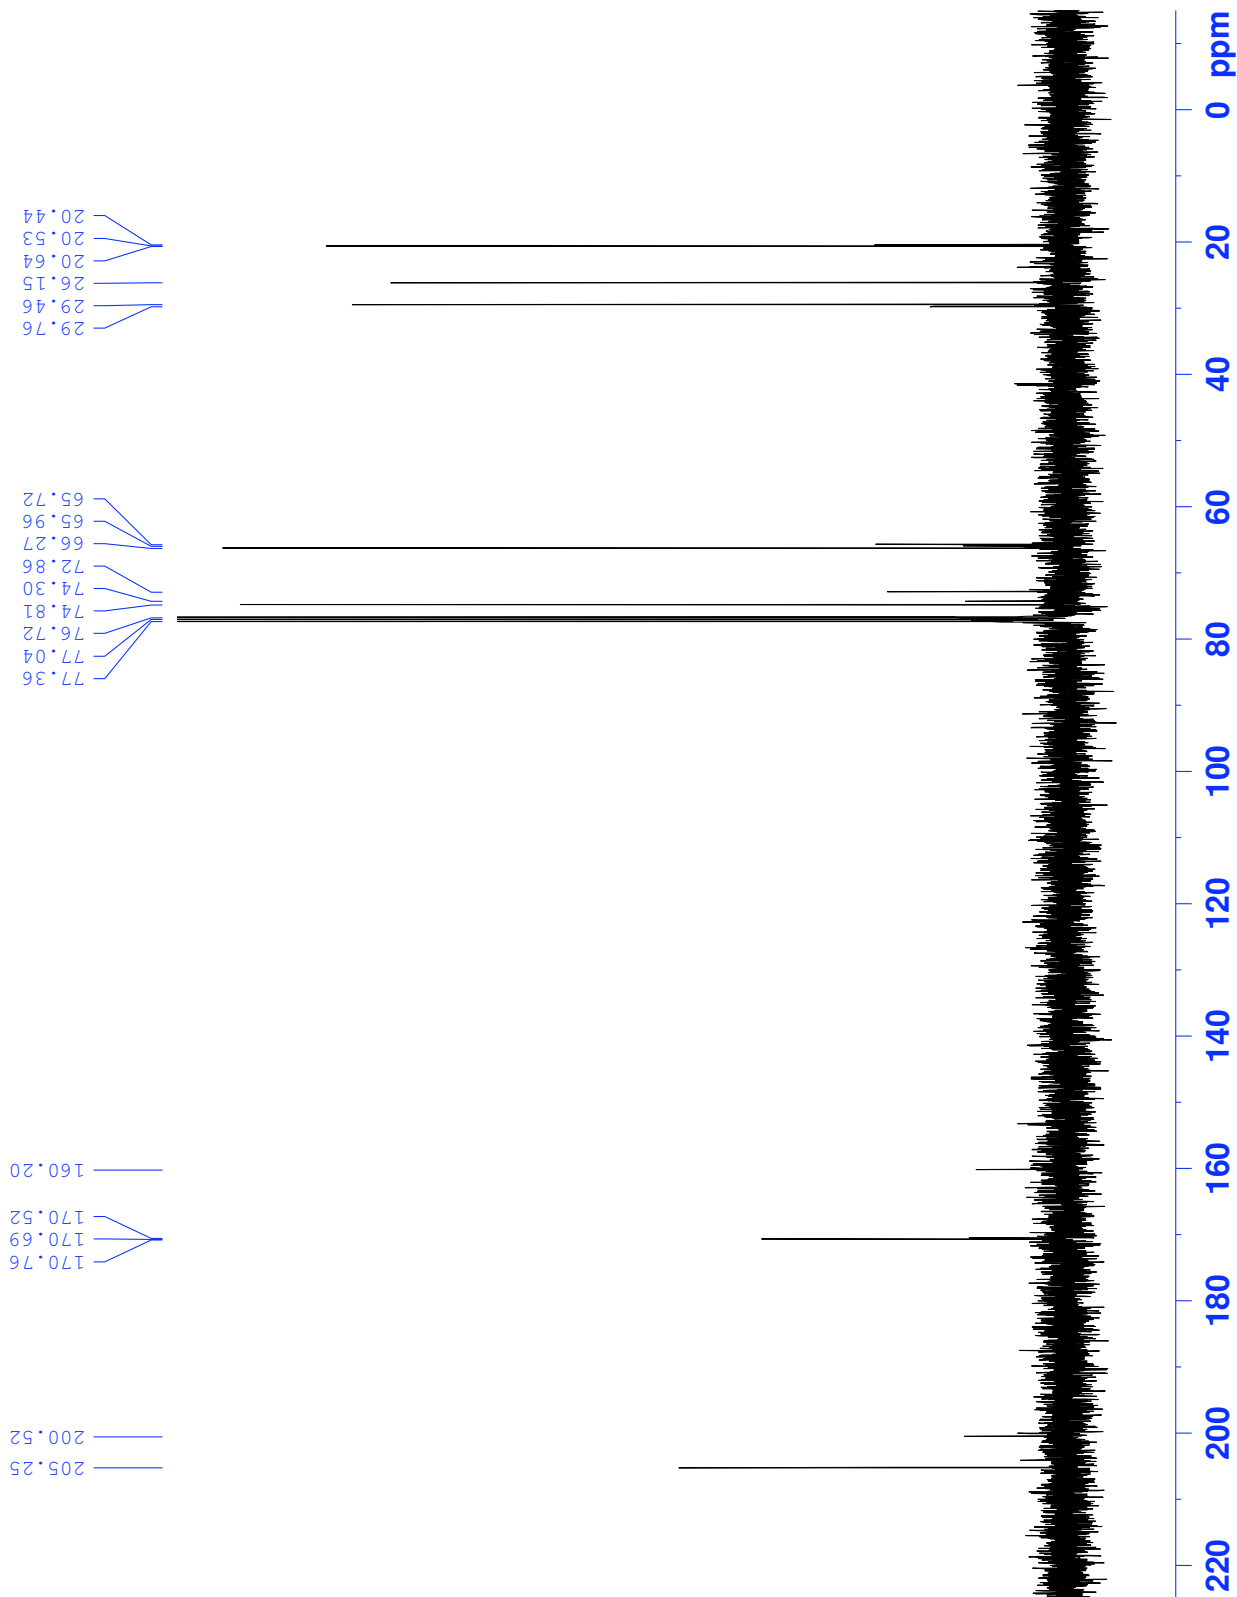

Current Data Parameters  
NAME Aug13-2008-55  
EXPNO 2  
PROCNO 1

F2 - Acquisition Parameters  
Date\_ 20080813  
Time 22.22  
INSTRUM av400  
PROBHD 5 mm QNP 1H/13  
PULPROG zgpg30  
TD 32768  
SOLVENT CDCI3  
NS 256  
DS 4  
SWH 26178.010 Hz  
FIDRES 0.798889 Hz  
AQ 0.6259188 sec  
RG 32768  
DW 19.100 usec  
DE 7.50 usec  
TE 300.0 K  
D1 1.00000000 sec  
d11 0.03000000 sec  
DELTA 0.89999998 sec  
TD0 1

==== CHANNEL f1 =====  
NUC1 13C  
P1 9.50 usec  
PL1 0.00 dB  
SFO1 100.6403931 MHz

==== CHANNEL f2 =====  
CPDPRG2 waltz16  
NUC2 1H  
PCPD2 80.00 usec  
PL12 19.00 dB  
PL13 25.00 dB  
PL2 0.00 dB  
SFO2 400.2016008 MHz

F2 - Processing parameters  
SI 32768  
SF 100.6303718 MHz  
WDW EM  
SSB 0  
LB 1.00 Hz  
GB 0  
PC 1.40



Instrument DQX400  
Chemist GCF  
Group JR  
3-61 F32  
h1acq.au CDCI3 {C:\NMR} jrgpr 33

NMR@CHEM.OX

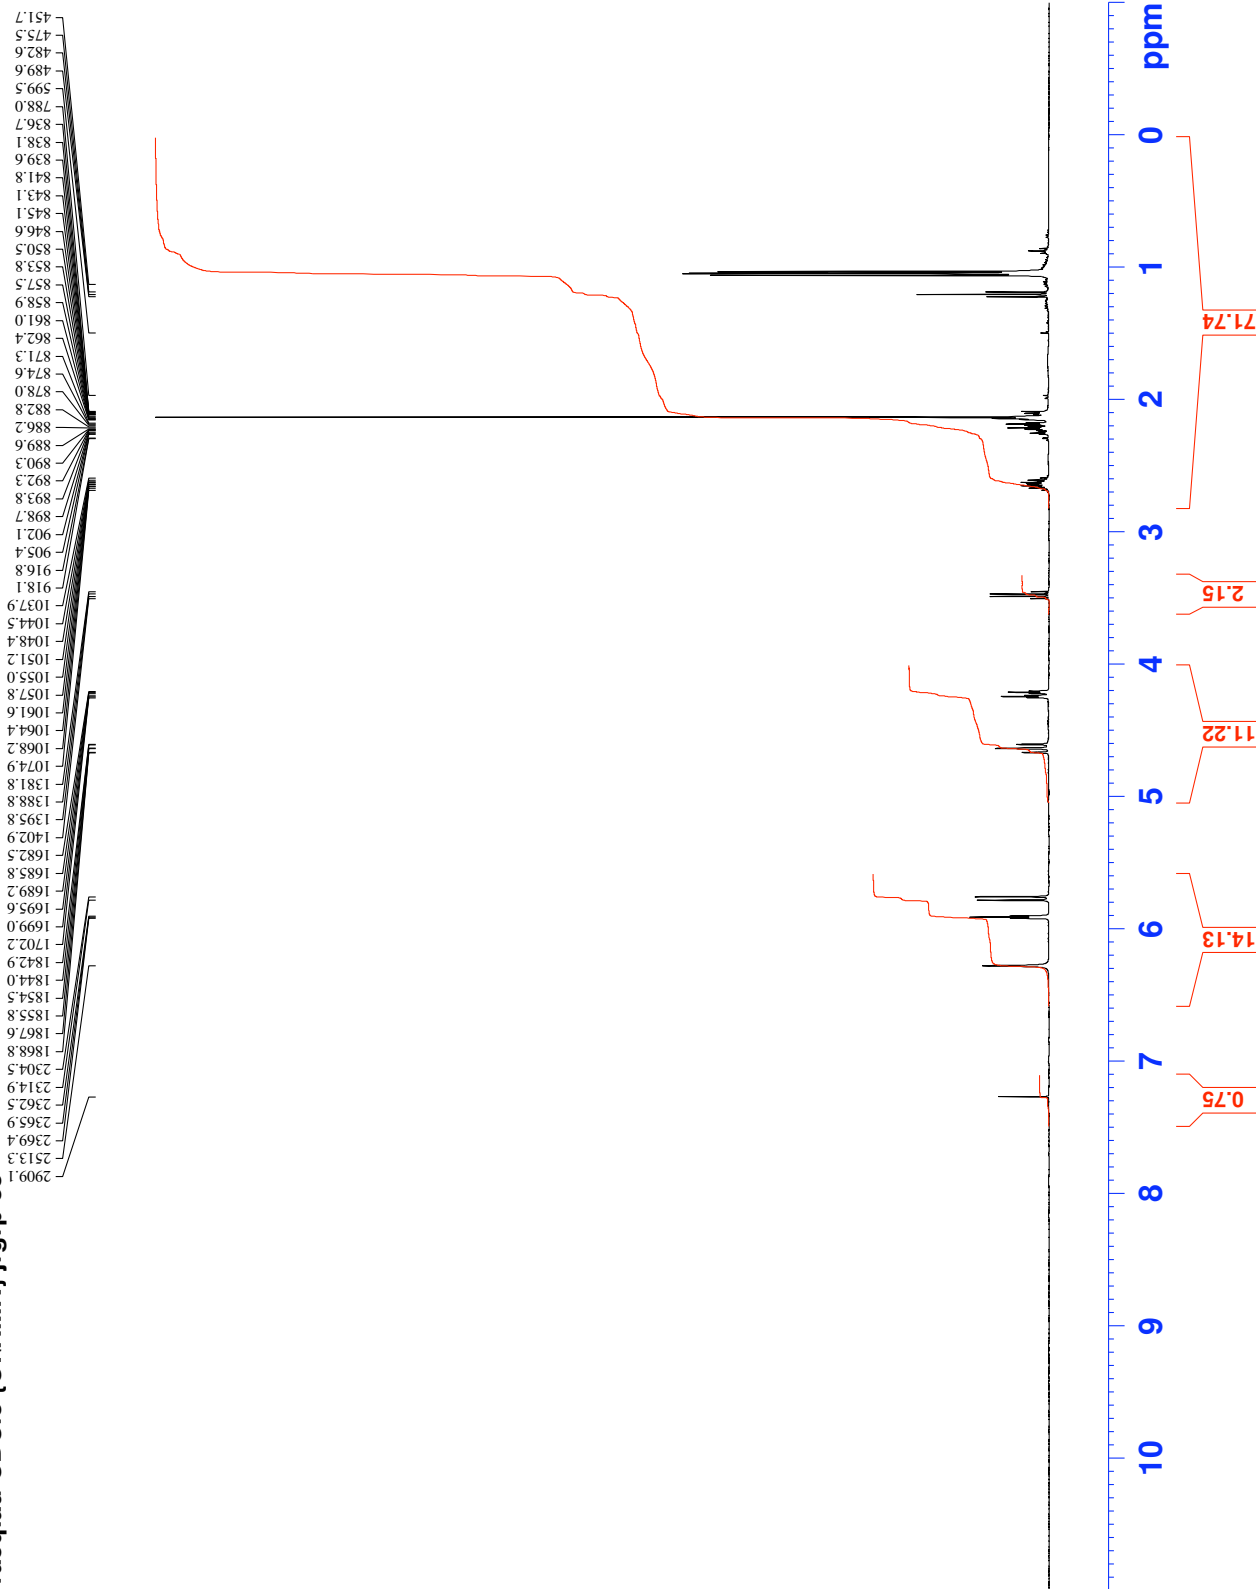

Current Data Parameters  
NAME Dec04-2008-33  
EXPNO 1  
PROCNO 1

F2 - Acquisition Parameters  
Date\_ 20081208  
Time 8.02  
INSTRUM av400  
PROBHD 5 mm QNP 1H/13  
PULPROG zg60  
TD 65536  
SOLVENT CDCI3  
NS 16  
DS 2  
SWH 8278.146 Hz  
FIDRES 0.126314 Hz  
AQ 3.9584243 sec  
RG 90.5  
DW 60.400 usec  
DE 7.50 usec  
TE 300.0 K  
D1 1.0000000 sec

==== CHANNEL f1 =====  
NUC1 1H  
P1 9.00 usec  
PL1 0.00 dB  
SFO1 400.2024714 MHz

F2 - Processing parameters  
SI 32768  
SF 400.2000028 MHz  
WDW EM  
SSB 0  
LB 0.30 Hz  
GB 0  
PC 1.00

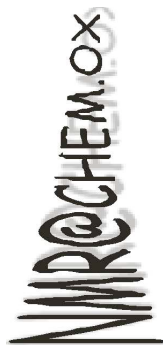

Instrument DQX400  
Chemist GCF  
Group JR  
3-61 F32  
c13acq.au CDCI3 {C:NMR} jrgrp 33

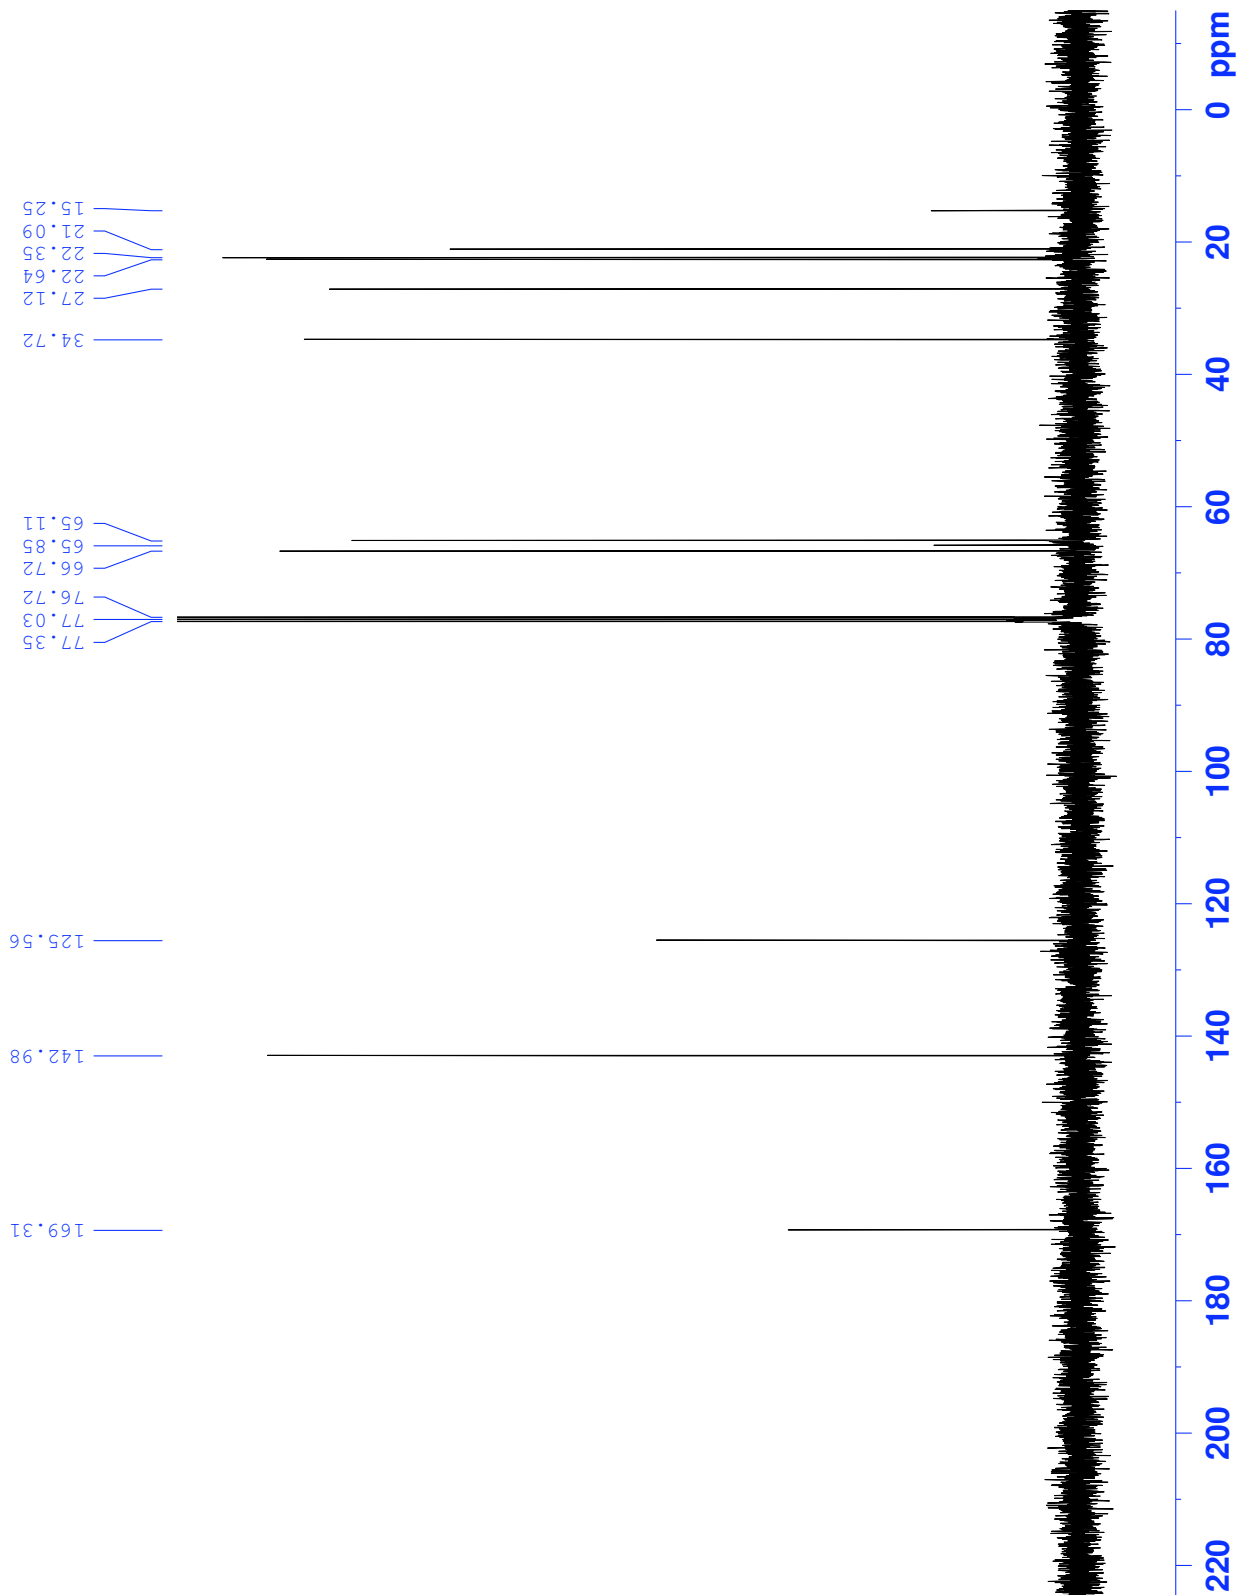

Current Data Parameters  
NAME Dec04-2008-33  
EXPNO 2  
PROCNO 1

F2 - Acquisition Parameters  
Date\_ 20081208  
Time 8.10  
INSTRUM av400  
PROBHD 5 mm QNP 1H/13  
PULPROG zgpg30  
TD 32768  
SOLVENT CDCl3  
NS 256  
DS 4  
SWH 26178.010 Hz  
FIDRES 0.798889 Hz  
AQ 0.6259188 sec  
RG 32768  
DW 19.100 usec  
DE 7.50 usec  
TE 300.0 K  
D1 1.00000000 sec  
d11 0.03000000 sec  
DELTA 0.89999998 sec  
TD0 1

==== CHANNEL f1 =====  
NUC1 13C  
P1 9.50 usec  
PL1 0.00 dB  
SFO1 100.6403931 MHz

==== CHANNEL f2 =====  
CPDPRG2 waltz16  
NUC2 1H  
PCPD2 80.00 usec  
PL12 19.00 dB  
PL13 25.00 dB  
PL2 0.00 dB  
SFO2 400.2016008 MHz

F2 - Processing parameters  
SI 32768  
SF 100.6303718 MHz  
WDW EM  
SSB 0  
LB 1.00 Hz  
GB 0  
PC 1.40

Instrument DQX400  
 Chemist GCF  
 Group JR  
 G12 Product B  
 h1acq.au CDCl3 {C:\NMR} jrgp\_34

NMR@CHEM.OX

```

NAME      Aug24-2009-34
EXPNO     1
PROCNO    1
Date_     20090824
Time      17.38
INSTRUM   av400
PROBHD    5 mm QNP 1H/13
PULPROG   zg60
TD         65536
SOLVENT   CDCl3
NS         16
DS         2
SWH        8278.146 Hz
FIDRES     0.126314 Hz
AQ         3.9584243 sec
RG         362
DW         60.400 usec
DE         7.50 usec
TE         300.0 K
D1         1.0000000 sec

===== CHANNEL f1 =====
NUC1       1H
P1         9.00 usec
PL1        0.00 dB
SF01       400.2024714 MHz
SI         32768
SF         400.2000028 MHz
WDW        EM
SSB        0
LB         0.30 Hz
GB         0
PC         1.00
    
```

1729.4  
1723.4  
1718.4  
1712.3  
1658.7  
1652.7  
1645.5  
1639.4  
1630.7  
1624.7  
1402.7  
1398.4  
1391.0  
1389.8  
1387.0  
1378.7  
1374.4  
965.8  
947.2  
930.1  
901.3  
894.0  
882.5  
863.4  
856.9  
843.8  
839.6  
828.8  
824.5  
816.5  
797.2  
769.6  
673.0  
504.3  
450.7

3003  
2999  
2998  
2994  
2988  
2984  
2983  
2977  
2973  
2971  
2969  
2963  
2957  
2956  
2952  
2949  
2944  
2936  
2908

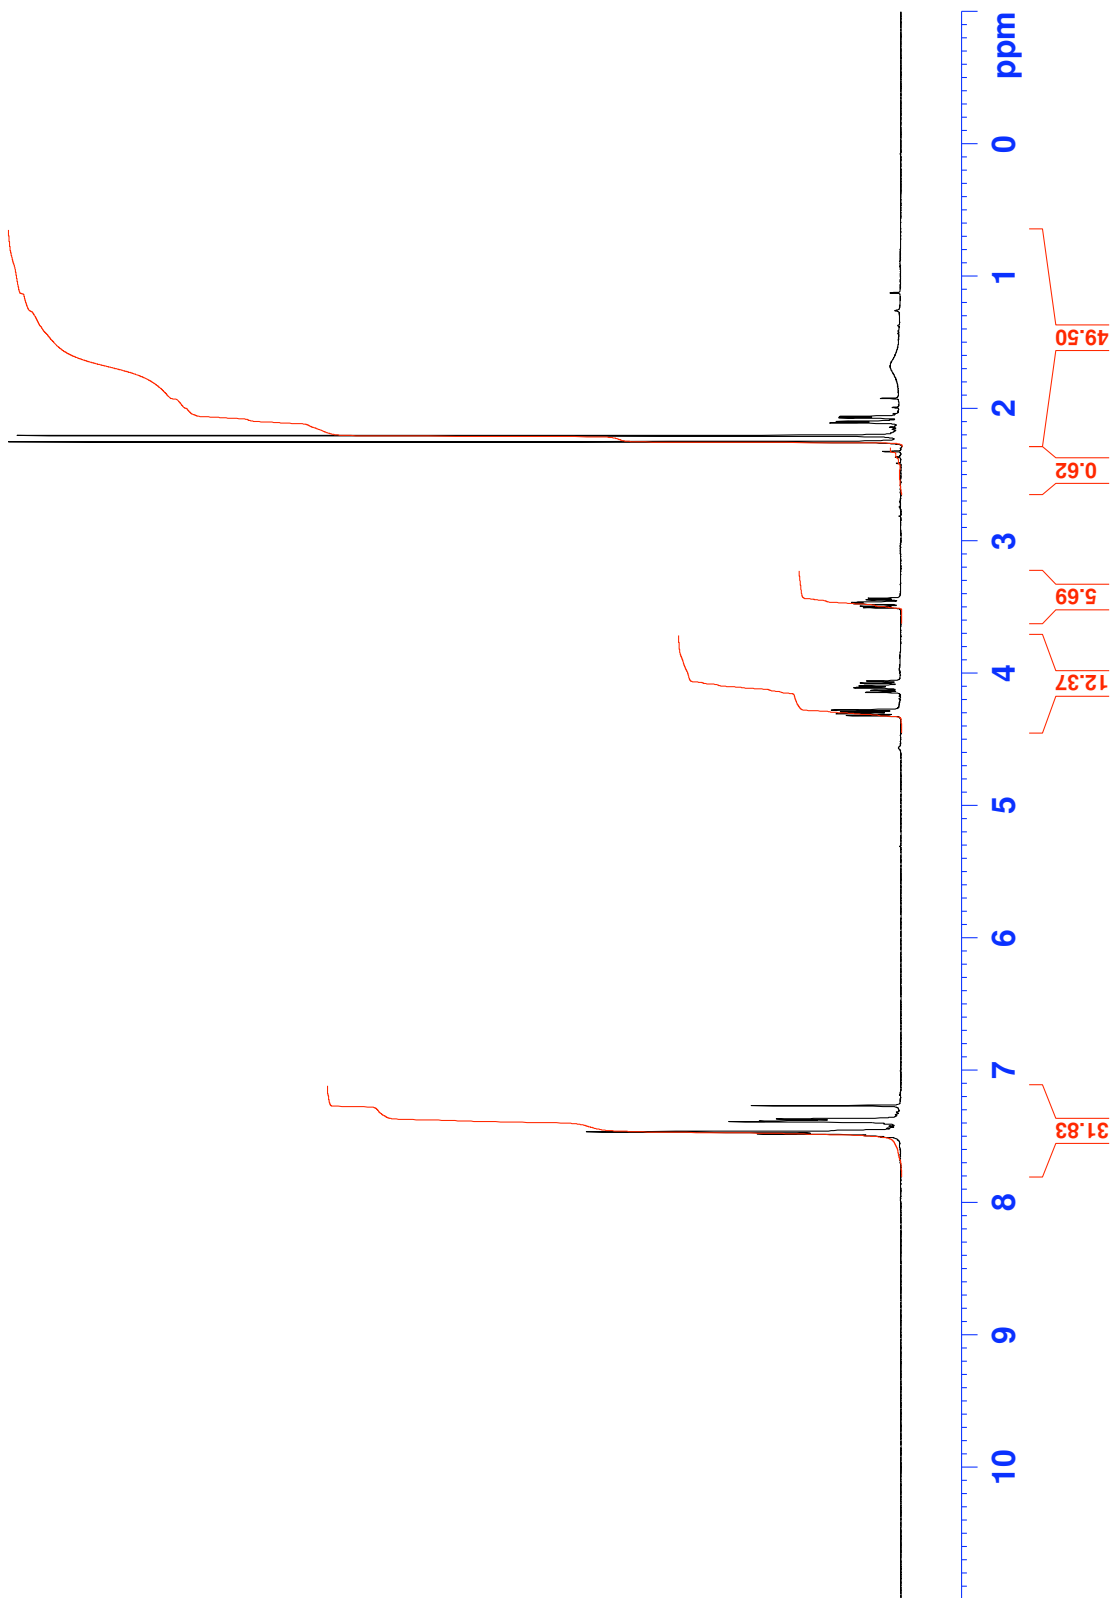

ART3096  
 ART3096  
 N11703-12-2B  
 CXF54252

| Parameter                 | Value               |
|---------------------------|---------------------|
| 1 Origin                  | BrukerBioSpin GmbH  |
| 2 Owner                   | Chemist             |
| 3 Spectrometer            | av500k              |
| 4 Solvent                 | CDCl3               |
| 5 Temperature             | 300.0               |
| 6 Pulse Sequence          | zgpgtheta           |
| 7 Number of Scans         | 1024                |
| 8 Receiver Gain           | 4096                |
| 9 Relaxation Delay        | 1.0000              |
| 10 Pulse Width            | 13.0000             |
| 11 Acquisition Time       | 1.5000              |
| 12 Acquisition Date       | 2009-05-15T06:49:00 |
| 13 Modification Date      | 2009-05-15T06:49:46 |
| 14 Spectrometer Frequency | 125.77              |
| 15 Spectral Width         | 30303.0             |
| 16 Lowest Frequency       | -1318.2             |
| 17 Nucleus                | <sup>13</sup> C     |
| 18 Acquired Size          | 45452               |
| 19 Spectral Size          | 131072              |

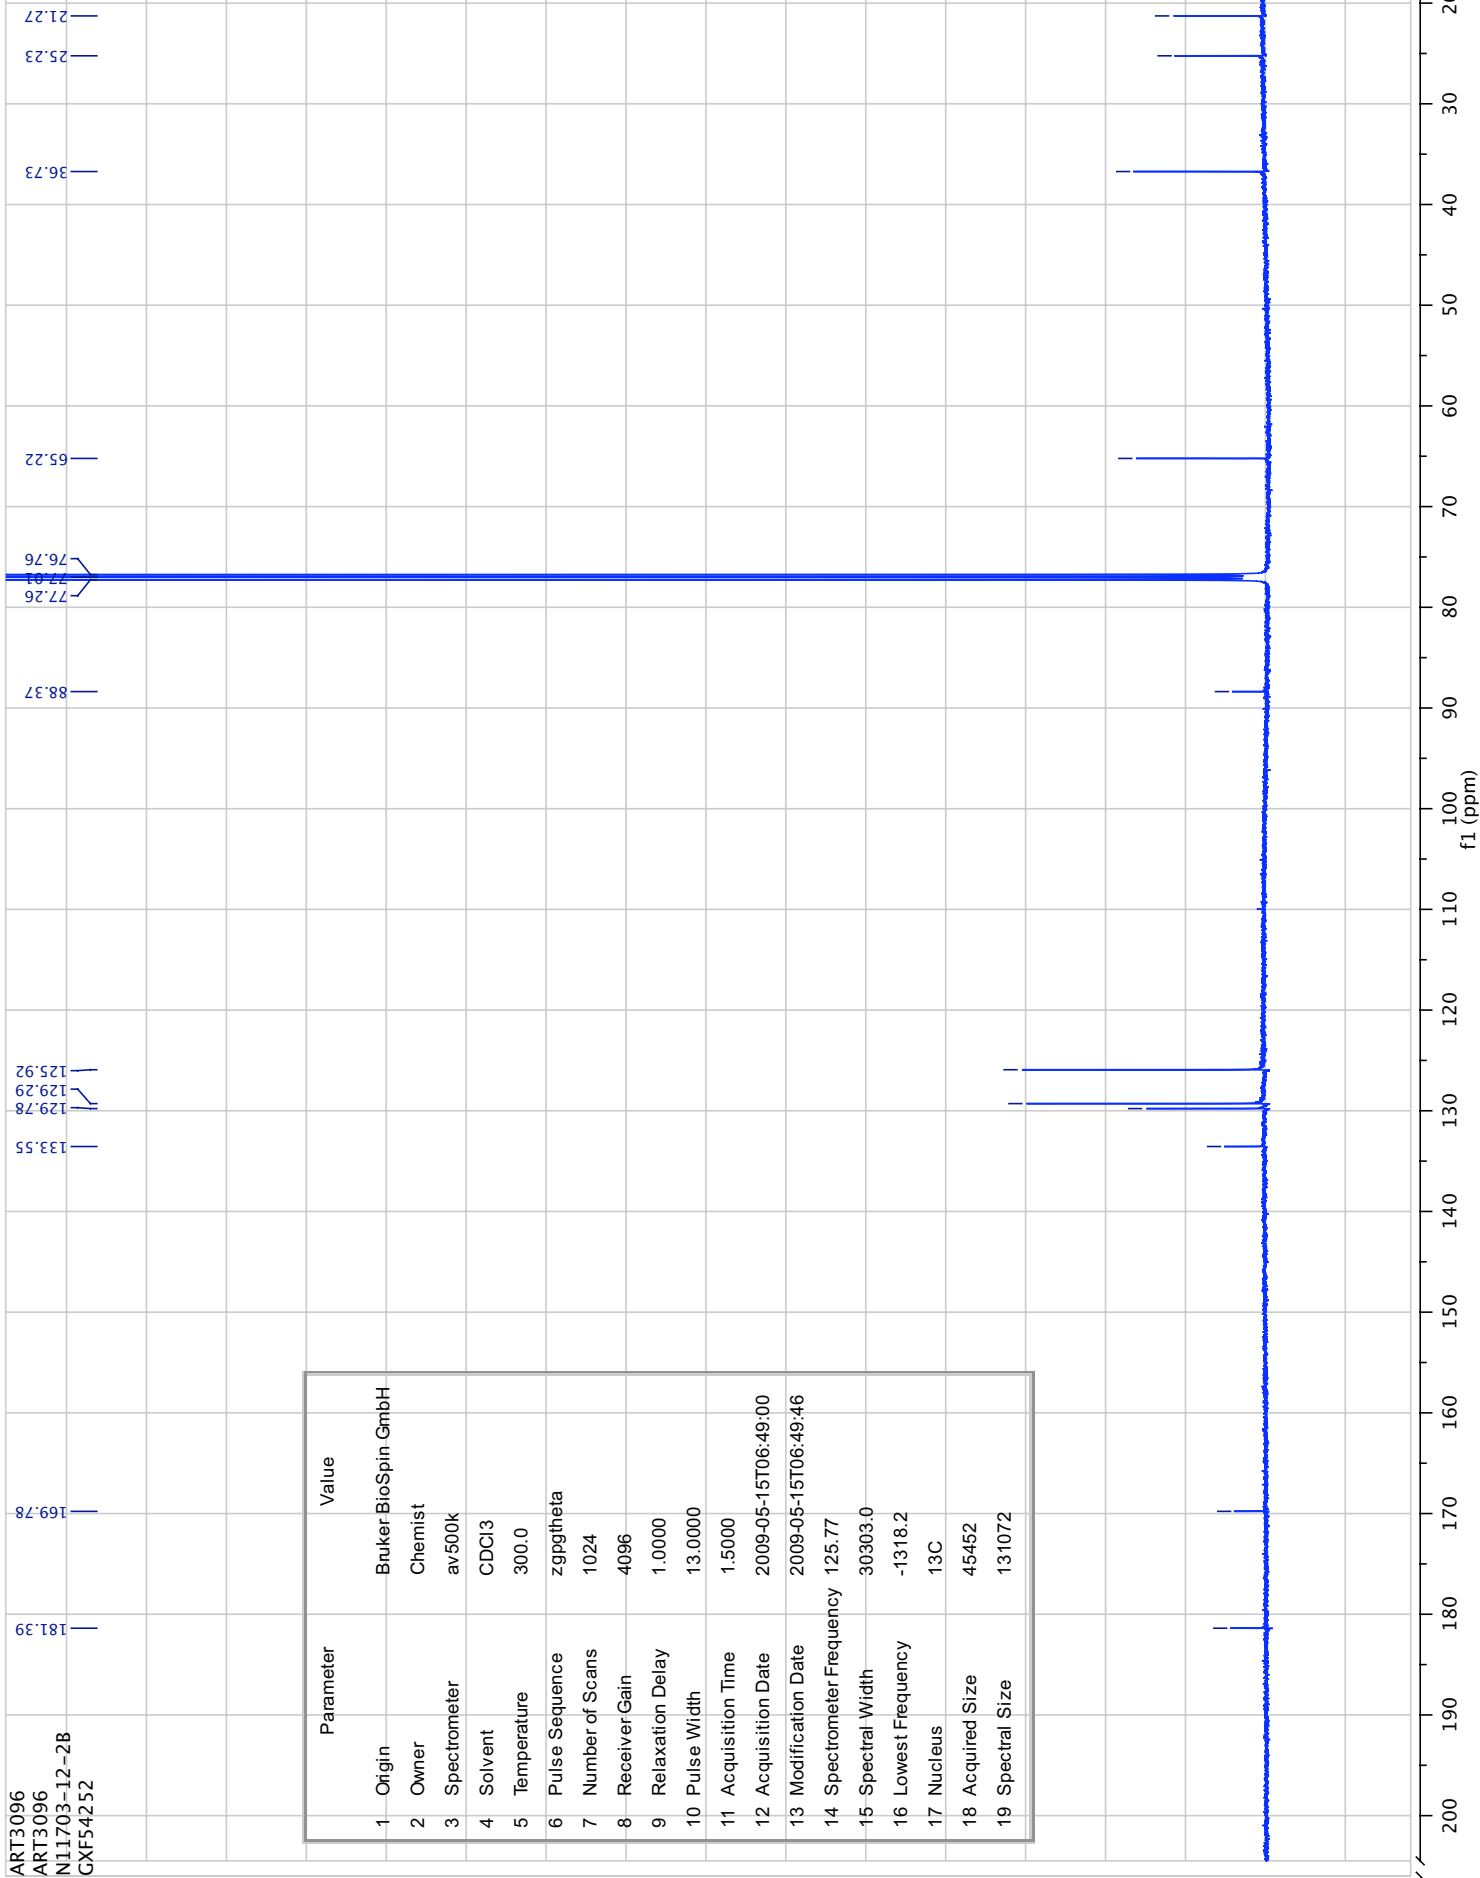

C13-(7)

HNH116048  
HNH116048  
N11703-12-2C  
CXF54252

Position: 35, F12, Feast, George X

Parameter

|    |                        |                  |
|----|------------------------|------------------|
| 1  | Origin                 | UXNMR, BrukerA   |
| 2  | Owner                  | root             |
| 3  | Spectrometer           | dpx400h          |
| 4  | Solvent                | CDCl3            |
| 5  | Temperature            | 300.0            |
| 6  | Pulse Sequence         | zgtheta          |
| 7  | Number of Scans        | 32               |
| 8  | Receiver Gain          | 256              |
| 9  | Relaxation Delay       | 1.0000           |
| 10 | Pulse Width            | 14.0000          |
| 11 | Acquisition Time       | 4.0000           |
| 12 | Acquisition Date       | 2009-05-14 11:09 |
| 13 | Modification Date      | 2009-05-14 11:09 |
| 14 | Spectrometer Frequency | 400.18           |
| 15 | Spectral Width         | 7183.9           |
| 16 | Lowest Frequency       | -590.6           |
| 17 | Nucleus                | 1H               |
| 18 | Acquired Size          | 28735            |
| 19 | Spectral Size          | 65636            |

Supplementary Material (ESI) for Chemical Communications  
This journal is (c) The Royal Society of Chemistry 2010

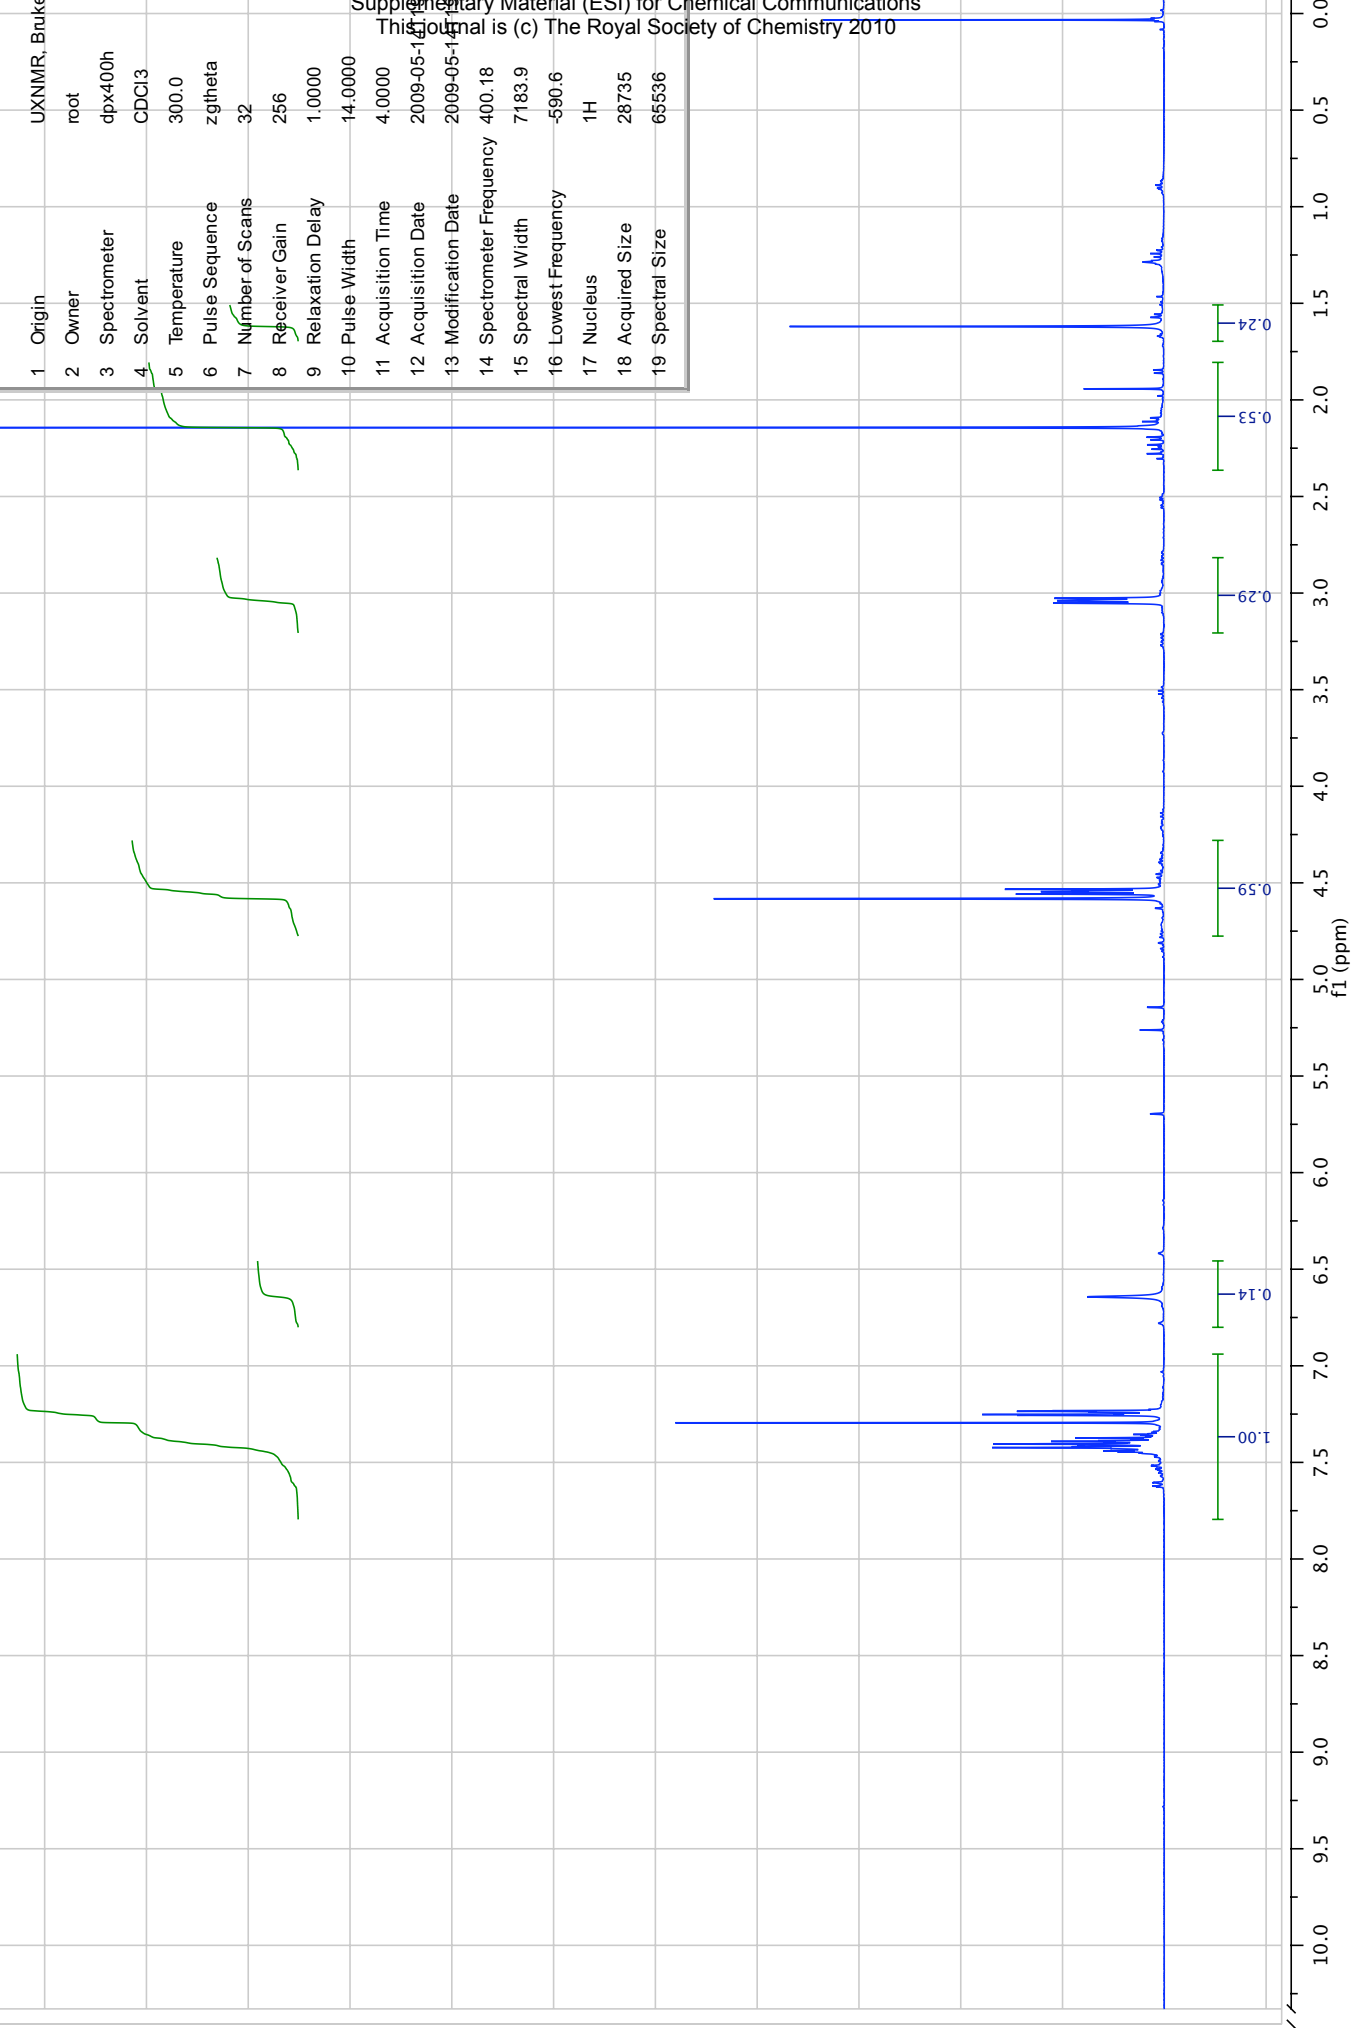

H1-(8)

HNH116048  
HNH116048  
N11703-12-2C  
CXF54252  
Position: 35, F12, Feast, George X

| Parameter                 | Value                                    |
|---------------------------|------------------------------------------|
| 1 Origin                  | UXNMR, Bruker Analytische Messtechnik Gm |
| 2 Owner                   | root                                     |
| 3 Spectrometer            | dpx400h                                  |
| 4 Solvent                 | CDCl3                                    |
| 5 Temperature             | 300.0                                    |
| 6 Pulse Sequence          | zgpgtheta                                |
| 7 Number of Scans         | 3200                                     |
| 8 Receiver Gain           | 1290                                     |
| 9 Relaxation Delay        | 1.0000                                   |
| 10 Pulse Width            | 10.0000                                  |
| 11 Acquisition Time       | 1.5000                                   |
| 12 Acquisition Date       | 2009-05-14T21:26:00                      |
| 13 Modification Date      | 2009-05-14T21:27:04                      |
| 14 Spectrometer Frequency | 100.64                                   |
| 15 Spectral Width         | 24154.6                                  |
| 16 Lowest Frequency       | -1008.5                                  |
| 17 Nucleus                | <sup>13</sup> C                          |
| 18 Acquired Size          | 36230                                    |
| 19 Spectral Size          | 131072                                   |

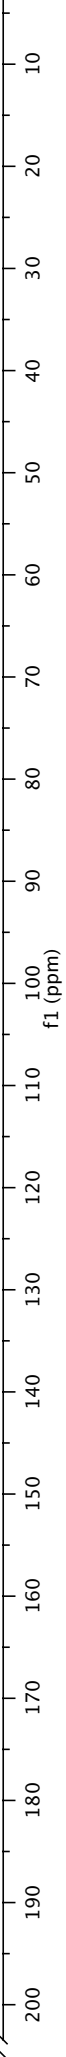

C13-(8)

NMR@CHEM.OX

Sep30-2009-4

NAME  
EXPNO 1  
PROCNO 1  
Date\_ 20090930  
Time 22.30  
INSTRUM av400  
PROBHD 5 mm QNP 1H/13  
PULPROG zg60  
TD 65536  
SOLVENT CDC13  
NS 16  
DS 2  
SWH 8278.146 Hz  
FIDRES 0.126314 Hz  
AQ 3.9584243 sec  
RG 90.5  
DW 60.400 usec  
DE 7.50 usec  
TE 300.0 K  
D1 1.0000000 sec

=====  
CHANNEL f1 =====  
NUC1 1H  
P1 9.00 usec  
PL1 0.00 dB  
SFO1 400.2024714 MHz  
SI 32768  
SF 400.2000028 MHz  
WDW EM  
SSB 0  
LB 0.30 Hz  
GB 0  
PC 1.00

1881.5  
1869.9  
1857.9  
1849.5  
1837.6  
1711.4  
1709.9  
1707.0  
1699.3  
1697.6  
1694.7  
1543.5  
1402.7  
1395.6  
1388.6  
1381.6  
928.6  
923.9  
912.5  
907.8  
897.3  
892.6  
840.4  
784.9  
773.7  
769.0  
757.7  
748.1  
703.1  
599.7  
557.2  
550.7  
545.0  
536.5  
519.4  
499.8  
492.7  
489.0  
482.0  
475.0  
472.0  
424.5  
415.3  
408.7  
401.0  
395.1

Instrument DQX400  
Chemist GCF  
Group JR  
4-68  
h1acq.au CDC13 {C:\NMR} jrgrp 4

2908.7  
2704.7

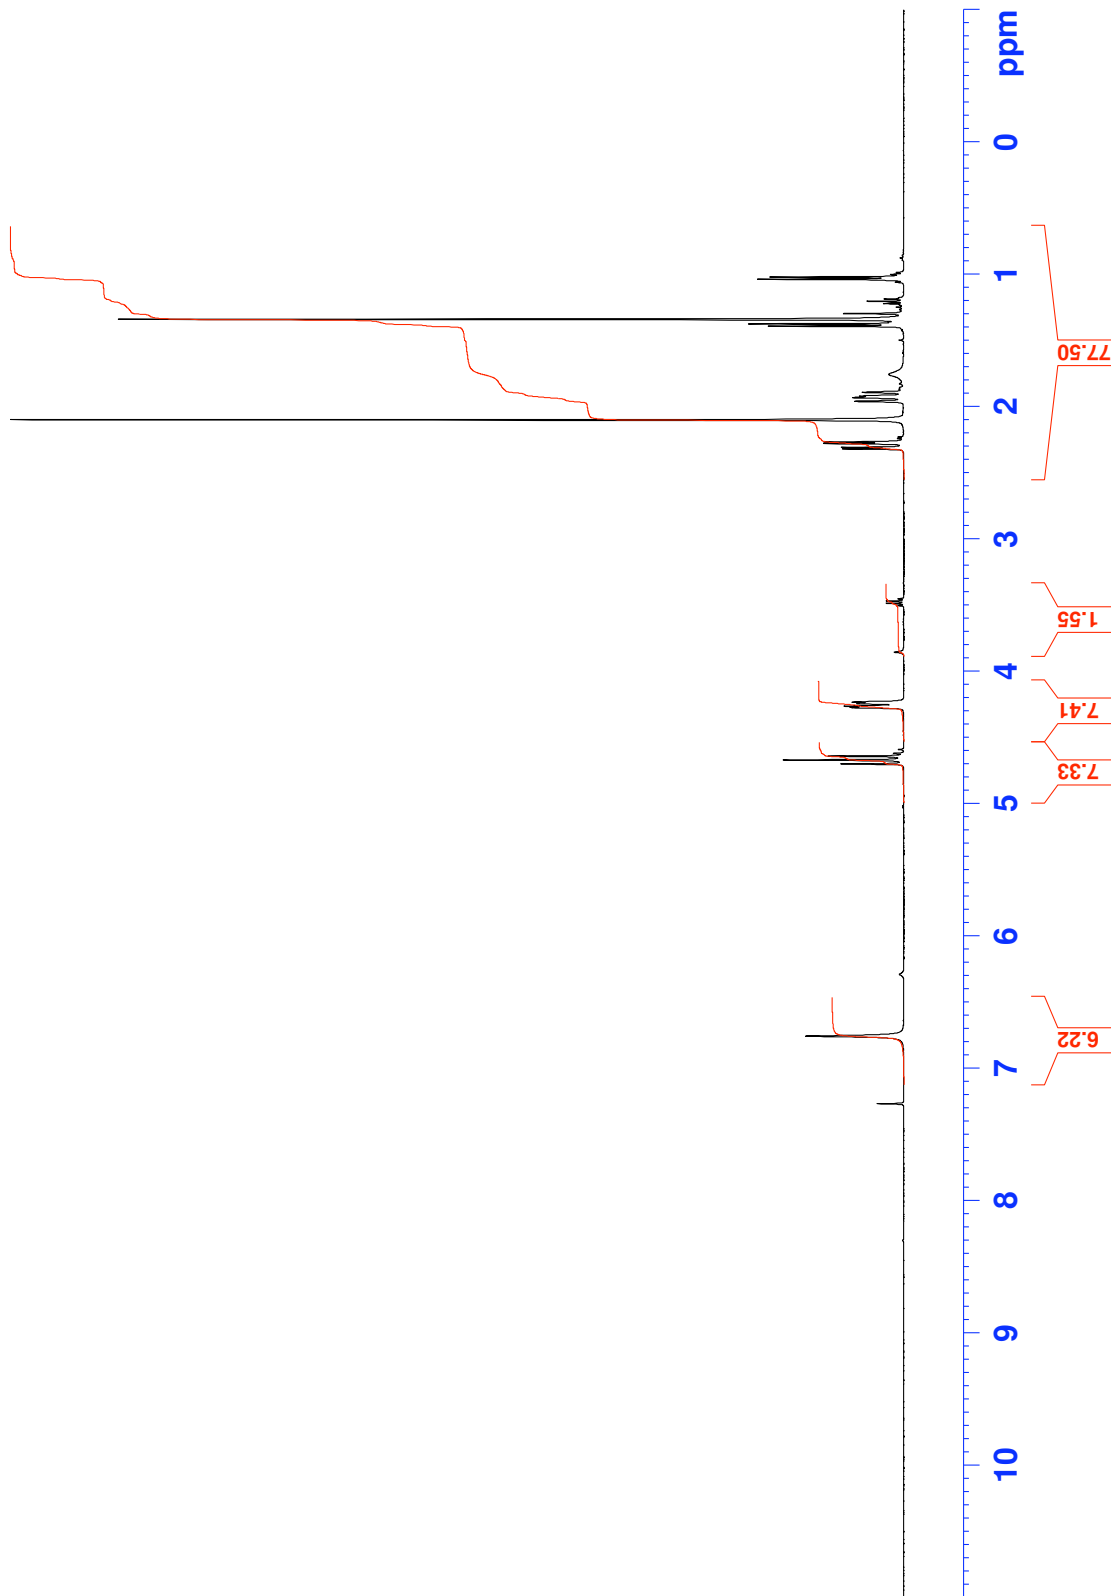

Instrument DQX400  
 Chemist GCF  
 Group JR  
 4-68  
 c13acq.au CDCI3 {C:NMR} jrgrp 4

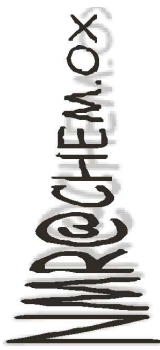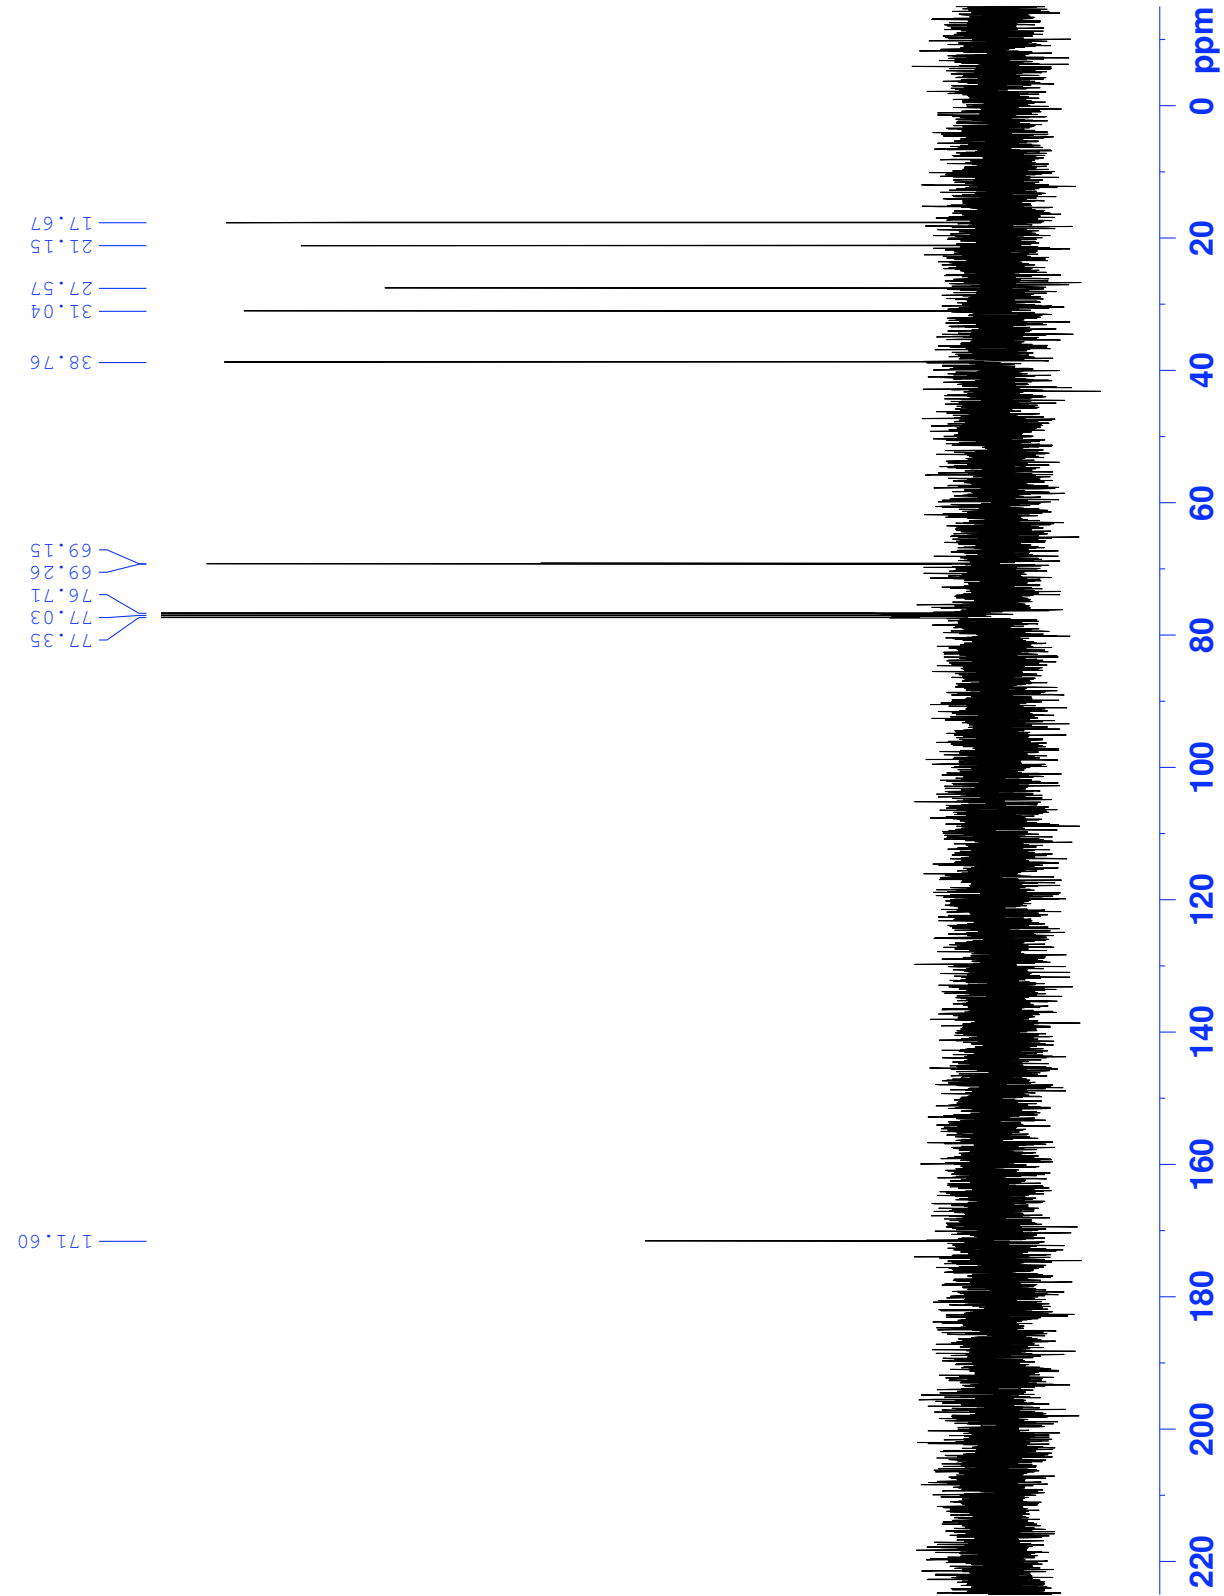

Sep30-2009-4  
 NAME  
 EXPNO 2  
 PROCNO 1  
 Date\_ 20090930  
 Time 22.39  
 INSTRUM av400  
 PROBHD 5 mm QNP 1H/13  
 PULPROG zgpg30  
 TD 32768  
 SOLVENT CDCI3  
 NS 256  
 DS 4  
 SWH 26178.010 Hz  
 FIDRES 0.798889 Hz  
 AQ 0.6259188 sec  
 RG 32768  
 DW 19.100 usec  
 DE 7.50 usec  
 TE 300.0 K  
 D1 1.00000000 sec  
 D11 0.03000000 sec  
 TD0 1

==== CHANNEL f1 =====  
 NUC1 13C  
 P1 9.50 usec  
 PL1 0.00 dB  
 SFO1 100.6403931 MHz  
 ===== CHANNEL f2 =====  
 CPDPRG2 waltz16  
 NUC2 1H  
 PCPD2 80.00 usec  
 PL2 0.00 dB  
 PL12 19.00 dB  
 PL13 25.00 dB  
 SFO2 400.2016008 MHz  
 SI 32768  
 SF 100.6303718 MHz  
 WDW EM  
 SSB 0  
 LB 1.00 Hz  
 GB 0  
 PC 1.40



Instrument DQX400  
Chemist GCF  
Group JR  
3-96  
h1acq.au CDC13 (C:\NMR)\jgrp 47

NMR@CHEM.OX

NAME Feb11-2009-47  
EXPNO 1  
PROCNO 1  
Date\_ 20090211  
Time 16.39  
INSTRUM av400  
PROBHD 5 mm QNP 1H/13  
PULPROG zg60  
TD 65536  
SOLVENT CDC13  
NS 16  
DS 2  
SWH 8278.146 Hz  
FIDRES 0.126314 Hz  
AQ 3.9584243 sec  
RG 90.5  
DW 60.400 usec  
DE 7.50 usec  
TE 294.7 K  
D1 1.0000000 sec

==== CHANNEL f1 =====  
NUC1 1H  
P1 9.00 usec  
PL1 0.00 dB  
SFO1 400.2024714 MHz  
SI 32768  
SF 400.2000028 MHz  
WDW EM  
SSB 0  
LB 0.30 Hz  
GB 0  
PC 1.00

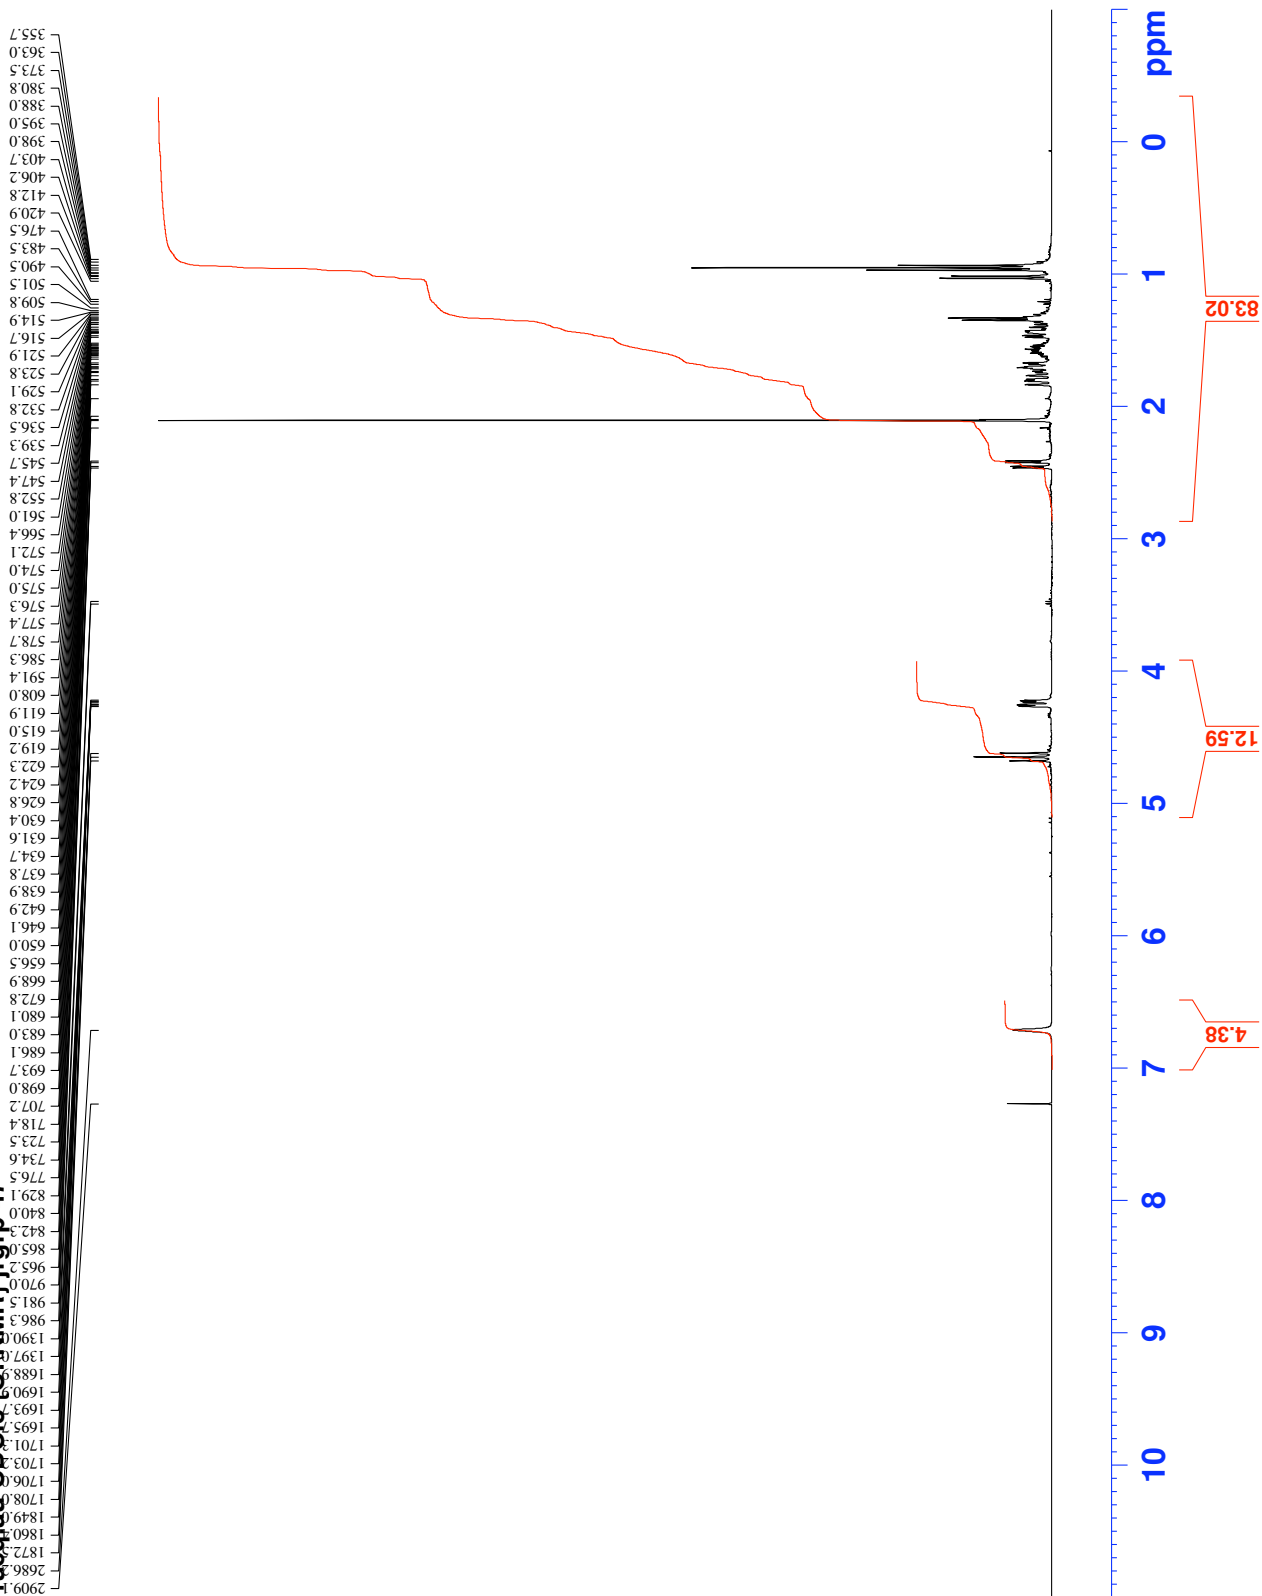

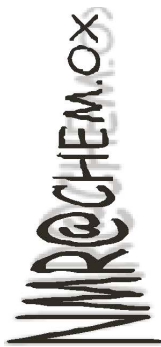

Feb11-2009-47  
NAME  
EXPNO 2  
PROCNO 1  
Date\_ 20090211  
Time 16.47  
INSTRUM av400  
PROBHD 5 mm QNP 1H/13  
PULPROG zgpg30  
TD 32768  
SOLVENT CDC13  
NS 256  
DS 4  
SWH 26178.010 Hz  
FIDRES 0.798889 Hz  
AQ 0.6259188 sec  
RG 32768  
DW 19.100 usec  
DE 7.50 usec  
TE 295.1 K  
D1 1.00000000 sec  
D11 0.03000000 sec  
TDO 1  
==== CHANNEL f1 =====  
NUC1 13C  
P1 9.50 usec  
PL1 0.00 dB  
SFO1 100.6403931 MHz  
==== CHANNEL f2 =====  
CPDPRG2 waltz16  
NUC2 1H  
PCPD2 80.00 usec  
PL2 0.00 dB  
PL12 19.00 dB  
PL13 25.00 dB  
SFO2 400.2016008 MHz  
SI 32768  
SF 100.6303718 MHz  
WDW EM  
SSB 0  
LB 1.00 Hz  
GB 0  
PC 1.40

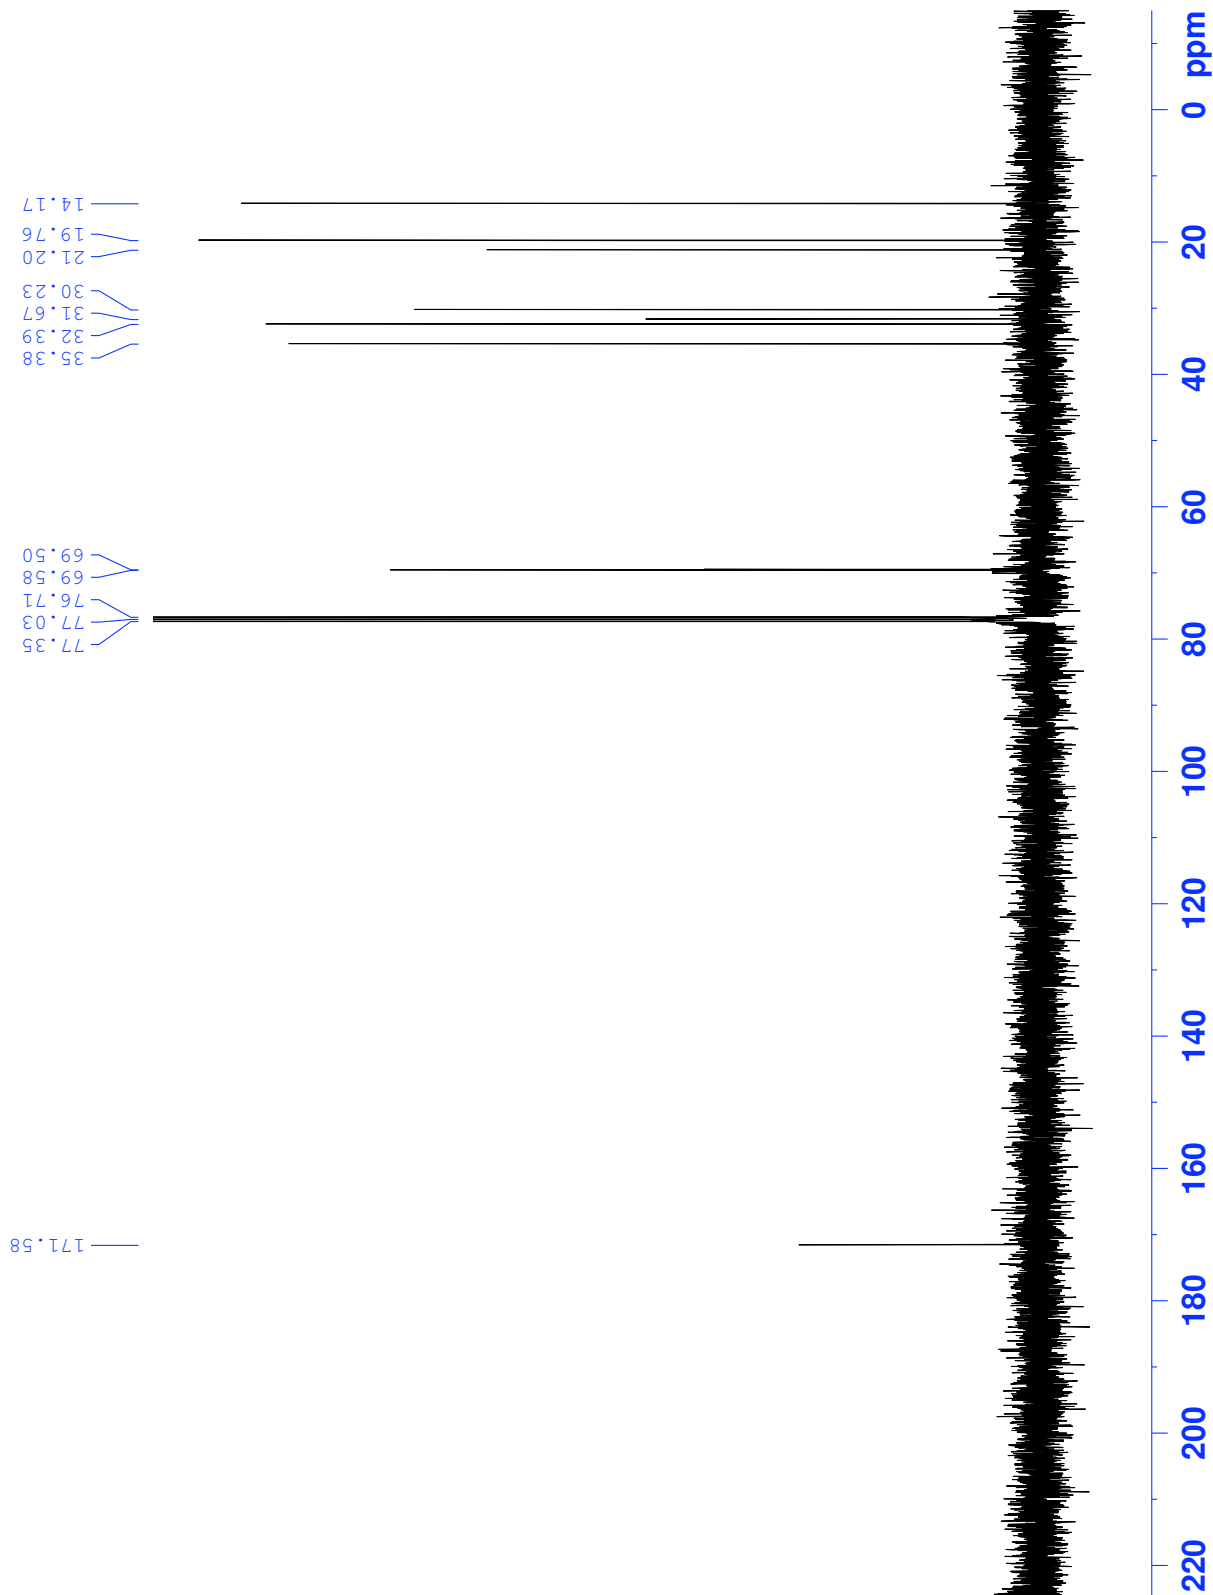

Instrument DQX400  
Chemist GCF  
Group JR  
3-96  
c13acq.au CDC13 {C:NMR} jrgrp 47

HNC147614  
 HNC147614  
 N11703-38-C2  
 gxf54252  
 Position: 31, ProductI, Feast, George X

| Parameter                 | Value                                      |
|---------------------------|--------------------------------------------|
| 1 Origin                  | UXNMR, Bruker Analytische Messtechnik GmbH |
| 2 Owner                   | root                                       |
| 3 Spectrometer            | dpx400c                                    |
| 4 Solvent                 | CDCl3                                      |
| 5 Temperature             | 296.2                                      |
| 6 Pulse Sequence          | zgtheta                                    |
| 7 Number of Scans         | 32                                         |
| 8 Receiver Gain           | 256                                        |
| 9 Relaxation Delay        | 1.0000                                     |
| 10 Pulse Width            | 11.4000                                    |
| 11 Acquisition Time       | 4.0000                                     |
| 12 Acquisition Date       | 2009-06-17T19:07:00                        |
| 13 Modification Date      | 2009-06-17T19:08:00                        |
| 14 Spectrometer Frequency | 400.13                                     |
| 15 Spectral Width         | 7183.9                                     |
| 16 Lowest Frequency       | -591.0                                     |
| 17 Nucleus                | <sup>1</sup> H                             |
| 18 Acquired Size          | 28735                                      |
| 19 Spectral Size          | 65536                                      |

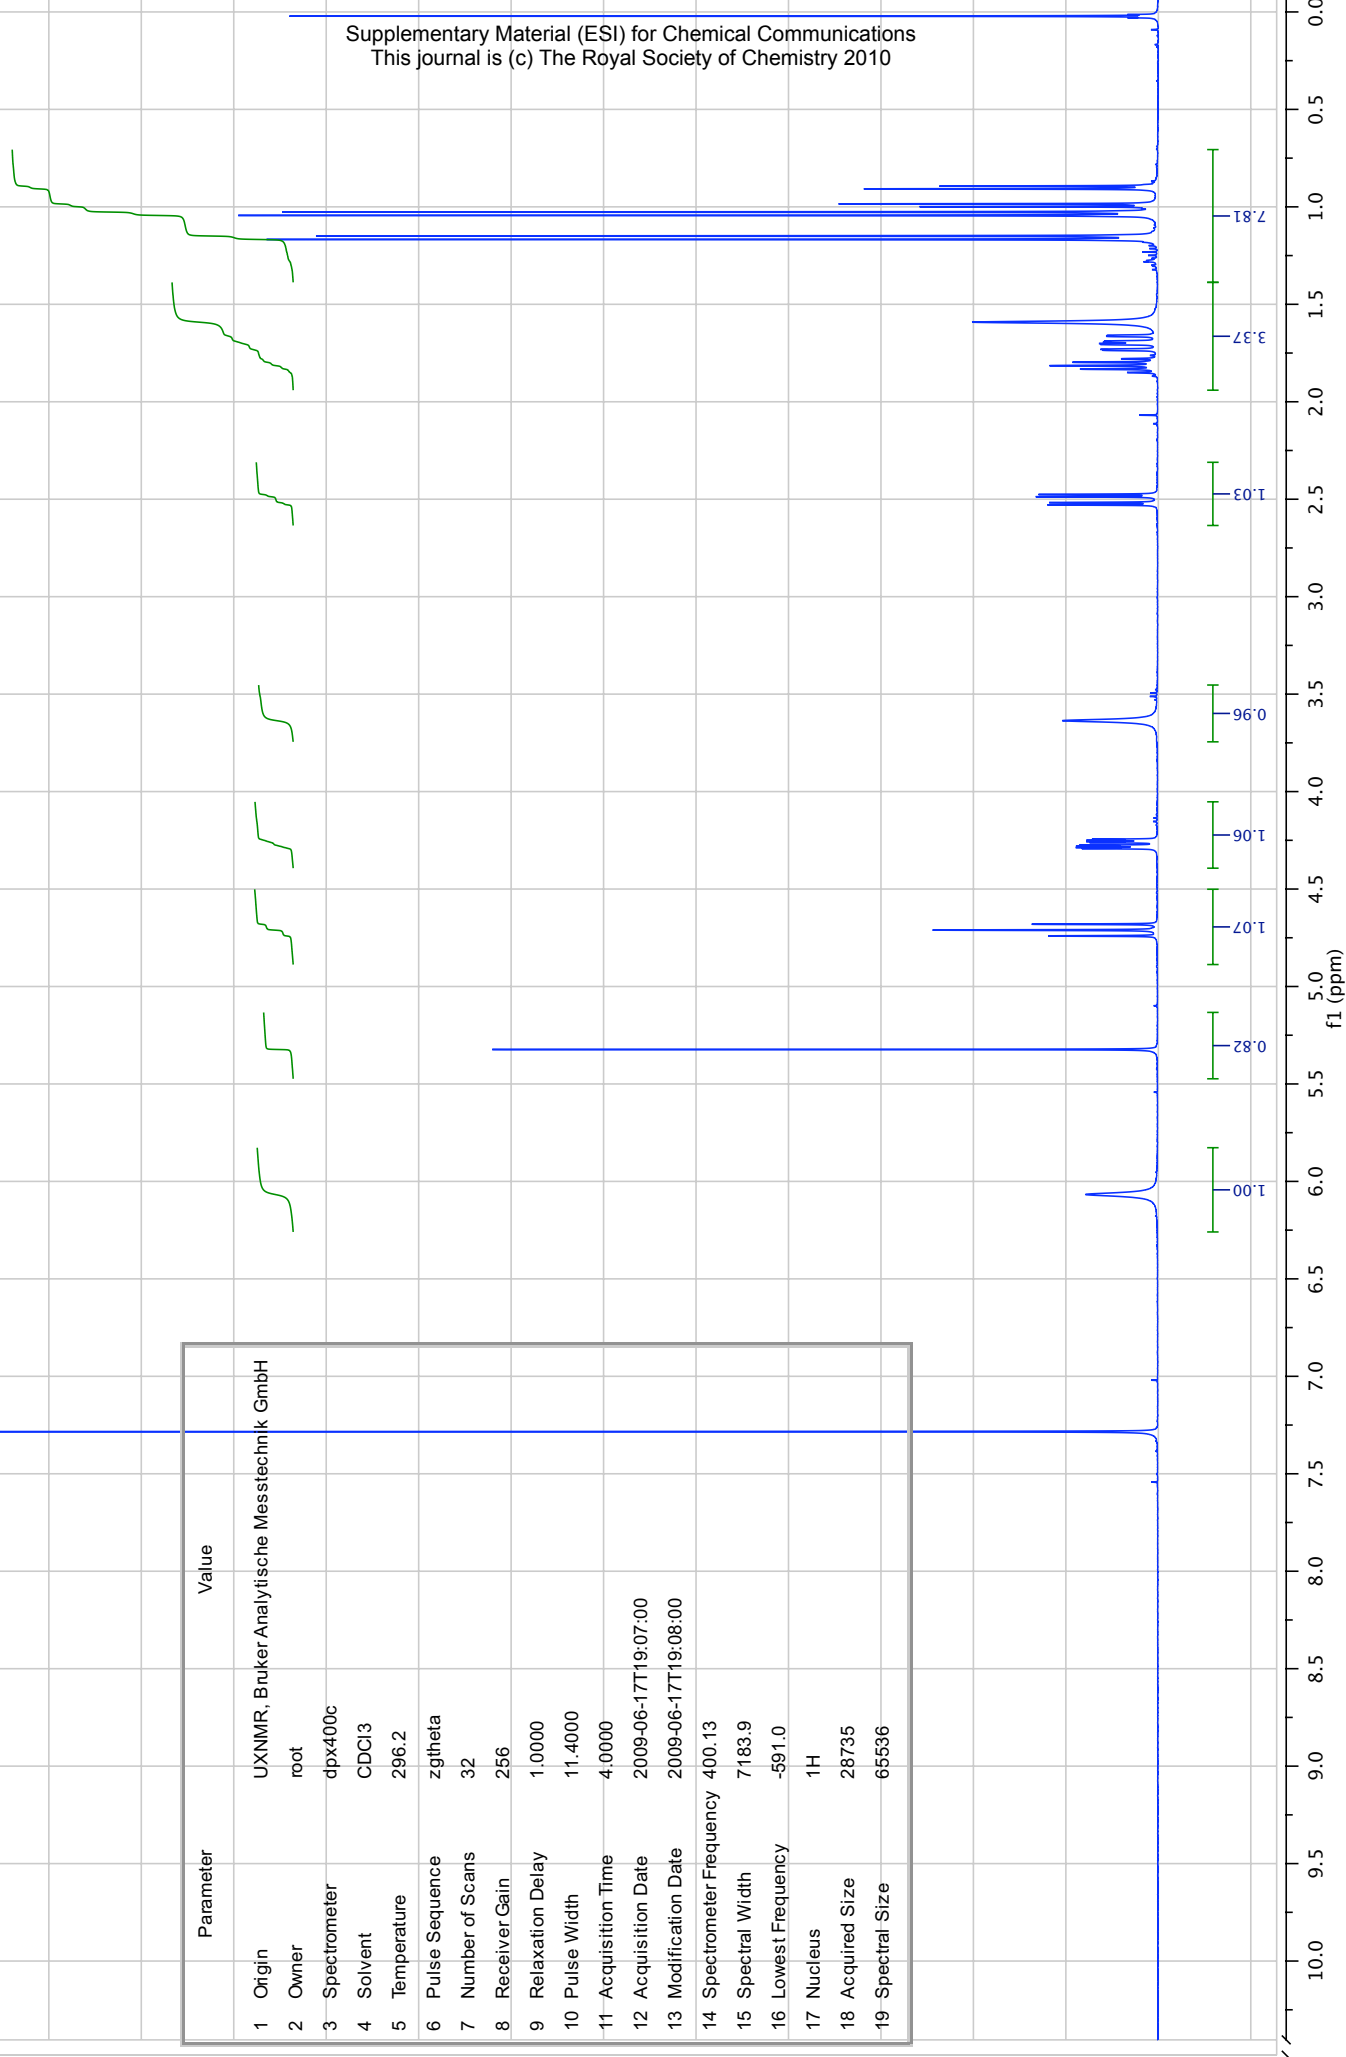

H1-(14)

HNC147614  
HNC147614  
N11703-38-C2  
gxf54252

Position: 31, ProductI, Feast, George X

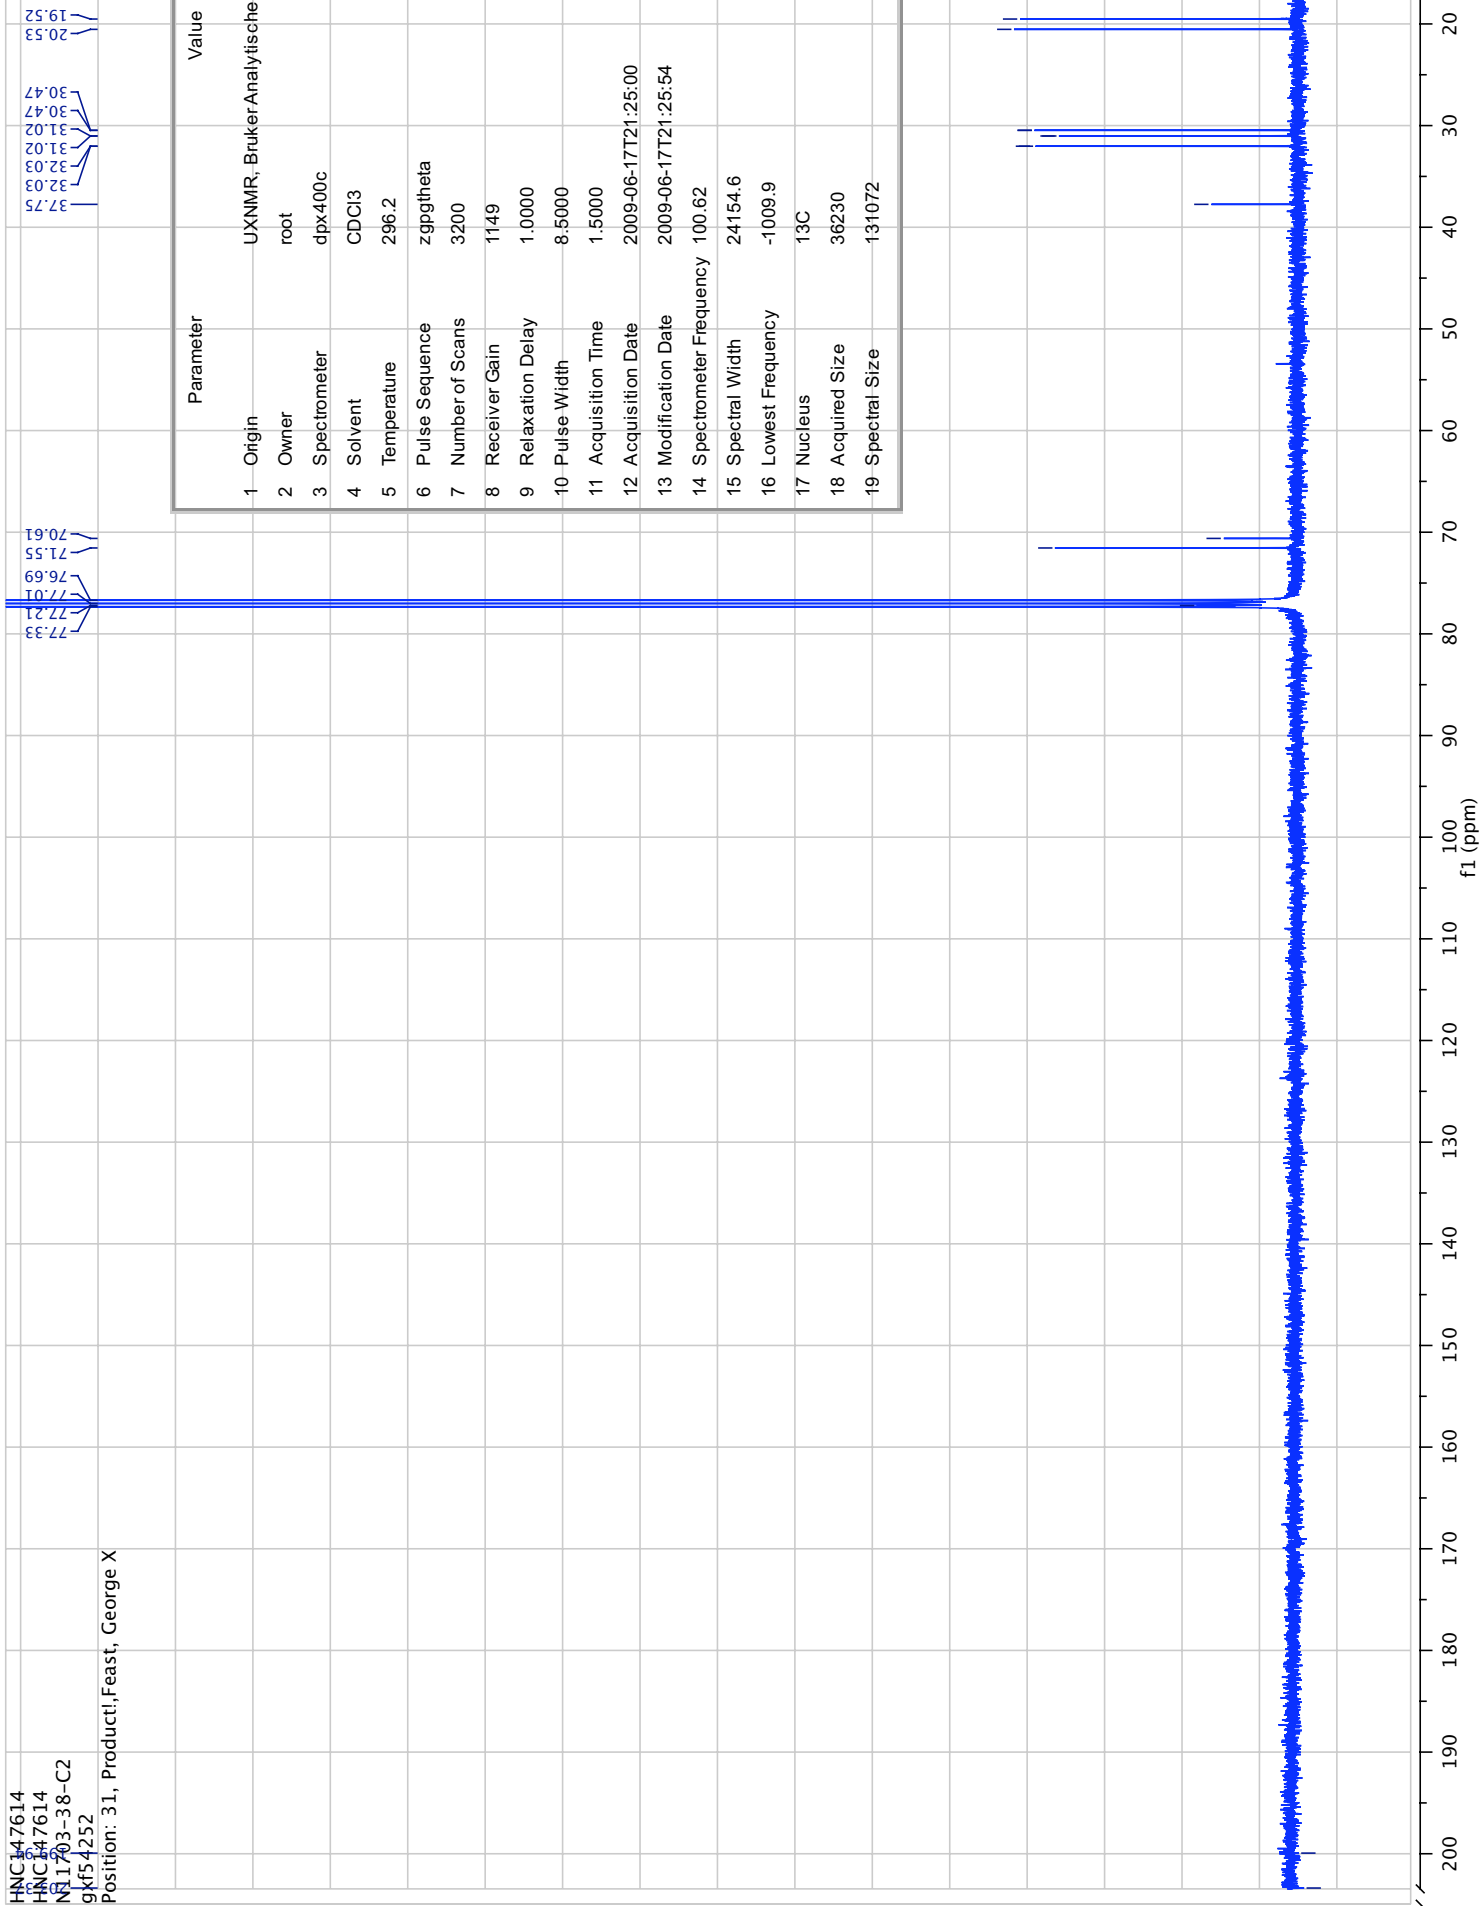

| Parameter                 | Value                                    |
|---------------------------|------------------------------------------|
| 1 Origin                  | UXNMR, Bruker Analytische Messtechnik Gm |
| 2 Owner                   | root                                     |
| 3 Spectrometer            | dpx400c                                  |
| 4 Solvent                 | CDCl <sub>3</sub>                        |
| 5 Temperature             | 296.2                                    |
| 6 Pulse Sequence          | zpggtheta                                |
| 7 Number of Scans         | 3200                                     |
| 8 Receiver Gain           | 1149                                     |
| 9 Relaxation Delay        | 1.0000                                   |
| 10 Pulse Width            | 8.5000                                   |
| 11 Acquisition Time       | 1.5000                                   |
| 12 Acquisition Date       | 2009-06-17T21:25:00                      |
| 13 Modification Date      | 2009-06-17T21:25:54                      |
| 14 Spectrometer Frequency | 100.62                                   |
| 15 Spectral Width         | 24154.6                                  |
| 16 Lowest Frequency       | -1009.9                                  |
| 17 Nucleus                | <sup>13</sup> C                          |
| 18 Acquired Size          | 36230                                    |
| 19 Spectral Size          | 131072                                   |

C13-(14)

HNH116902  
 HNH116902  
 N11703-38-C4  
 CXF54252

Position: 49, F27-30, Feast, George X

| Parameter                 | Value                                      |
|---------------------------|--------------------------------------------|
| 1 Origin                  | UXNMR, Bruker Analytische Messtechnik GmbH |
| 2 Owner                   | root                                       |
| 3 Spectrometer            | dpx400h                                    |
| 4 Solvent                 | CDCl3                                      |
| 5 Temperature             | 300.0                                      |
| 6 Pulse Sequence          | zgtheta                                    |
| 7 Number of Scans         | 32                                         |
| 8 Receiver Gain           | 114                                        |
| 9 Relaxation Delay        | 1.0000                                     |
| 10 Pulse Width            | 14.0000                                    |
| 11 Acquisition Time       | 4.0000                                     |
| 12 Acquisition Date       | 2009-06-18T19:43:00                        |
| 13 Modification Date      | 2009-06-18T19:44:04                        |
| 14 Spectrometer Frequency | 400.18                                     |
| 15 Spectral Width         | 7183.9                                     |
| 16 Lowest Frequency       | -590.6                                     |
| 17 Nucleus                | <sup>1</sup> H                             |
| 18 Acquired Size          | 28735                                      |
| 19 Spectral Size          | 65536                                      |

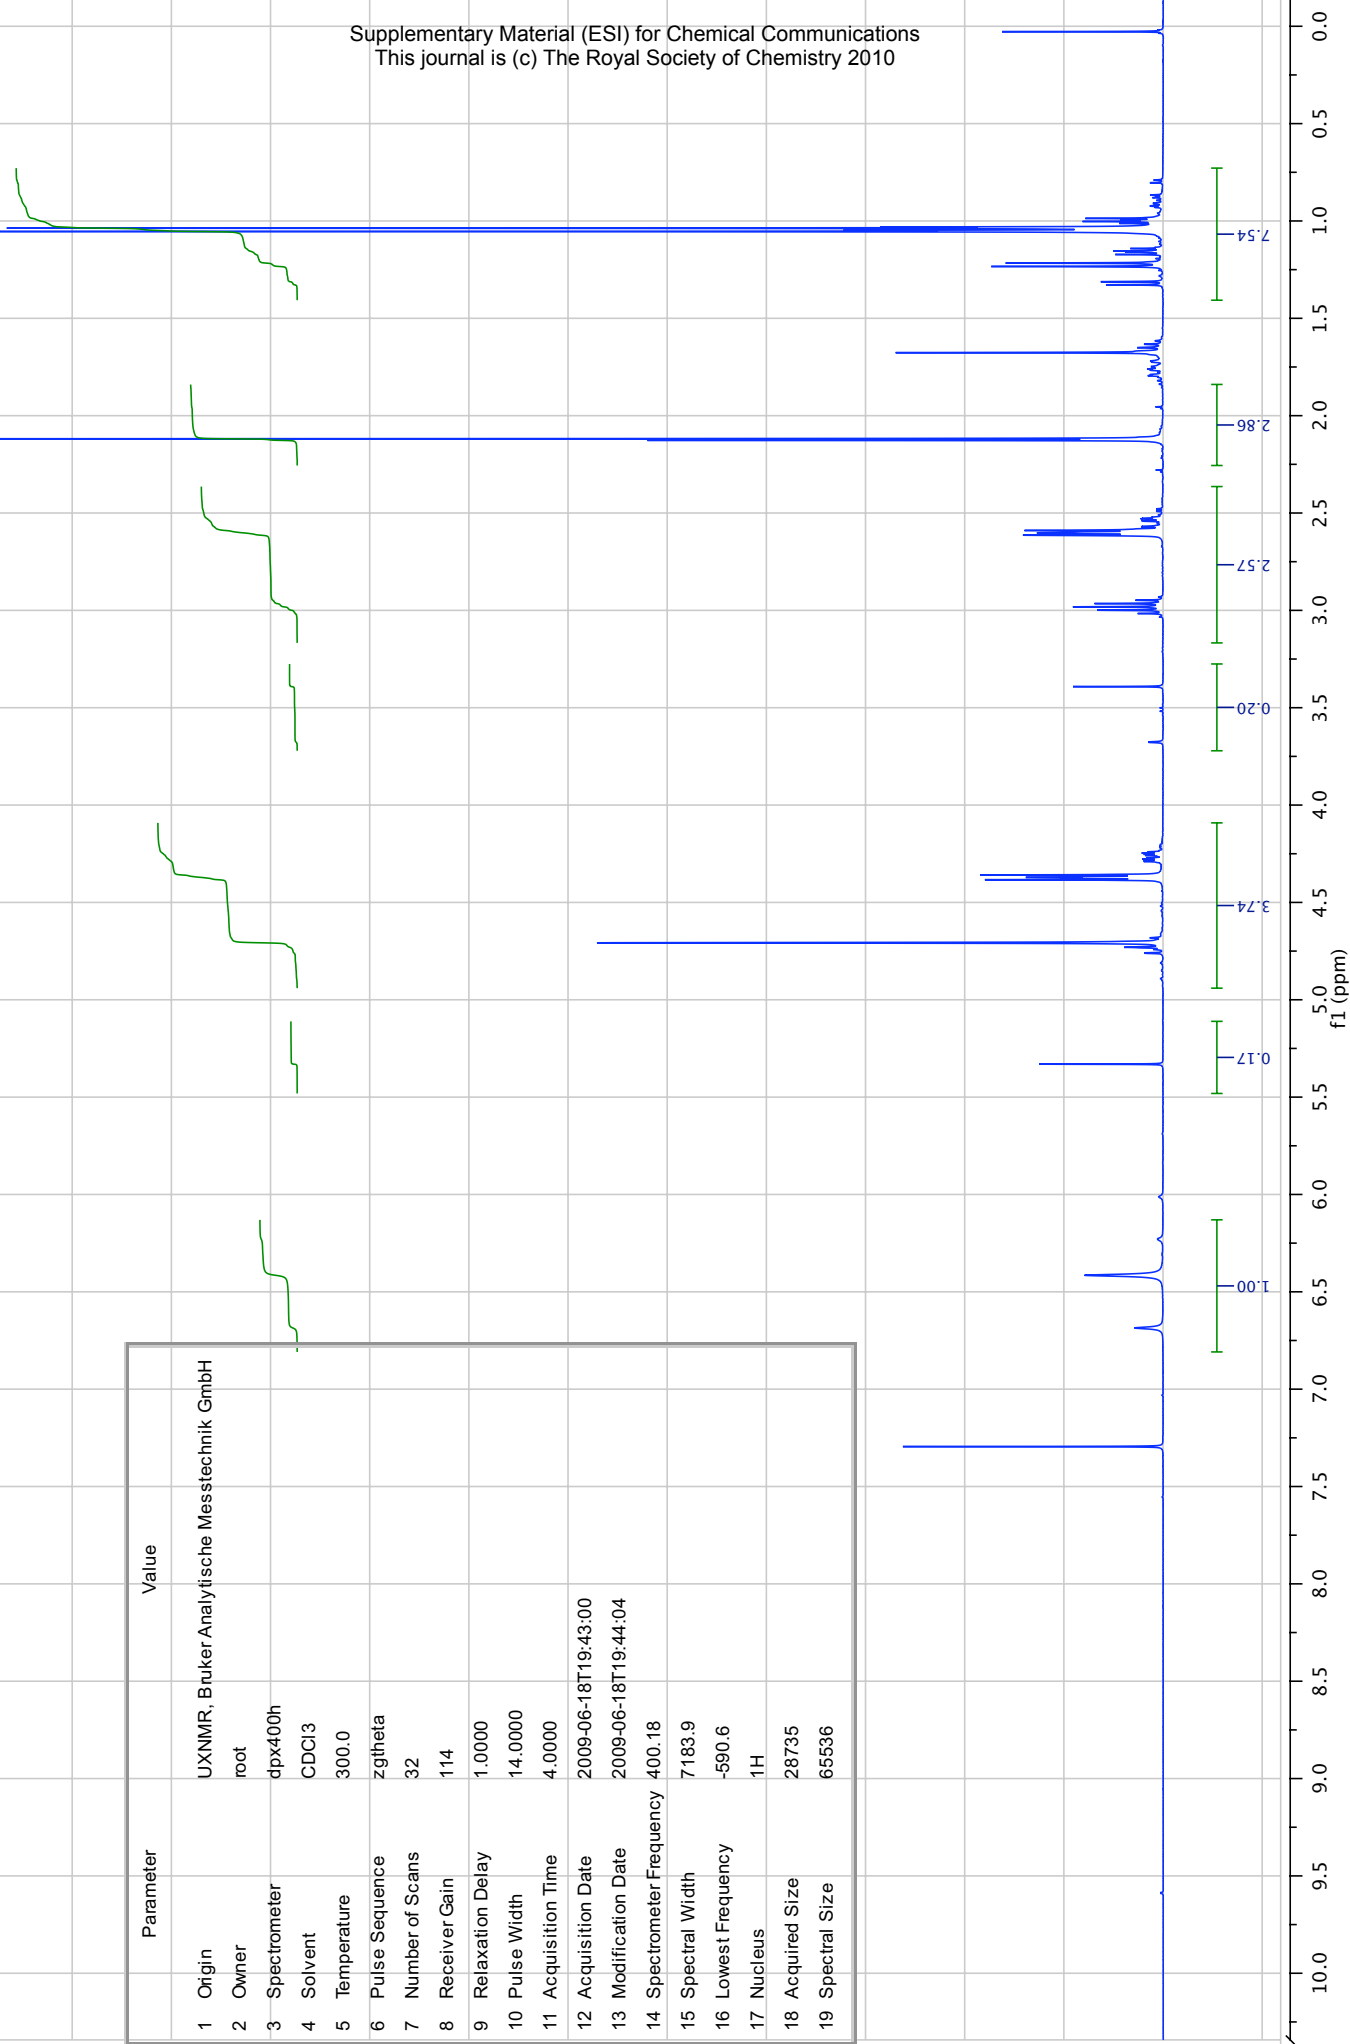

H1-(15)

HNH116902  
 HNH116902  
 N11703-38-C4  
 CXF54252  
 Position: 49, F27-30, ERROR

| Parameter                 | Value                                      |
|---------------------------|--------------------------------------------|
| 1 Origin                  | UXNMR, Bruker Analytische Messtechnik GmbH |
| 2 Owner                   | root                                       |
| 3 Spectrometer            | dpx400h                                    |
| 4 Solvent                 | CDCl3                                      |
| 5 Temperature             | 300.0                                      |
| 6 Pulse Sequence          | zgpgtheta                                  |
| 7 Number of Scans         | 3200                                       |
| 8 Receiver Gain           | 645                                        |
| 9 Relaxation Delay        | 1.0000                                     |
| 10 Pulse Width            | 10.0000                                    |
| 11 Acquisition Time       | 1.5000                                     |
| 12 Acquisition Date       | 2009-06-18T22:01:00                        |
| 13 Modification Date      | 2009-06-18T22:01:52                        |
| 14 Spectrometer Frequency | 100.64                                     |
| 15 Spectral Width         | 24154.6                                    |
| 16 Lowest Frequency       | -1008.5                                    |
| 17 Nucleus                | <sup>13</sup> C                            |
| 18 Acquired Size          | 36230                                      |
| 19 Spectral Size          | 131072                                     |

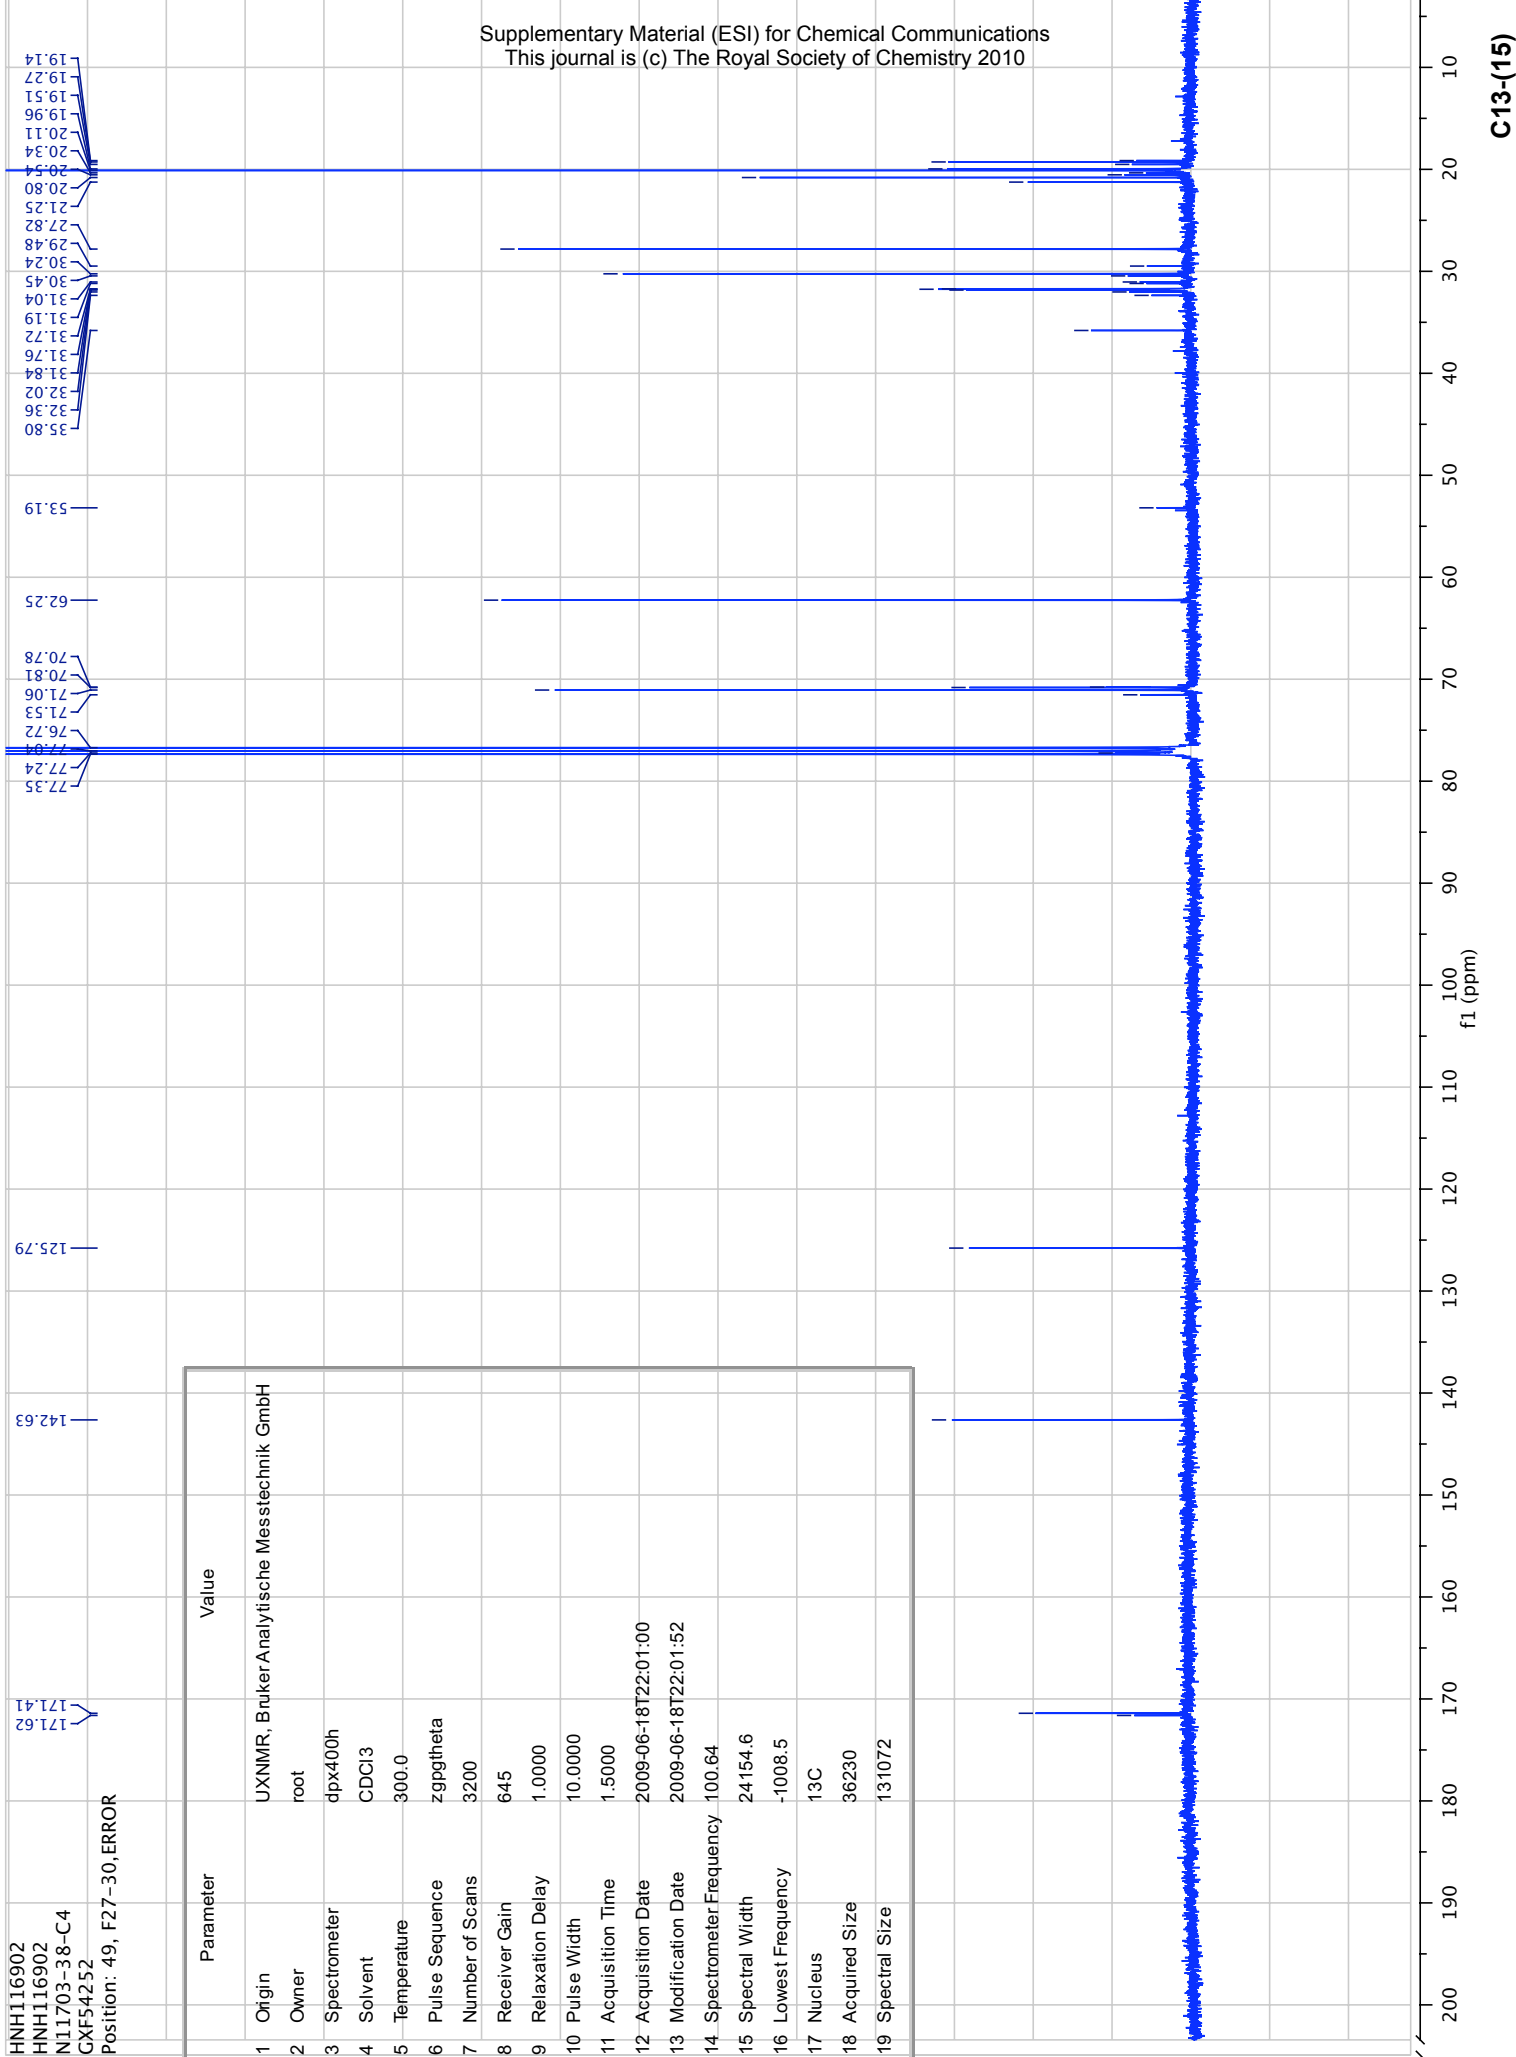

NMR@CHEM.OX

NAME Jan09-2009-17  
EXPNO 6  
PROCNO 1  
Date\_ 20090110  
Time 6.42  
INSTRUM av400  
PROBHD 5 mm QNP 1H/13  
PULPROG zg60  
TD 65536  
SOLVENT CDC13  
NS 16  
DS 2  
SWH 8278.146 Hz  
FIDRES 0.126314 Hz  
AQ 3.9584243 sec  
RG 90.5  
DW 60.400 usec  
DE 7.50 usec  
TE 294.4 K  
D1 1.00000000 sec

==== CHANNEL f1 =====  
NUC1 1H  
P1 9.00 usec  
PL1 0.00 dB  
SFO1 400.2024714 MHz  
SI 32768  
SF 400.2000028 MHz  
WDW EM  
SSB 0  
LB 0.30 Hz  
GB 0  
PC 1.00

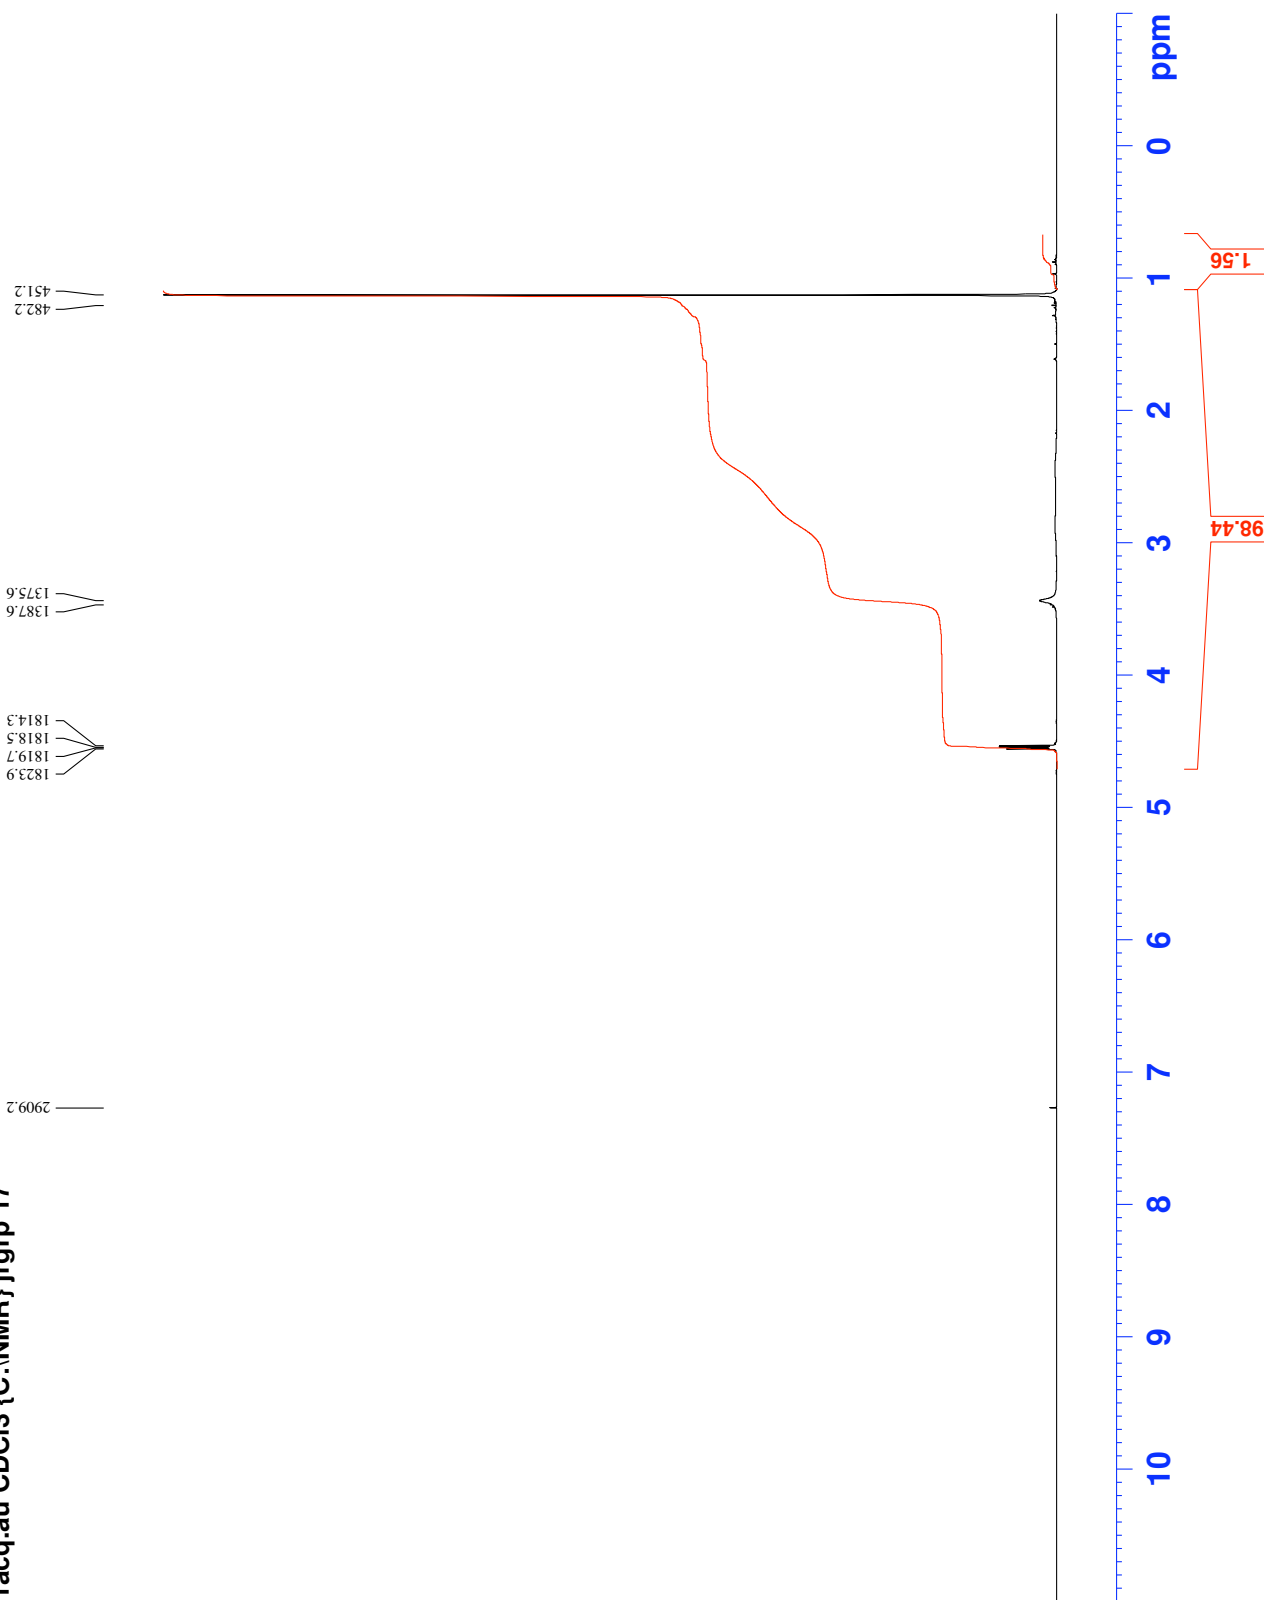

Instrument DQX400  
Chemist GCF  
Group JR  
3-78 F12  
h1acq.au CDC13 {C:\NMR} jrgpr 17



Jan09-2009-17  
NAME  
EXPNO 7  
PROCNO 1  
Date\_ 20090110  
Time 6.50  
INSTRUM av400  
PROBHD 5 mm QNP 1H/13  
PULPROG zgpg30  
TD 32768  
SOLVENT CDCl3  
NS 256  
DS 4  
SWH 26178.010 Hz  
FIDRES 0.798889 Hz  
AQ 0.6259188 sec  
RG 32768  
DW 19.100 usec  
DE 7.50 usec  
TE 294.7 K  
D1 1.00000000 sec  
D11 0.03000000 sec  
TD0 1  
==== CHANNEL f1 =====  
NUC1 13C  
P1 9.50 usec  
PL1 0.00 dB  
SFO1 100.6403931 MHz  
==== CHANNEL f2 =====  
CPDPRG2 waltz16  
NUC2 1H  
PCPD2 80.00 usec  
PL2 0.00 dB  
PL12 19.00 dB  
PL13 25.00 dB  
SFO2 400.2016008 MHz  
SI 32768  
SF 100.6303718 MHz  
WDW EM  
SSB 0  
LB 1.00 Hz  
GB 0  
PC 1.40

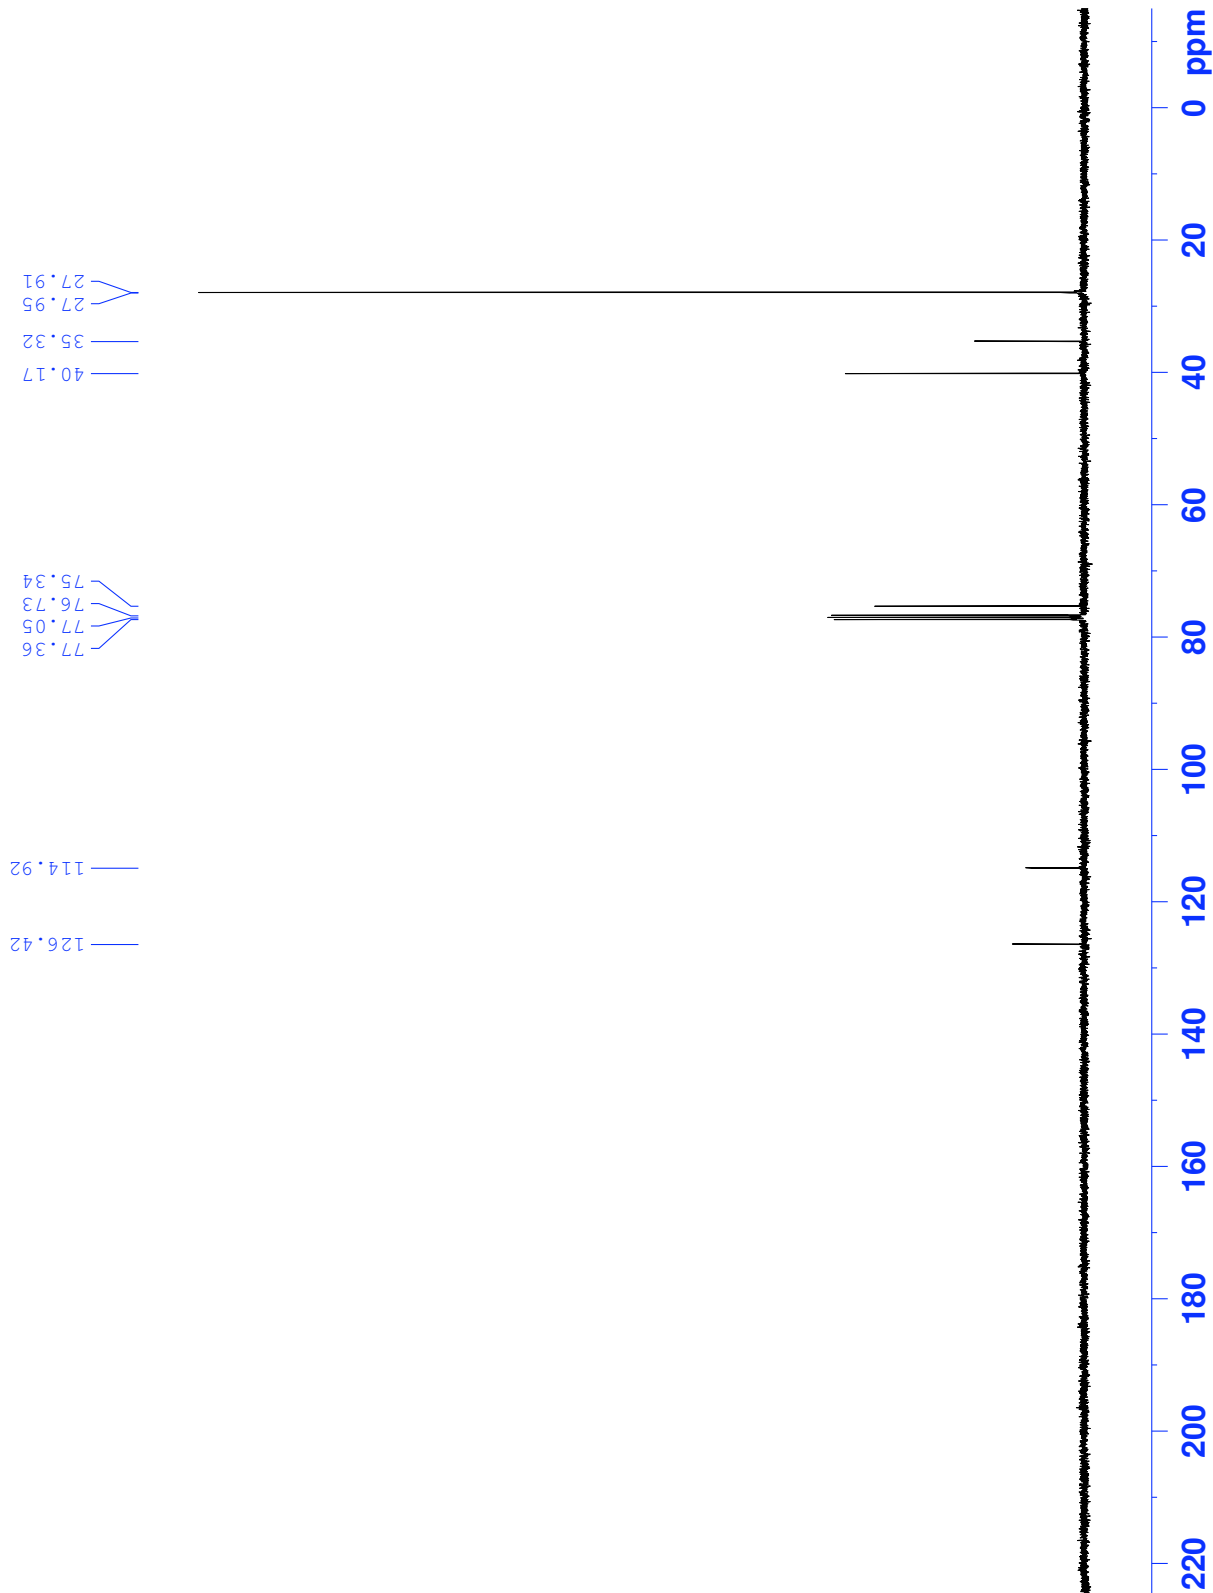

Instrument DQX400  
Chemist GCF  
Group JR  
3-78 F12  
c13acq.au CDCl3 {C:NMR} jrgp 17



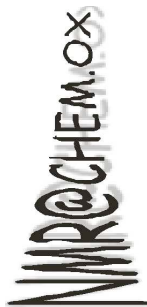

NAME gf26061201  
EXPNO 1  
PROCNO 1  
Date\_ 20090113  
Time 15.23  
INSTRUM avc500  
PROBHD 5 mm CPDUL 13C  
PULPROG zg30  
TD 65536  
SOLVENT CDCl3  
NS 16  
DS 2  
SWH 10330.578 Hz  
FIDRES 0.157632 Hz  
AQ 3.1719923 sec  
RG 4  
DW 48.400 usec  
DE 6.00 usec  
TE 298.0 K  
D1 1.0000000 sec  
TD0 1  
==== CHANNEL f1 =====  
NUC1 1H  
P1 9.60 usec  
PL1 -6.00 dB  
PL1W 15.19999981 W  
SFO1 500.3030896 MHz  
SI 32768  
SF 500.3000240 MHz  
WDW EM  
SSB 0  
LB 0.30 Hz  
GB 0  
PC 1.00

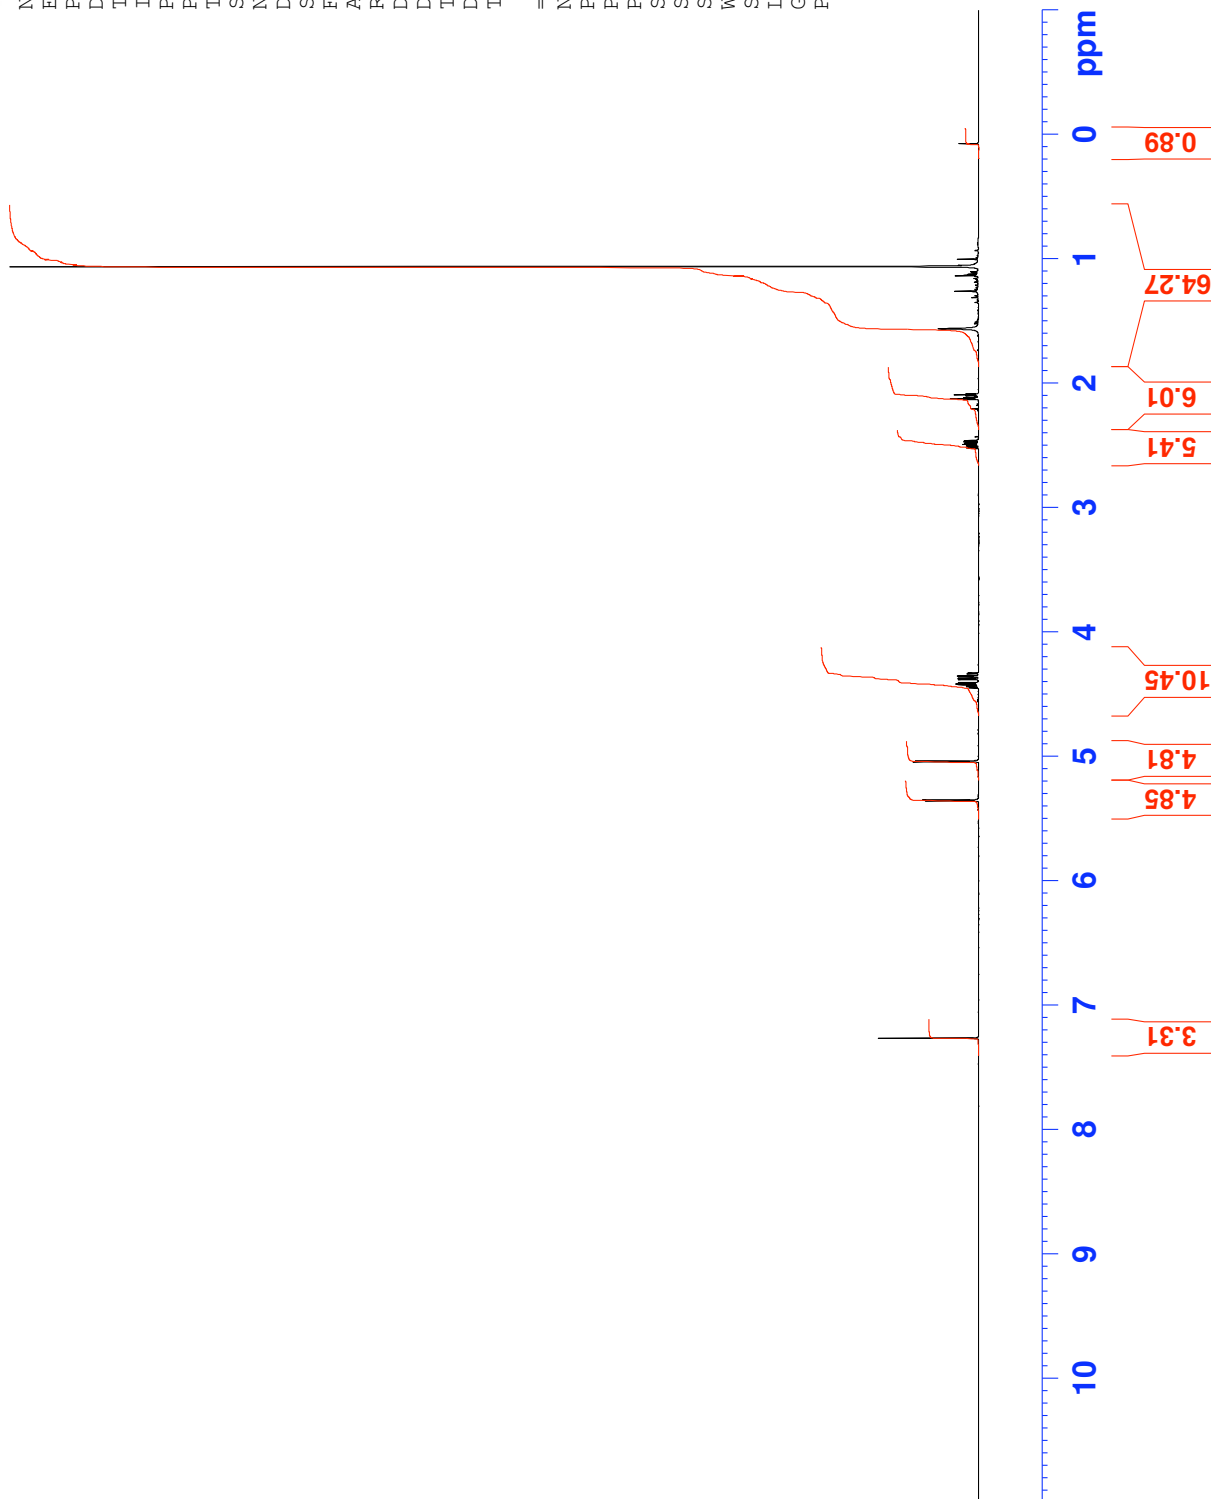

Instrument AVC500  
2606 George Feast 12/1/09

NMR@CHEM.OX

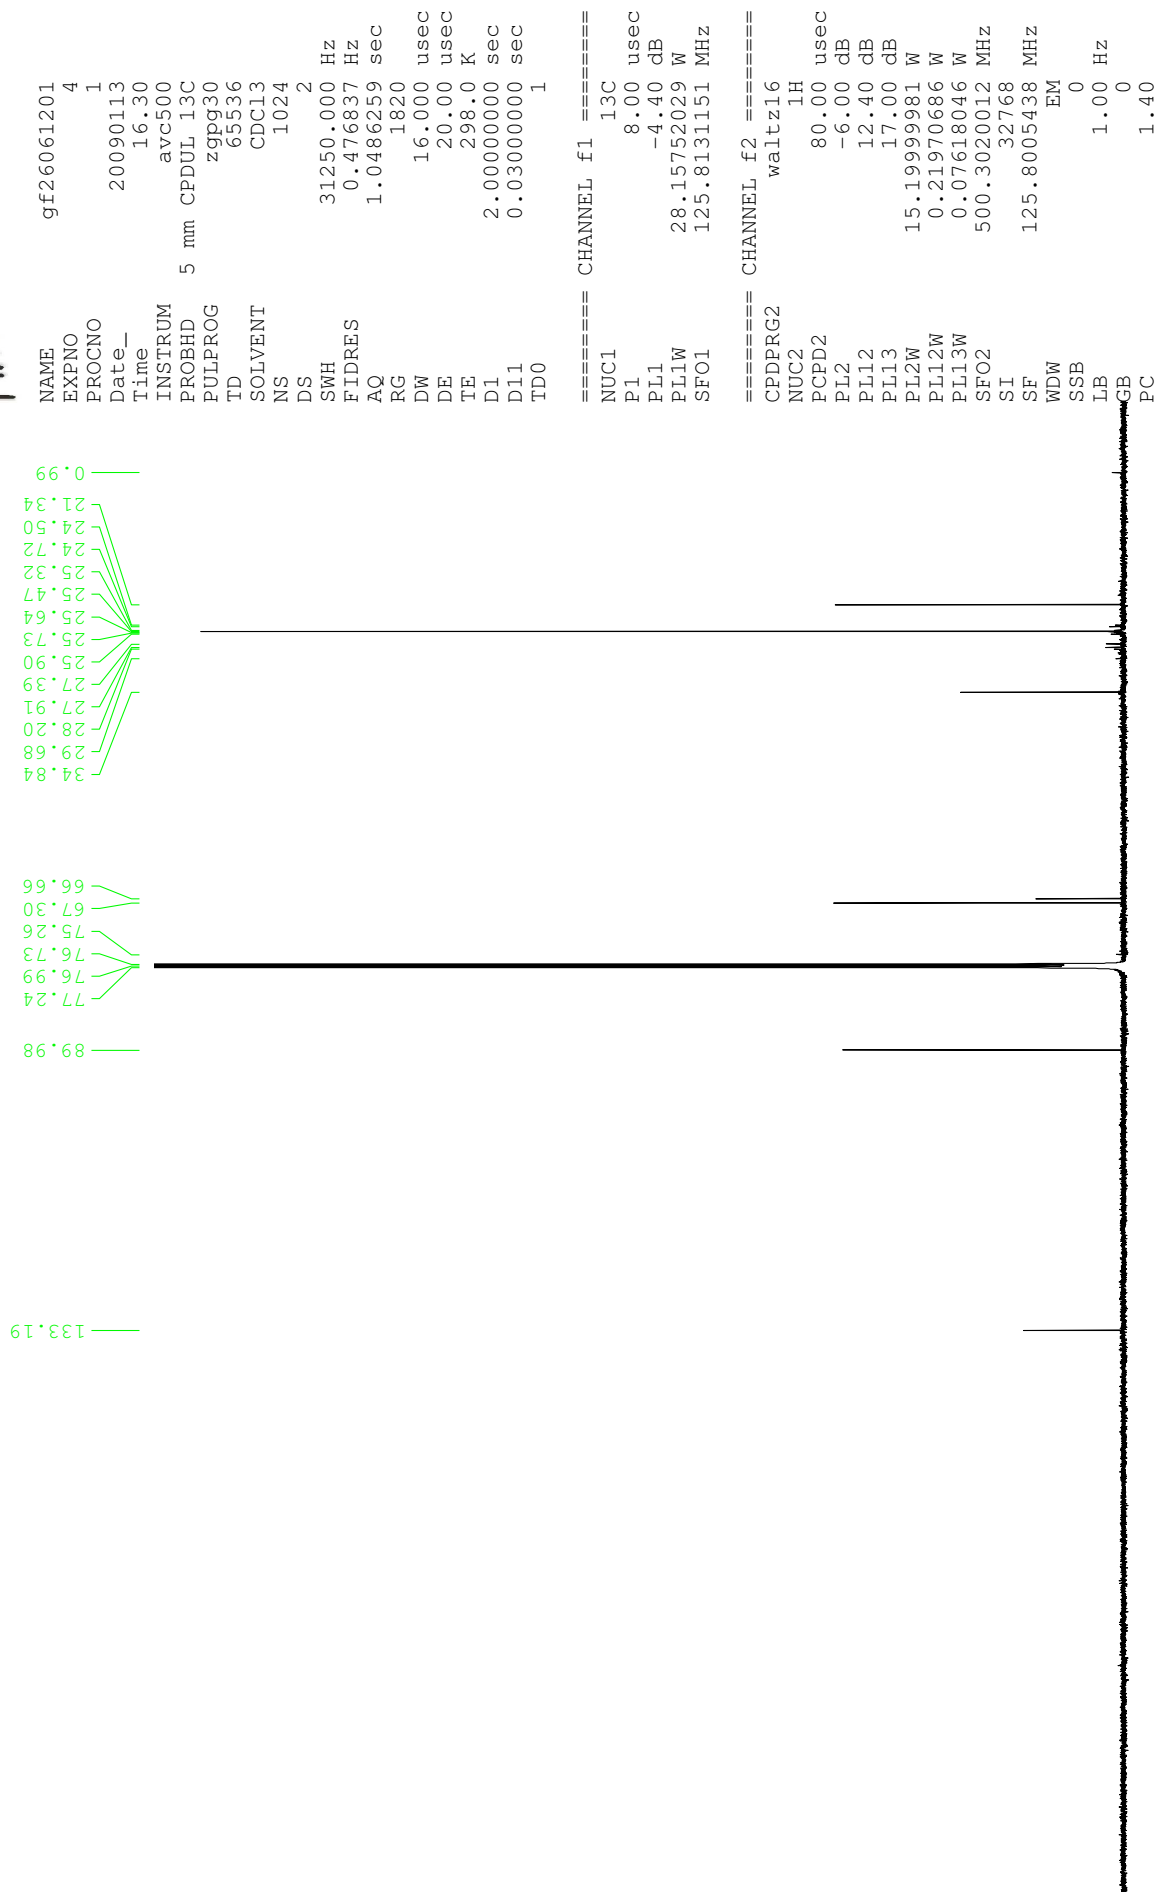

Instrument AVC500  
6328 George Feast 21/10/09

NMR@CHEM.OX

```
NAME          gf63282110
EXPNO         1
PROCNO        1
Date_         20091022
Time          3.09
INSTRUM       avc500
PROBHD        5 mm CPDUL 13C
PULPROG       zg30
TD            65536
SOLVENT       CDCl3
NS            16
DS            2
SWH           10330.578 Hz
FIDRES        0.157632 Hz
AQ            3.1719923 sec
RG            4
DW            48.400 usec
DE            6.00 usec
TE            298.0 K
D1            1.00000000 sec
TD0           1

===== CHANNEL f1 =====
NUC1          1H
P1            9.60 usec
PL1          -6.00 dB
PL1W         15.19999981 W
SFO1         500.3030896 MHz
SI           32768
SF           500.3000240 MHz
WDW          EM
SSB          0
LB           0.30 Hz
GB           0
PC           1.00
```

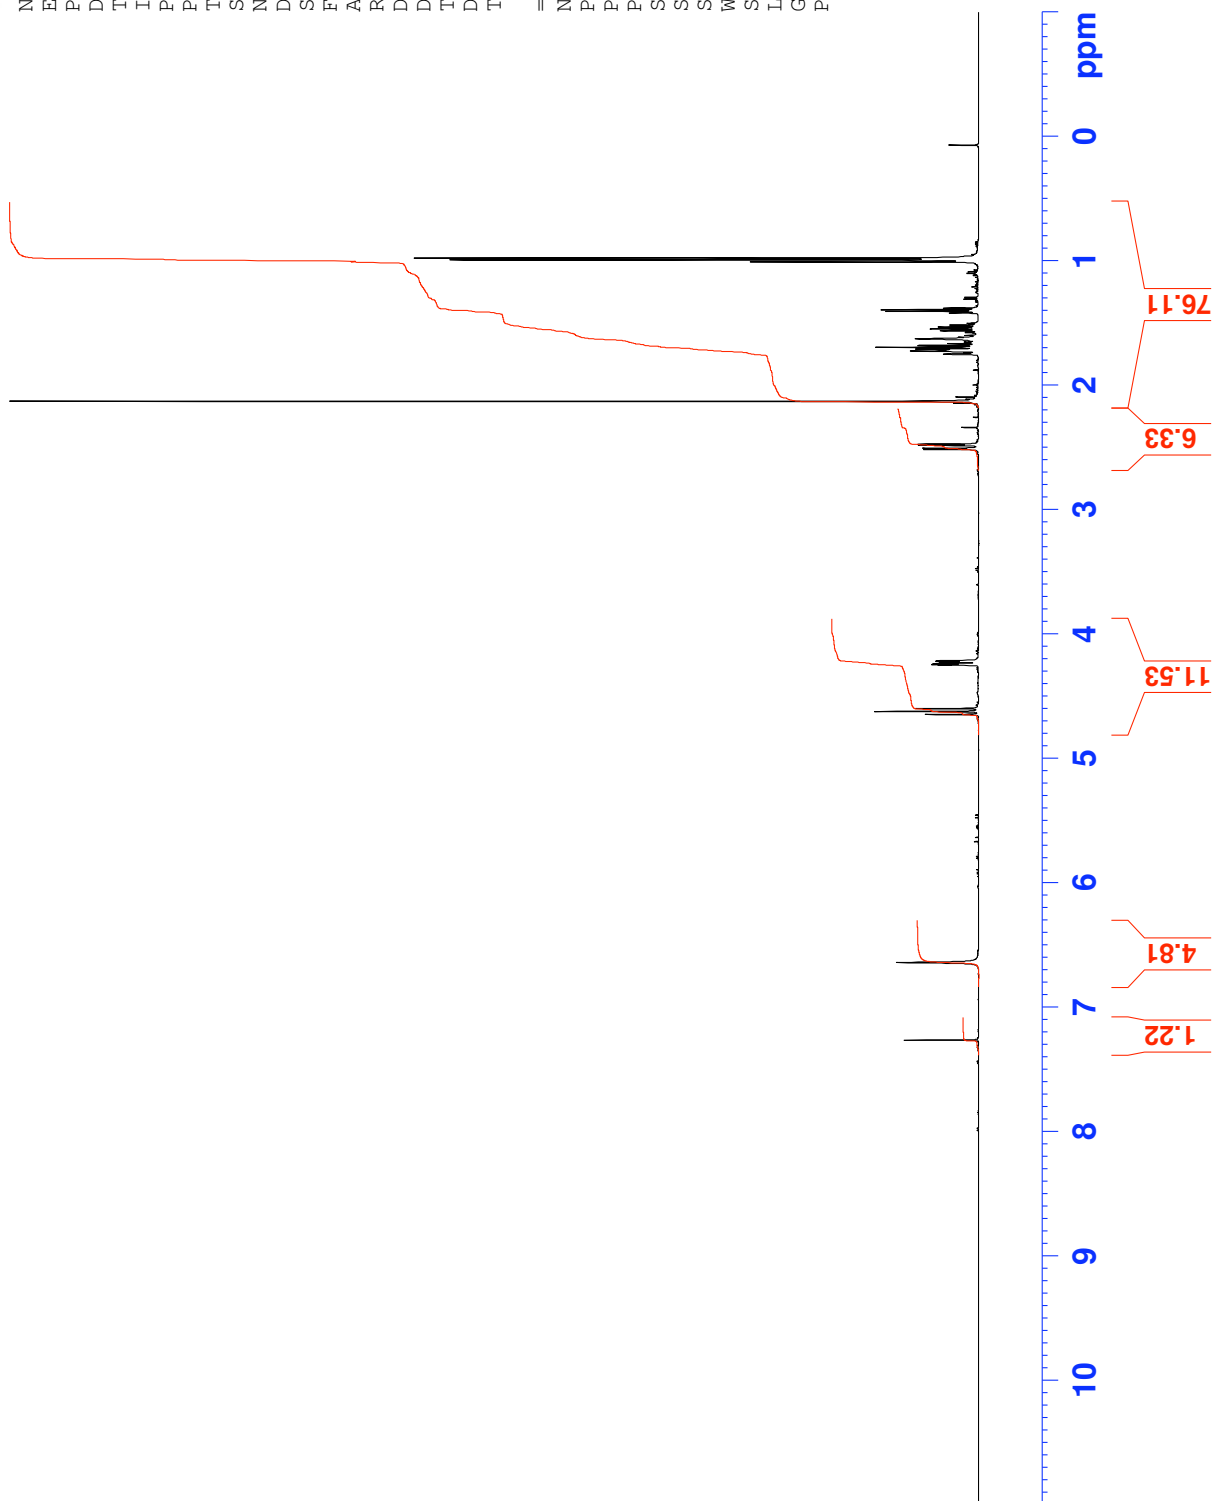

Instrument AVC500  
6328 George Feast 21/10/09

NMR@CHEM.OX

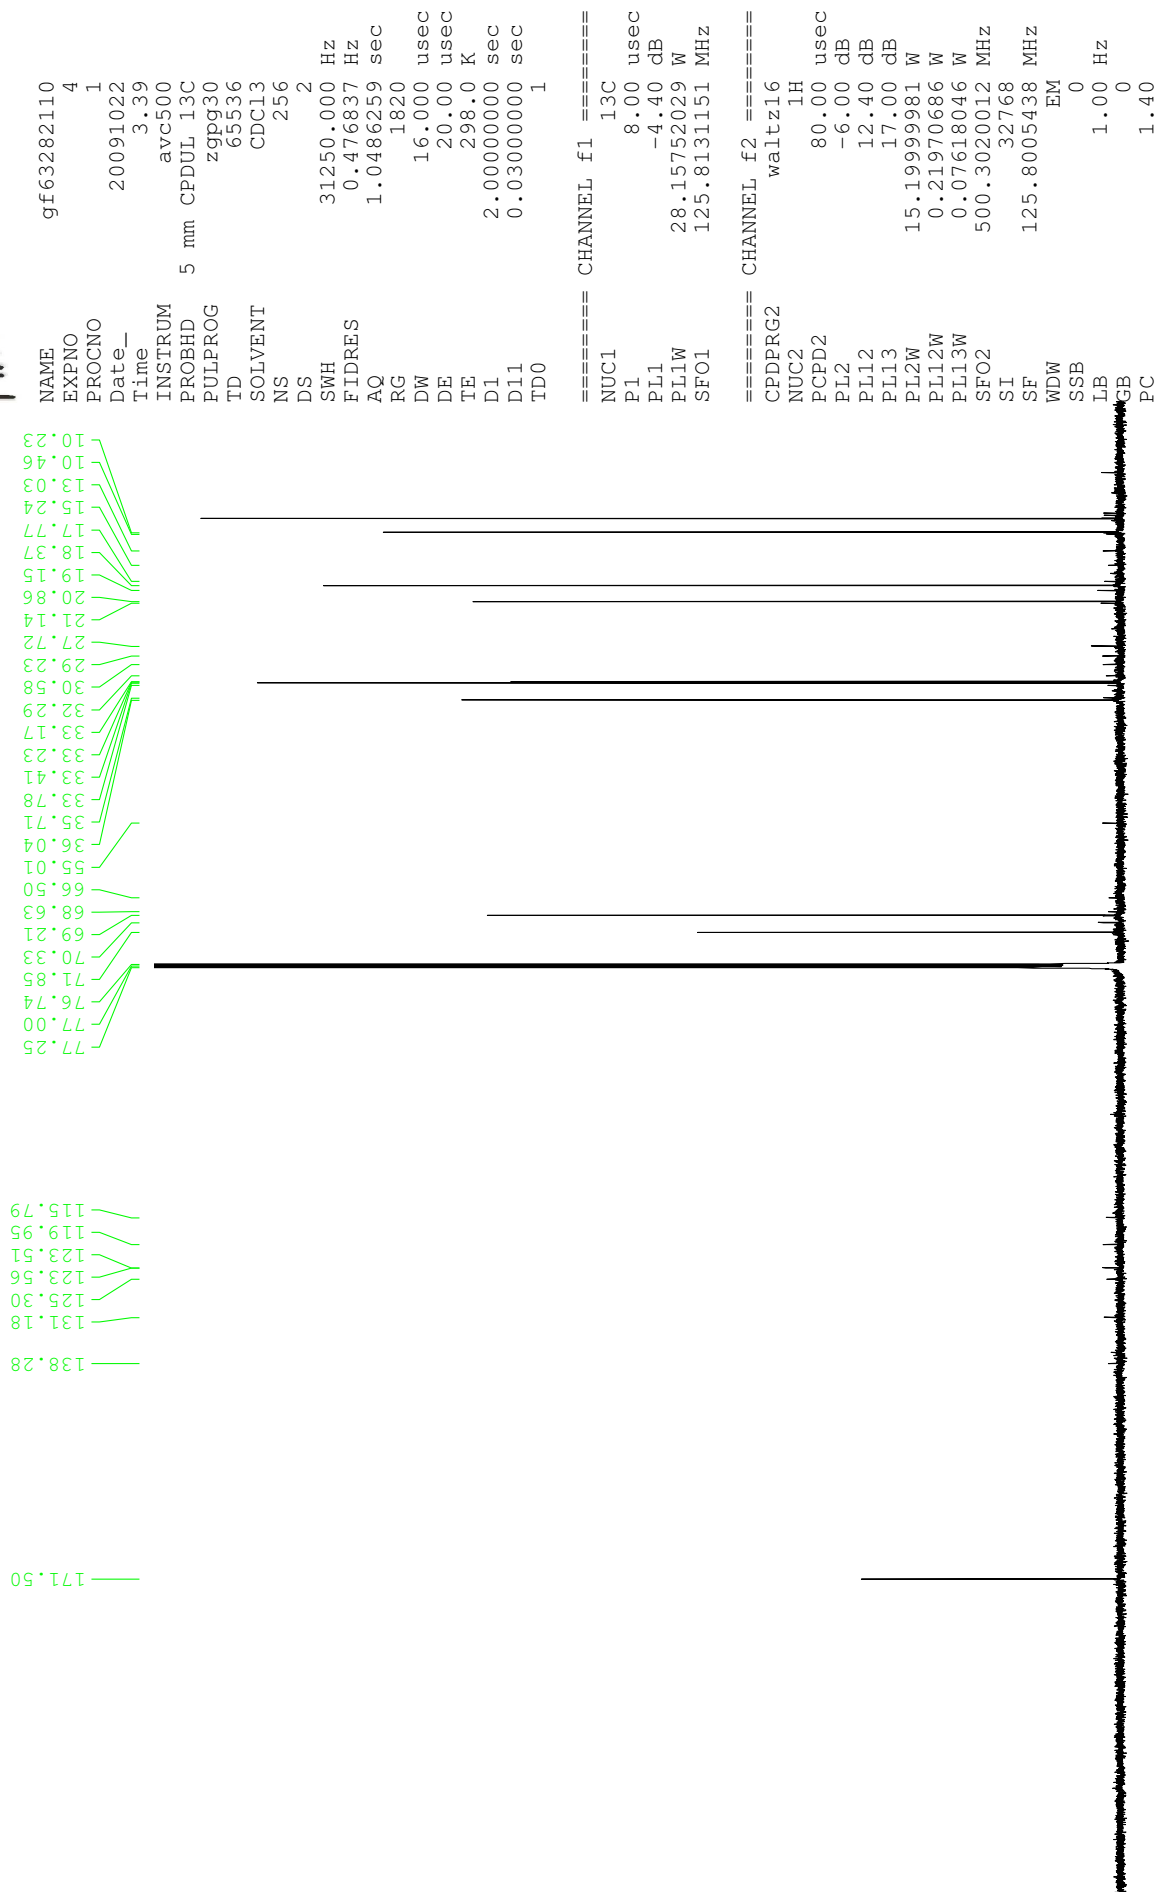

Instrument AVC500  
6329 George Feast 21/10/09

NMR@CHEM.OX

```
NAME          gf63292110
EXPNO         1
PROCNO       1
Date_        20091022
Time         3.43
INSTRUM      avc500
PROBHD       5 mm CPDUL 13C
PULPROG      zg30
TD           65536
SOLVENT      CDCl3
NS           16
DS           2
SWH          10330.578 Hz
FIDRES       0.157632 Hz
AQ           3.1719923 sec
RG           4
DW           48.400 usec
DE           6.00 usec
TE           298.0 K
D1           1.00000000 sec
TD0          1

===== CHANNEL f1 =====
NUC1         1H
P1           9.60 usec
PL1         -6.00 dB
PL1W        15.19999981 W
SFO1        500.3030896 MHz
SI          32768
SF          500.3000240 MHz
WDW         EM
SSB         0
LB          0.30 Hz
GB          0
PC          1.00
```

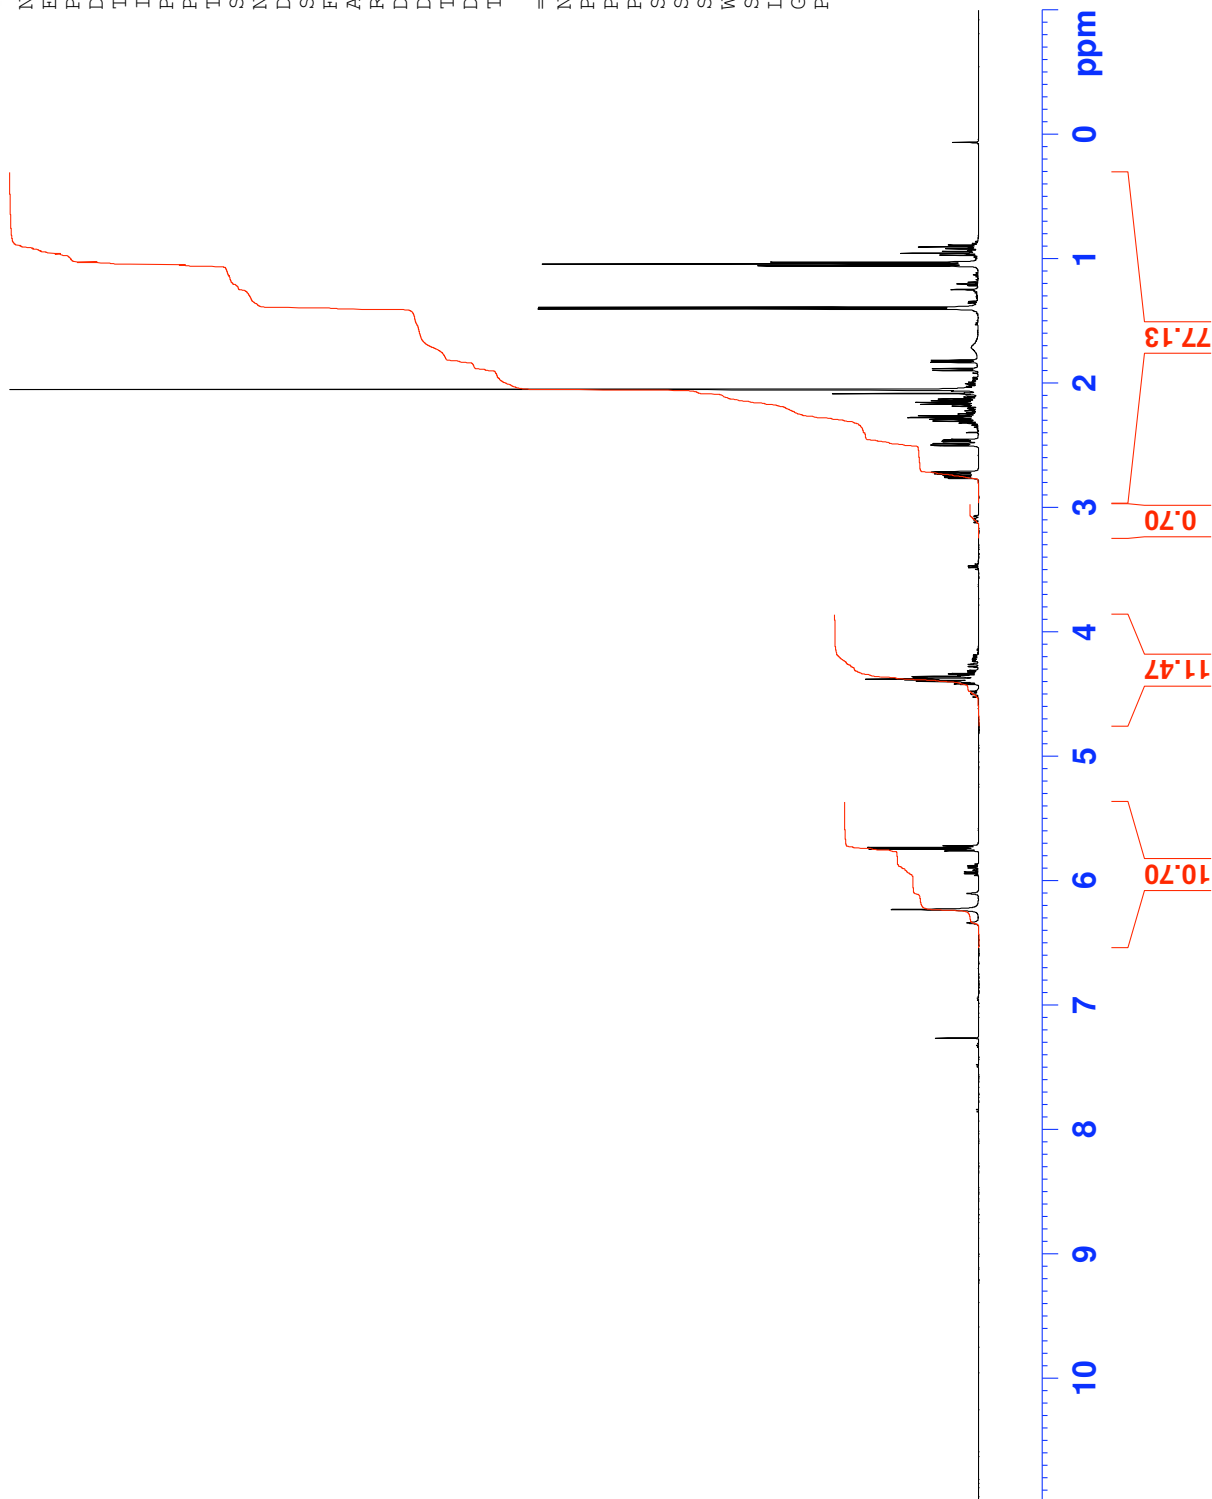

Instrument AVC500  
6329 George Feast 21/10/09

NMR@CHEM.OX

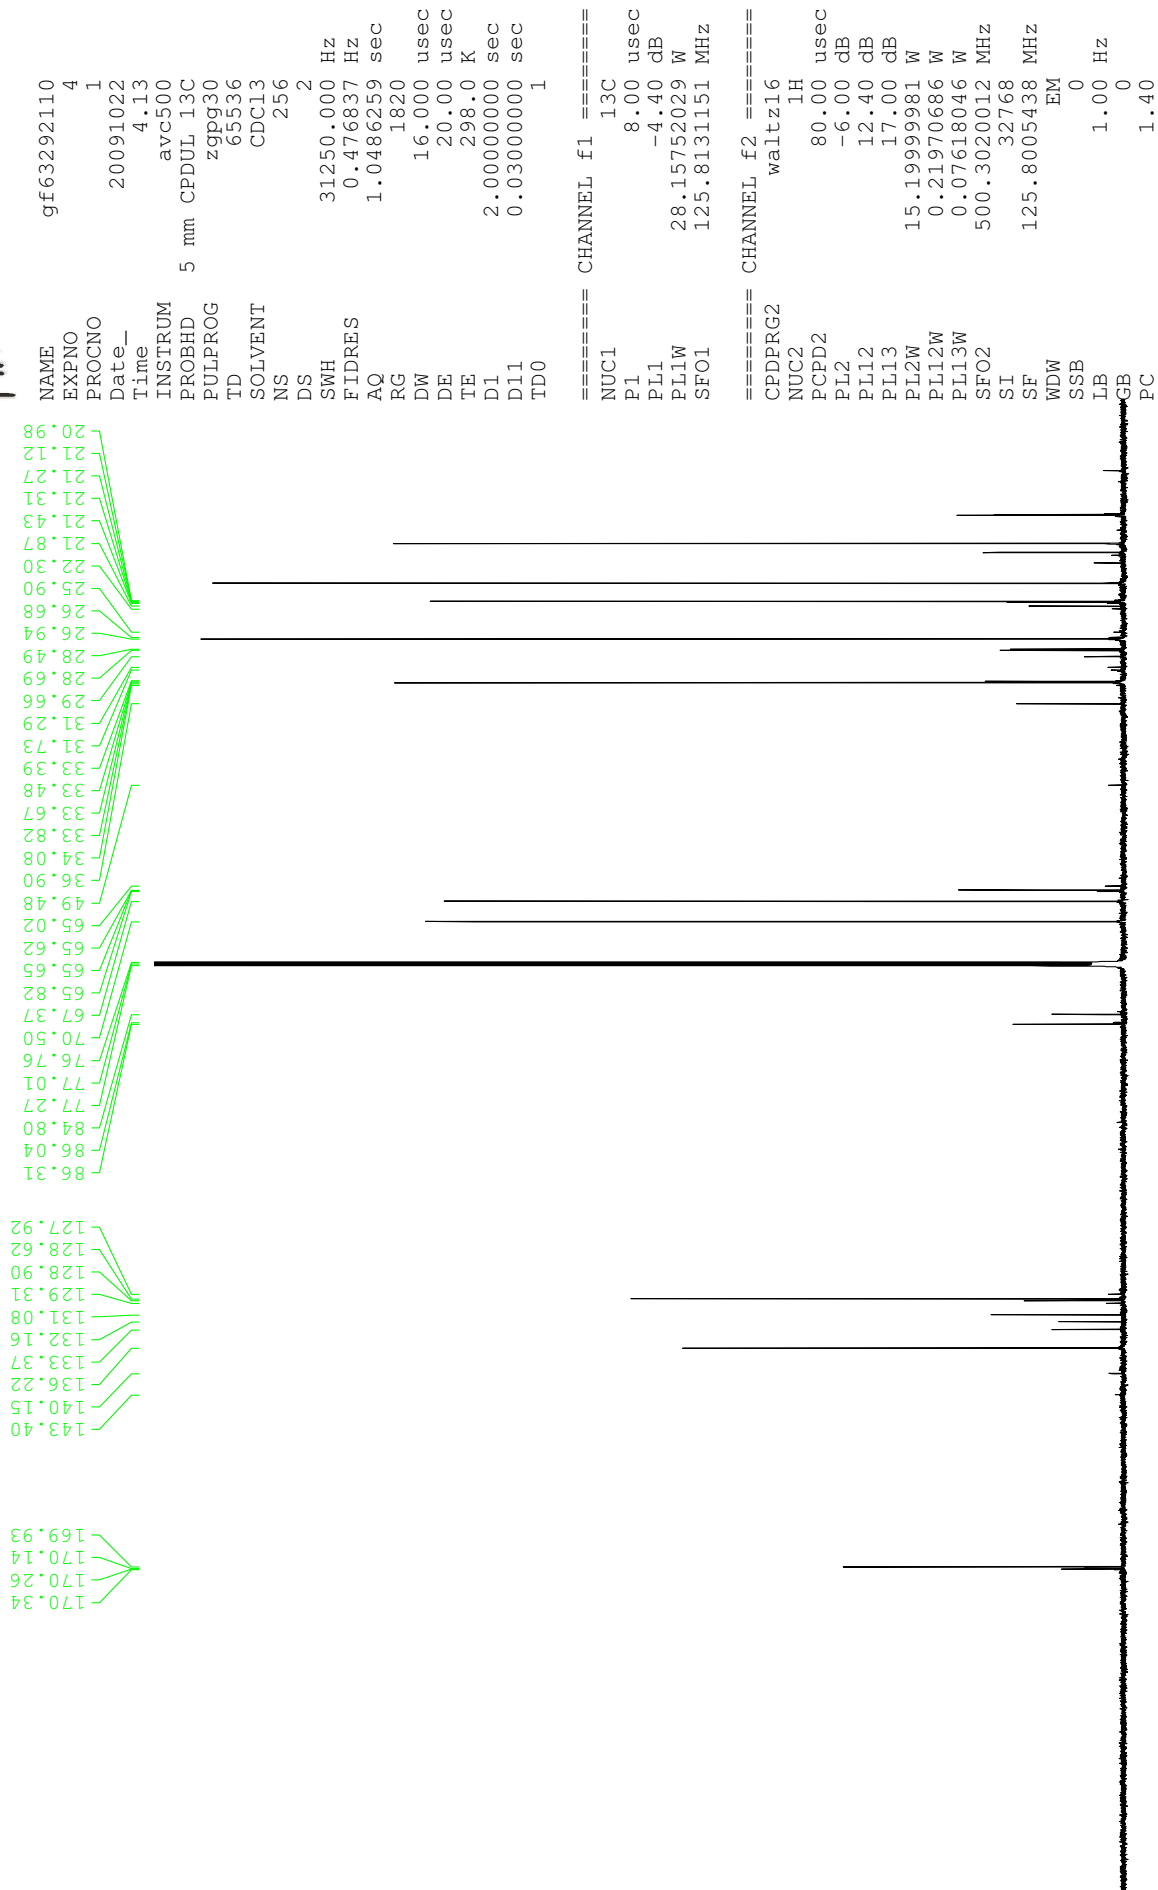

Instrument AVC500  
5629 George Feast 20/8/09

NMR@CHEM.OX

```
NAME          gf56292008
EXPNO         1
PROCNO        1
Date_         20090820
Time          10.33
INSTRUM       avc500
PROBHD        5 mm CPDUL 13C
PULPROG       zg30
TD            65536
SOLVENT       CDC13
NS            16
DS            2
SWH           10330.578 Hz
FIDRES        0.157632 Hz
AQ            3.1719923 sec
RG            4
DW            48.400 usec
DE            6.00 usec
TE            298.0 K
D1            1.00000000 sec
TD0           1

===== CHANNEL f1 =====
NUC1          1H
P1            9.60 usec
PL1          -6.00 dB
PL1W         15.19999981 W
SFO1         500.3030896 MHz
SI           32768
SF           500.3000240 MHz
WDW          EM
SSB          0
LB           0.30 Hz
GB           0
PC           1.00
```

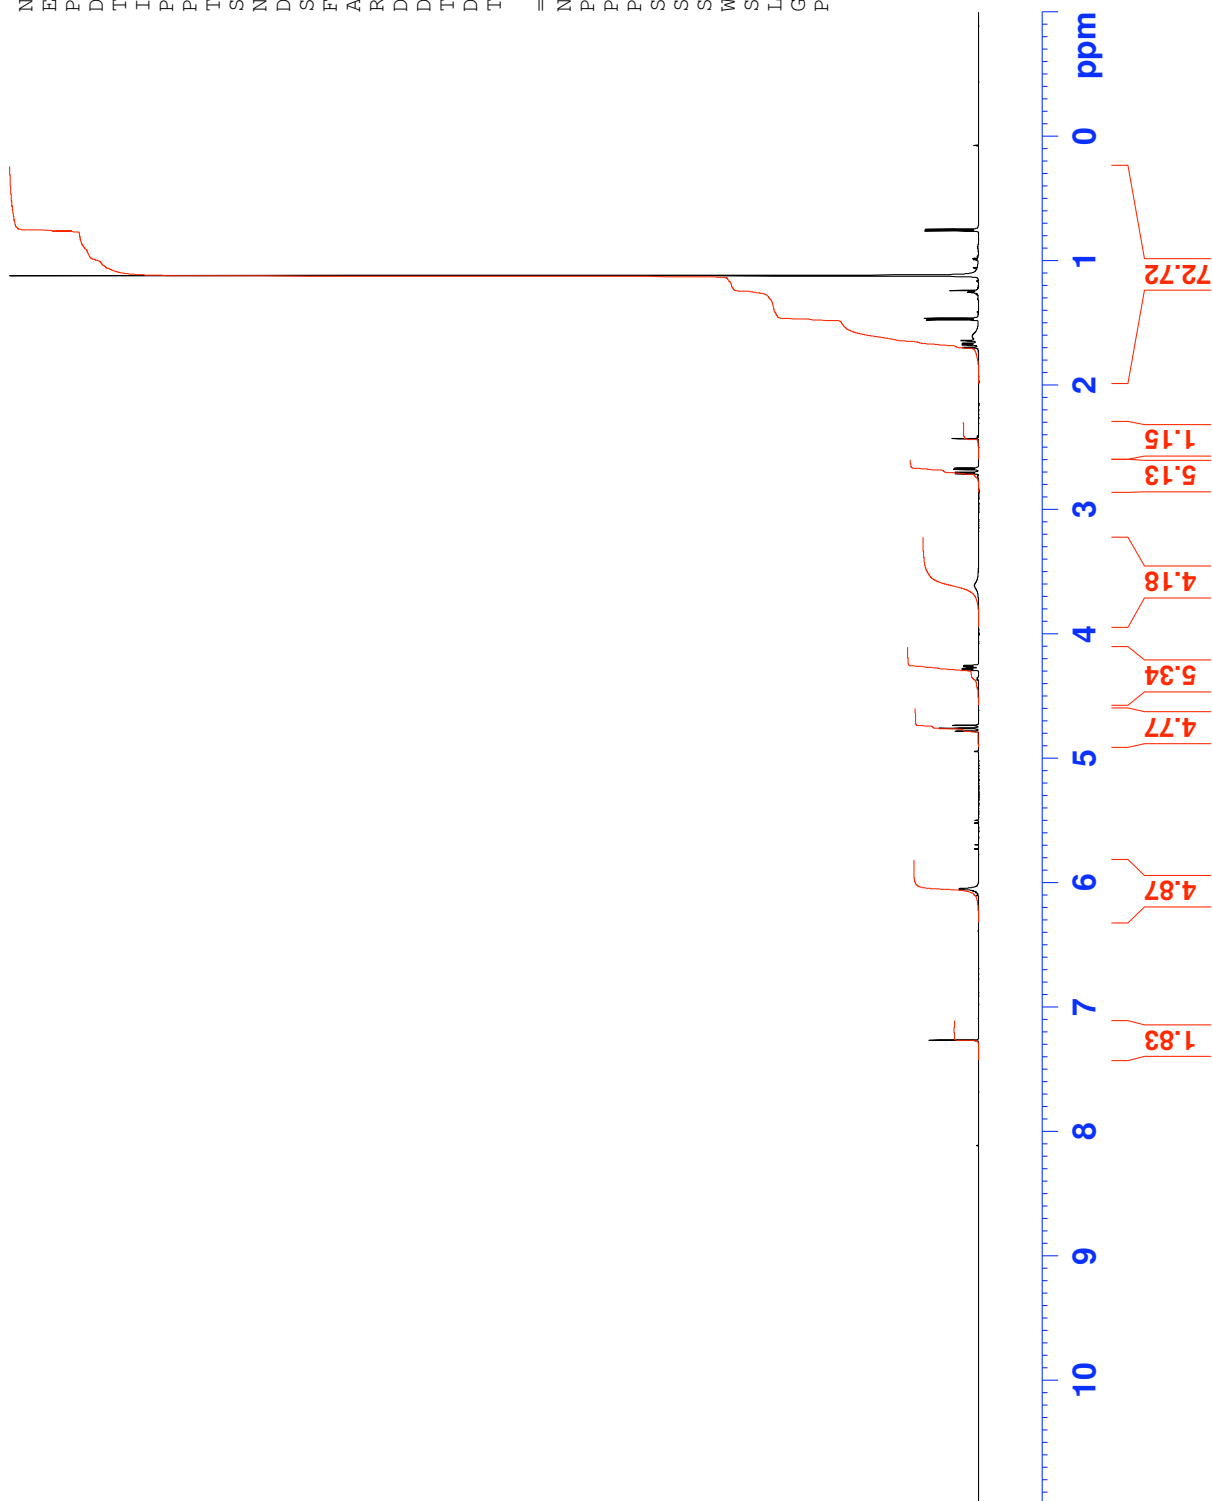

Instrument AVC500  
5629 George Feast 20/8/09

NMR@CHEM.OX

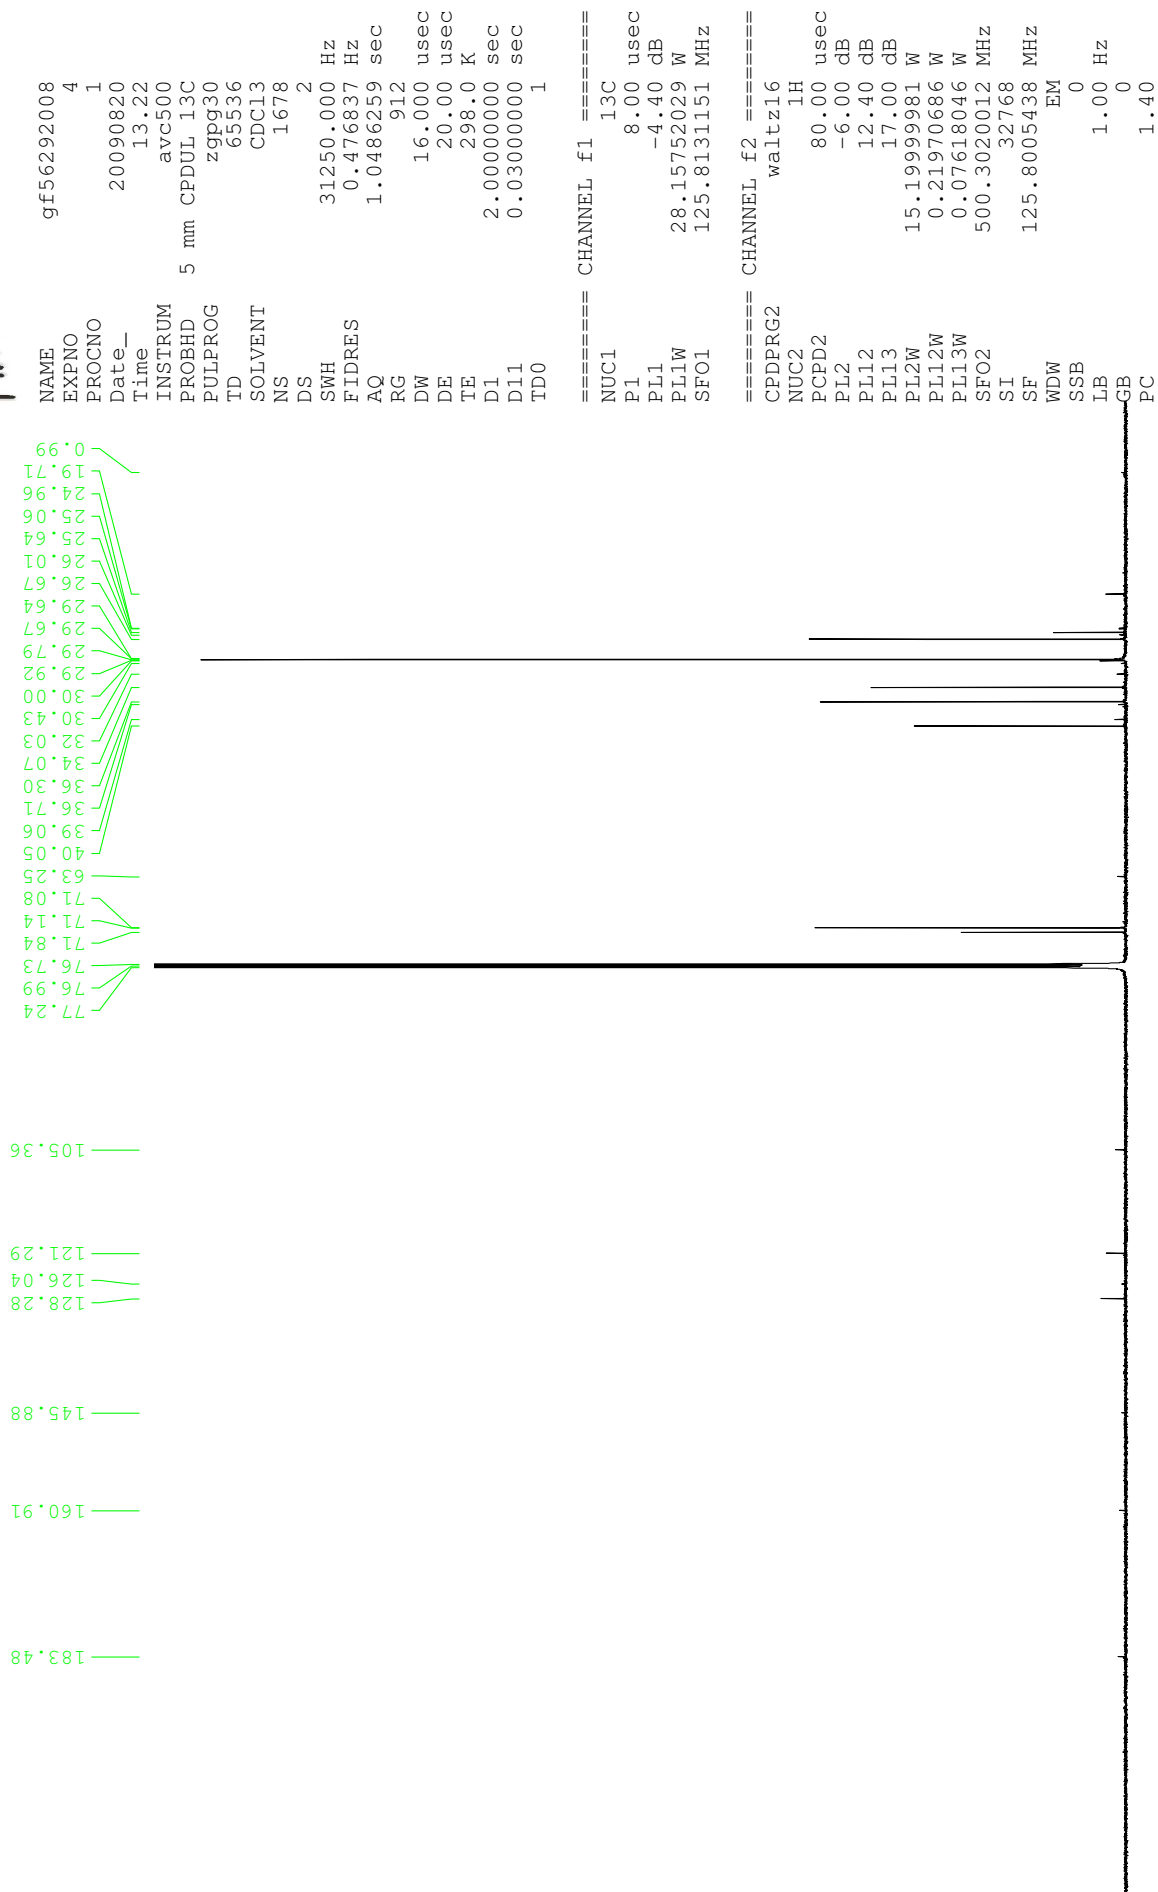



NAME gf54770608  
EXPNO 1  
PROCNO 1  
Date\_ 20090806  
Time 22.33  
INSTRUM avc500  
PROBHD 5 mm CPDUL 13C  
PULPROG zg30  
TD 65536  
SOLVENT CDC13  
NS 16  
DS 2  
SWH 10330.578 Hz  
FIDRES 0.157632 Hz  
AQ 3.1719923 sec  
RG 4  
DW 48.400 usec  
DE 6.00 usec  
TE 298.0 K  
D1 1.0000000 sec  
TD0 1  
===== CHANNEL f1 =====  
NUC1 1H  
P1 9.60 usec  
PL1 -6.00 dB  
PL1W 15.19999981 W  
SFO1 500.3030896 MHz  
SI 32768  
SF 500.3000240 MHz  
WDW EM  
SSB 0  
LB 0.30 Hz  
GB 0  
PC 1.00

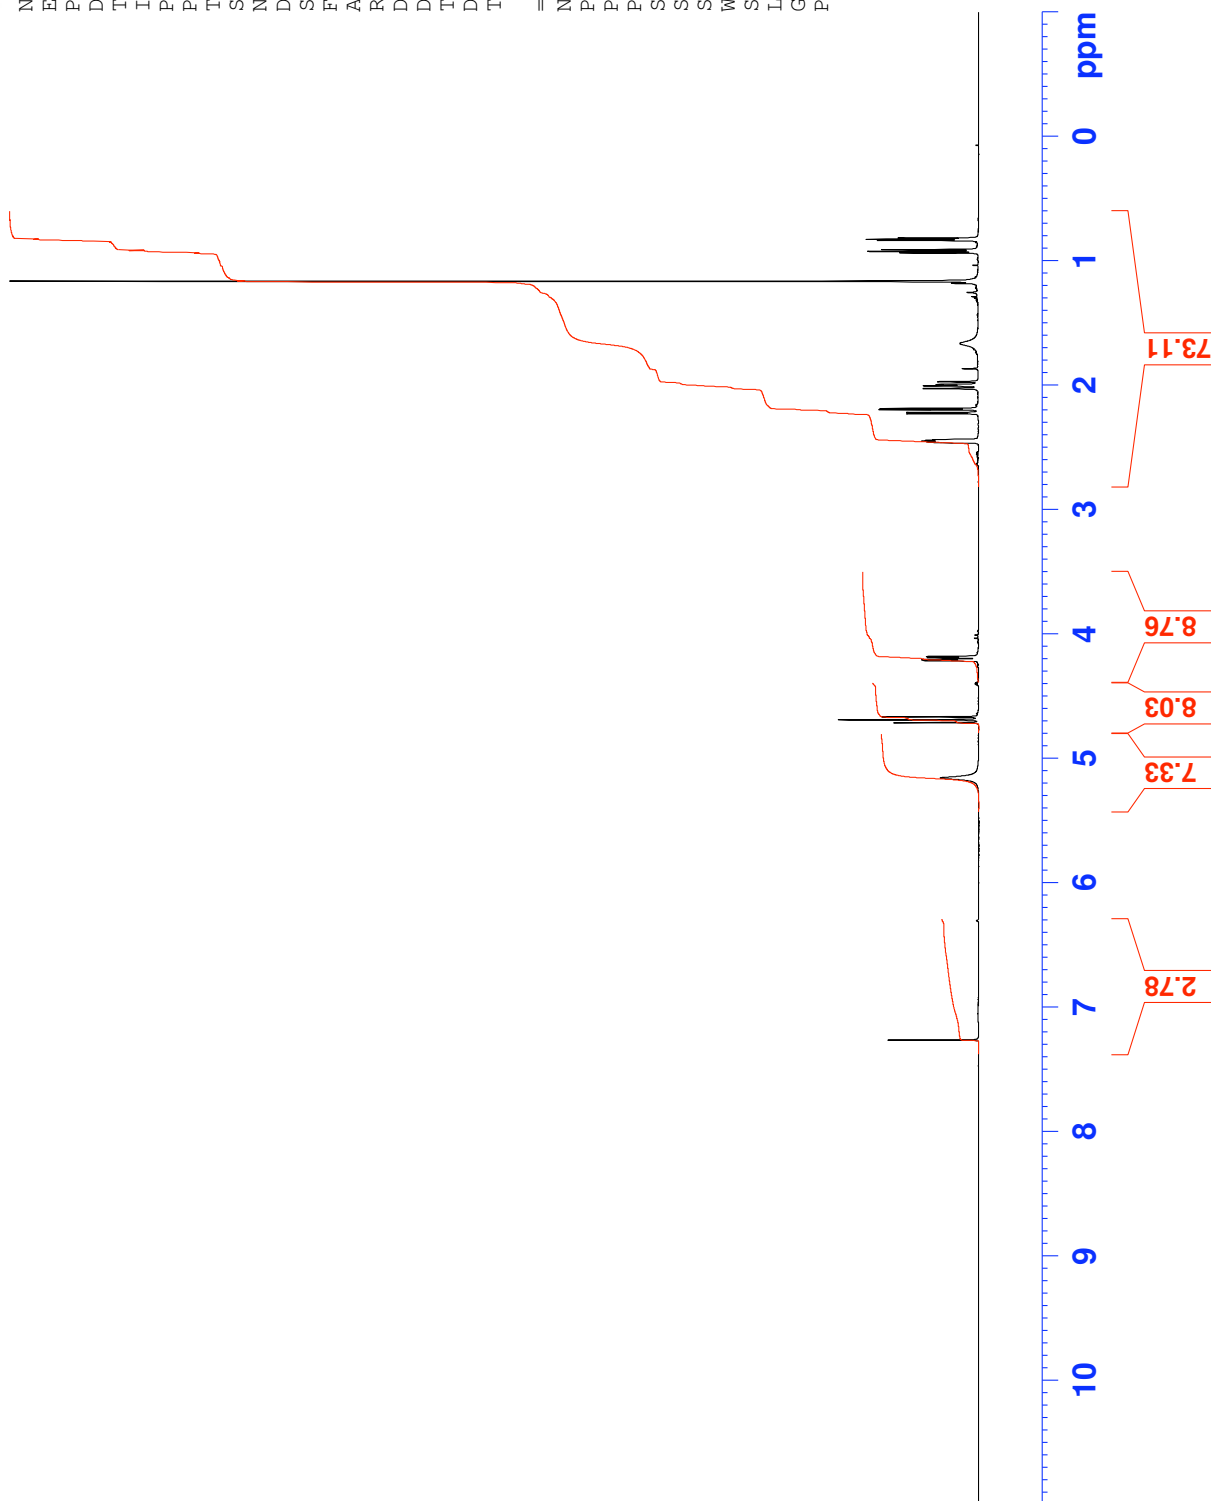

Instrument AVC500  
GEORGE FEAST 5477 6/8/09

VMR@CHEM.OX

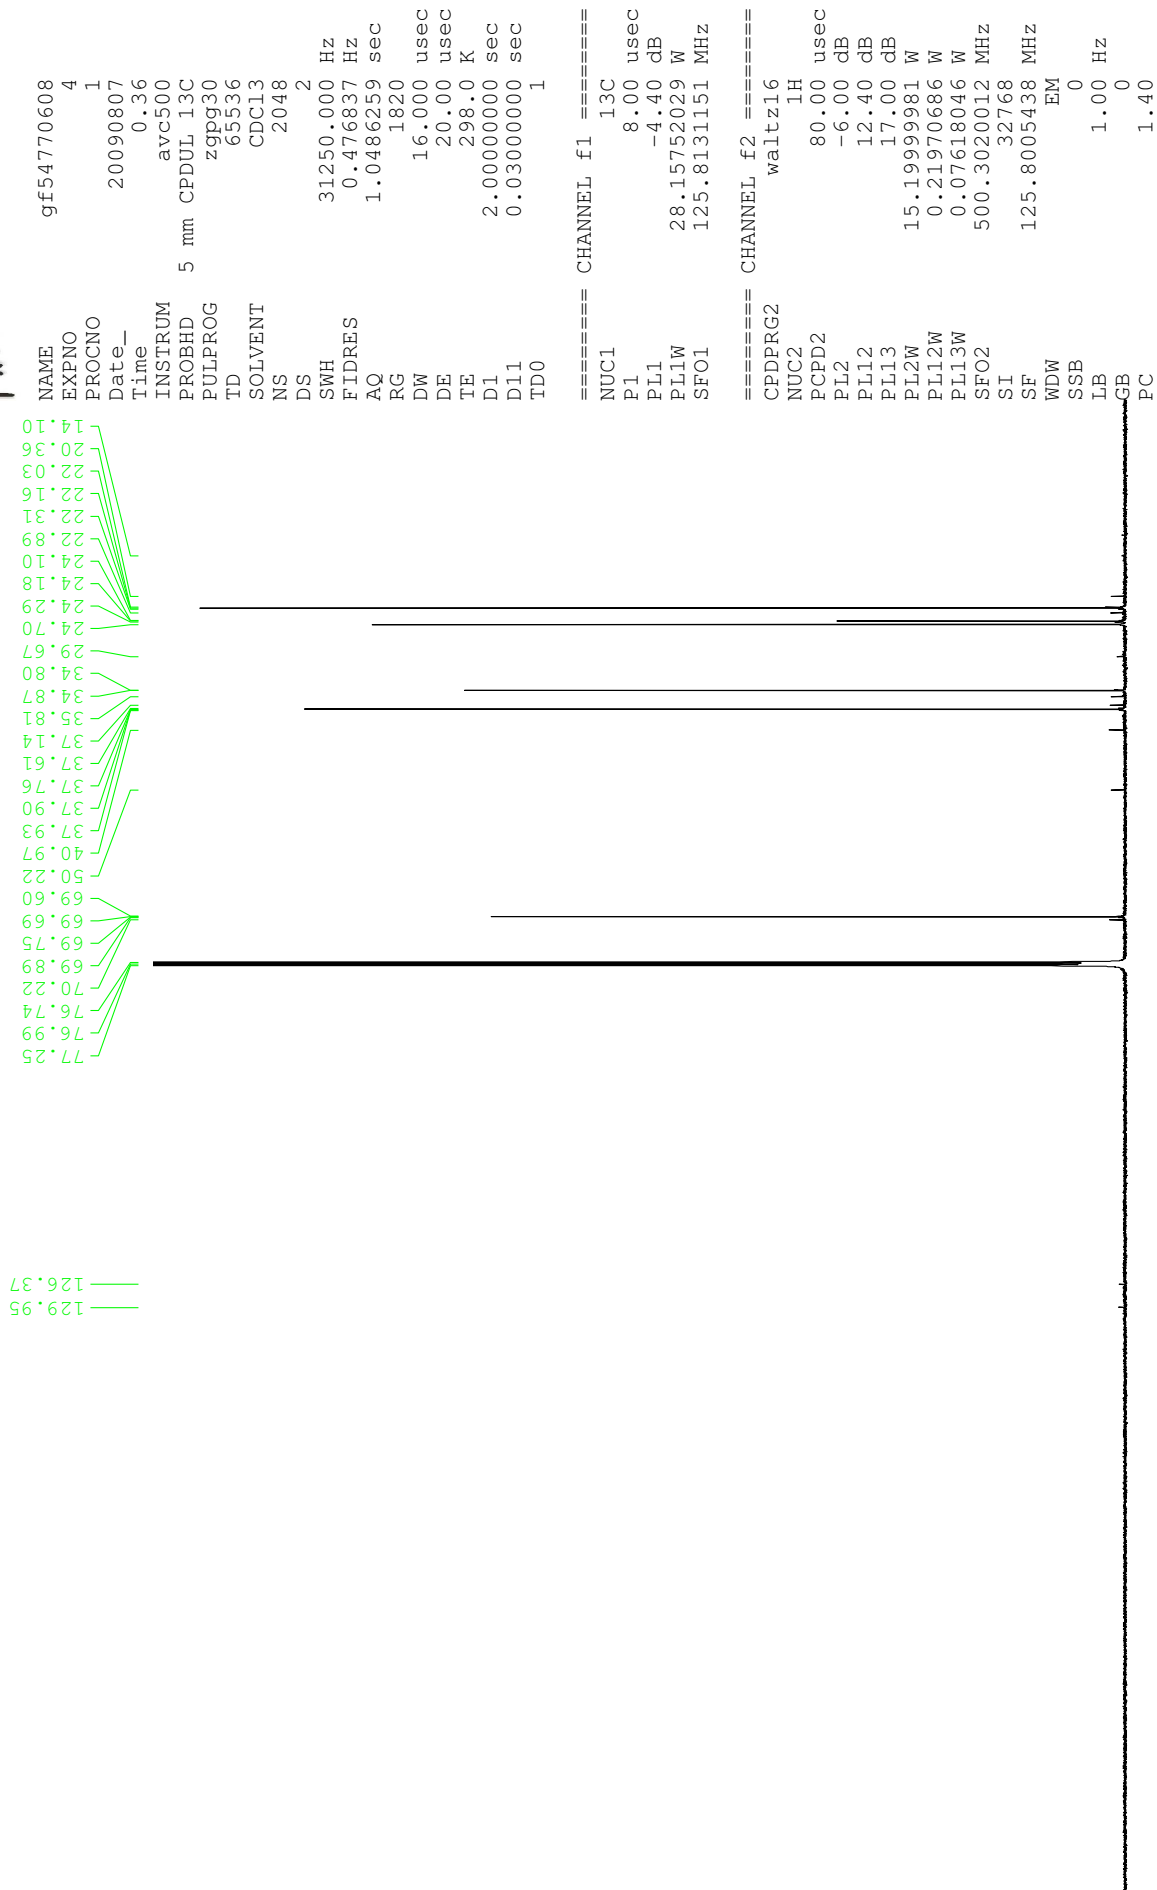

HNH117083  
 HNH117083  
 N11703-53-B3  
 CXF54252  
 Position: 50, ..., Feast, George X

| Parameter                 | Value                                      |
|---------------------------|--------------------------------------------|
| 1 Origin                  | UXNMR, Bruker Analytische Messtechnik GmbH |
| 2 Owner                   | root                                       |
| 3 Spectrometer            | dpx400h                                    |
| 4 Solvent                 | CDCl3                                      |
| 5 Temperature             | 300.0                                      |
| 6 Pulse Sequence          | zgtheta                                    |
| 7 Number of Scans         | 32                                         |
| 8 Receiver Gain           | 181                                        |
| 9 Relaxation Delay        | 1.0000                                     |
| 10 Pulse Width            | 14.0000                                    |
| 11 Acquisition Time       | 4.0000                                     |
| 12 Acquisition Date       | 2009-06-29T19:08:00                        |
| 13 Modification Date      | 2009-06-29T19:09:02                        |
| 14 Spectrometer Frequency | 400.18                                     |
| 15 Spectral Width         | 7183.9                                     |
| 16 Lowest Frequency       | -590.6                                     |
| 17 Nucleus                | <sup>1</sup> H                             |
| 18 Acquired Size          | 28735                                      |
| 19 Spectral Size          | 65536                                      |

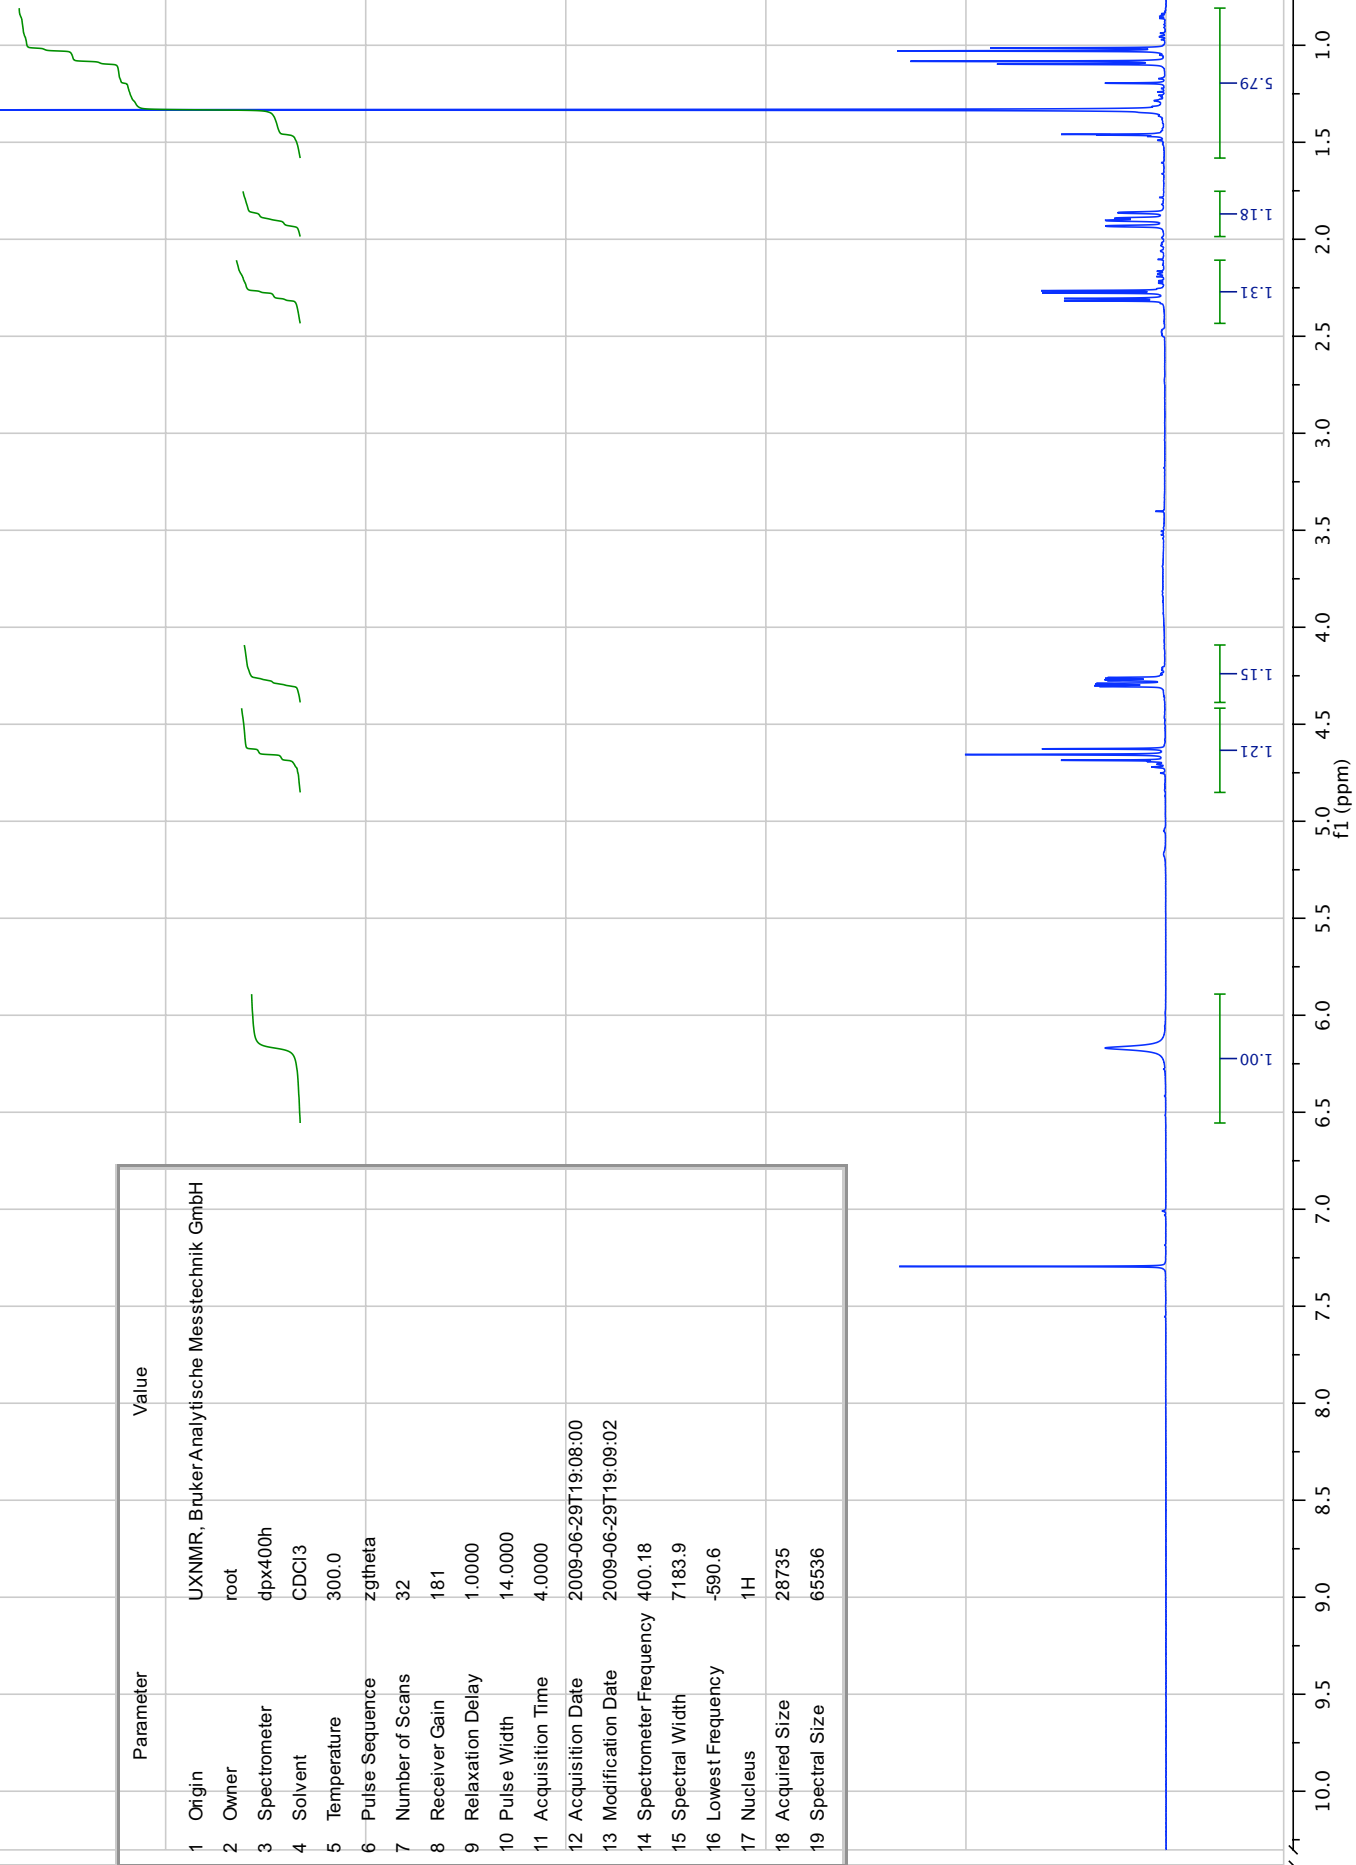

H1-(28)

HNH117083  
 HNH117083  
 N11703-53-B3  
 CXF54252  
 Position: 50, ..., Feast, George X

| Parameter                 | Value                                      |
|---------------------------|--------------------------------------------|
| 1 Origin                  | UXNMR, Bruker Analytische Messtechnik GmbH |
| 2 Owner                   | root                                       |
| 3 Spectrometer            | dpx400h                                    |
| 4 Solvent                 | CDCl3                                      |
| 5 Temperature             | 300.0                                      |
| 6 Pulse Sequence          | zgpgtheta                                  |
| 7 Number of Scans         | 3200                                       |
| 8 Receiver Gain           | 575                                        |
| 9 Relaxation Delay        | 1.0000                                     |
| 10 Pulse Width            | 10.0000                                    |
| 11 Acquisition Time       | 1.5000                                     |
| 12 Acquisition Date       | 2009-06-29T21:26:00                        |
| 13 Modification Date      | 2009-06-29T21:26:56                        |
| 14 Spectrometer Frequency | 100.64                                     |
| 15 Spectral Width         | 24154.6                                    |
| 16 Lowest Frequency       | -1008.5                                    |
| 17 Nucleus                | <sup>13</sup> C                            |
| 18 Acquired Size          | 36230                                      |
| 19 Spectral Size          | 131072                                     |

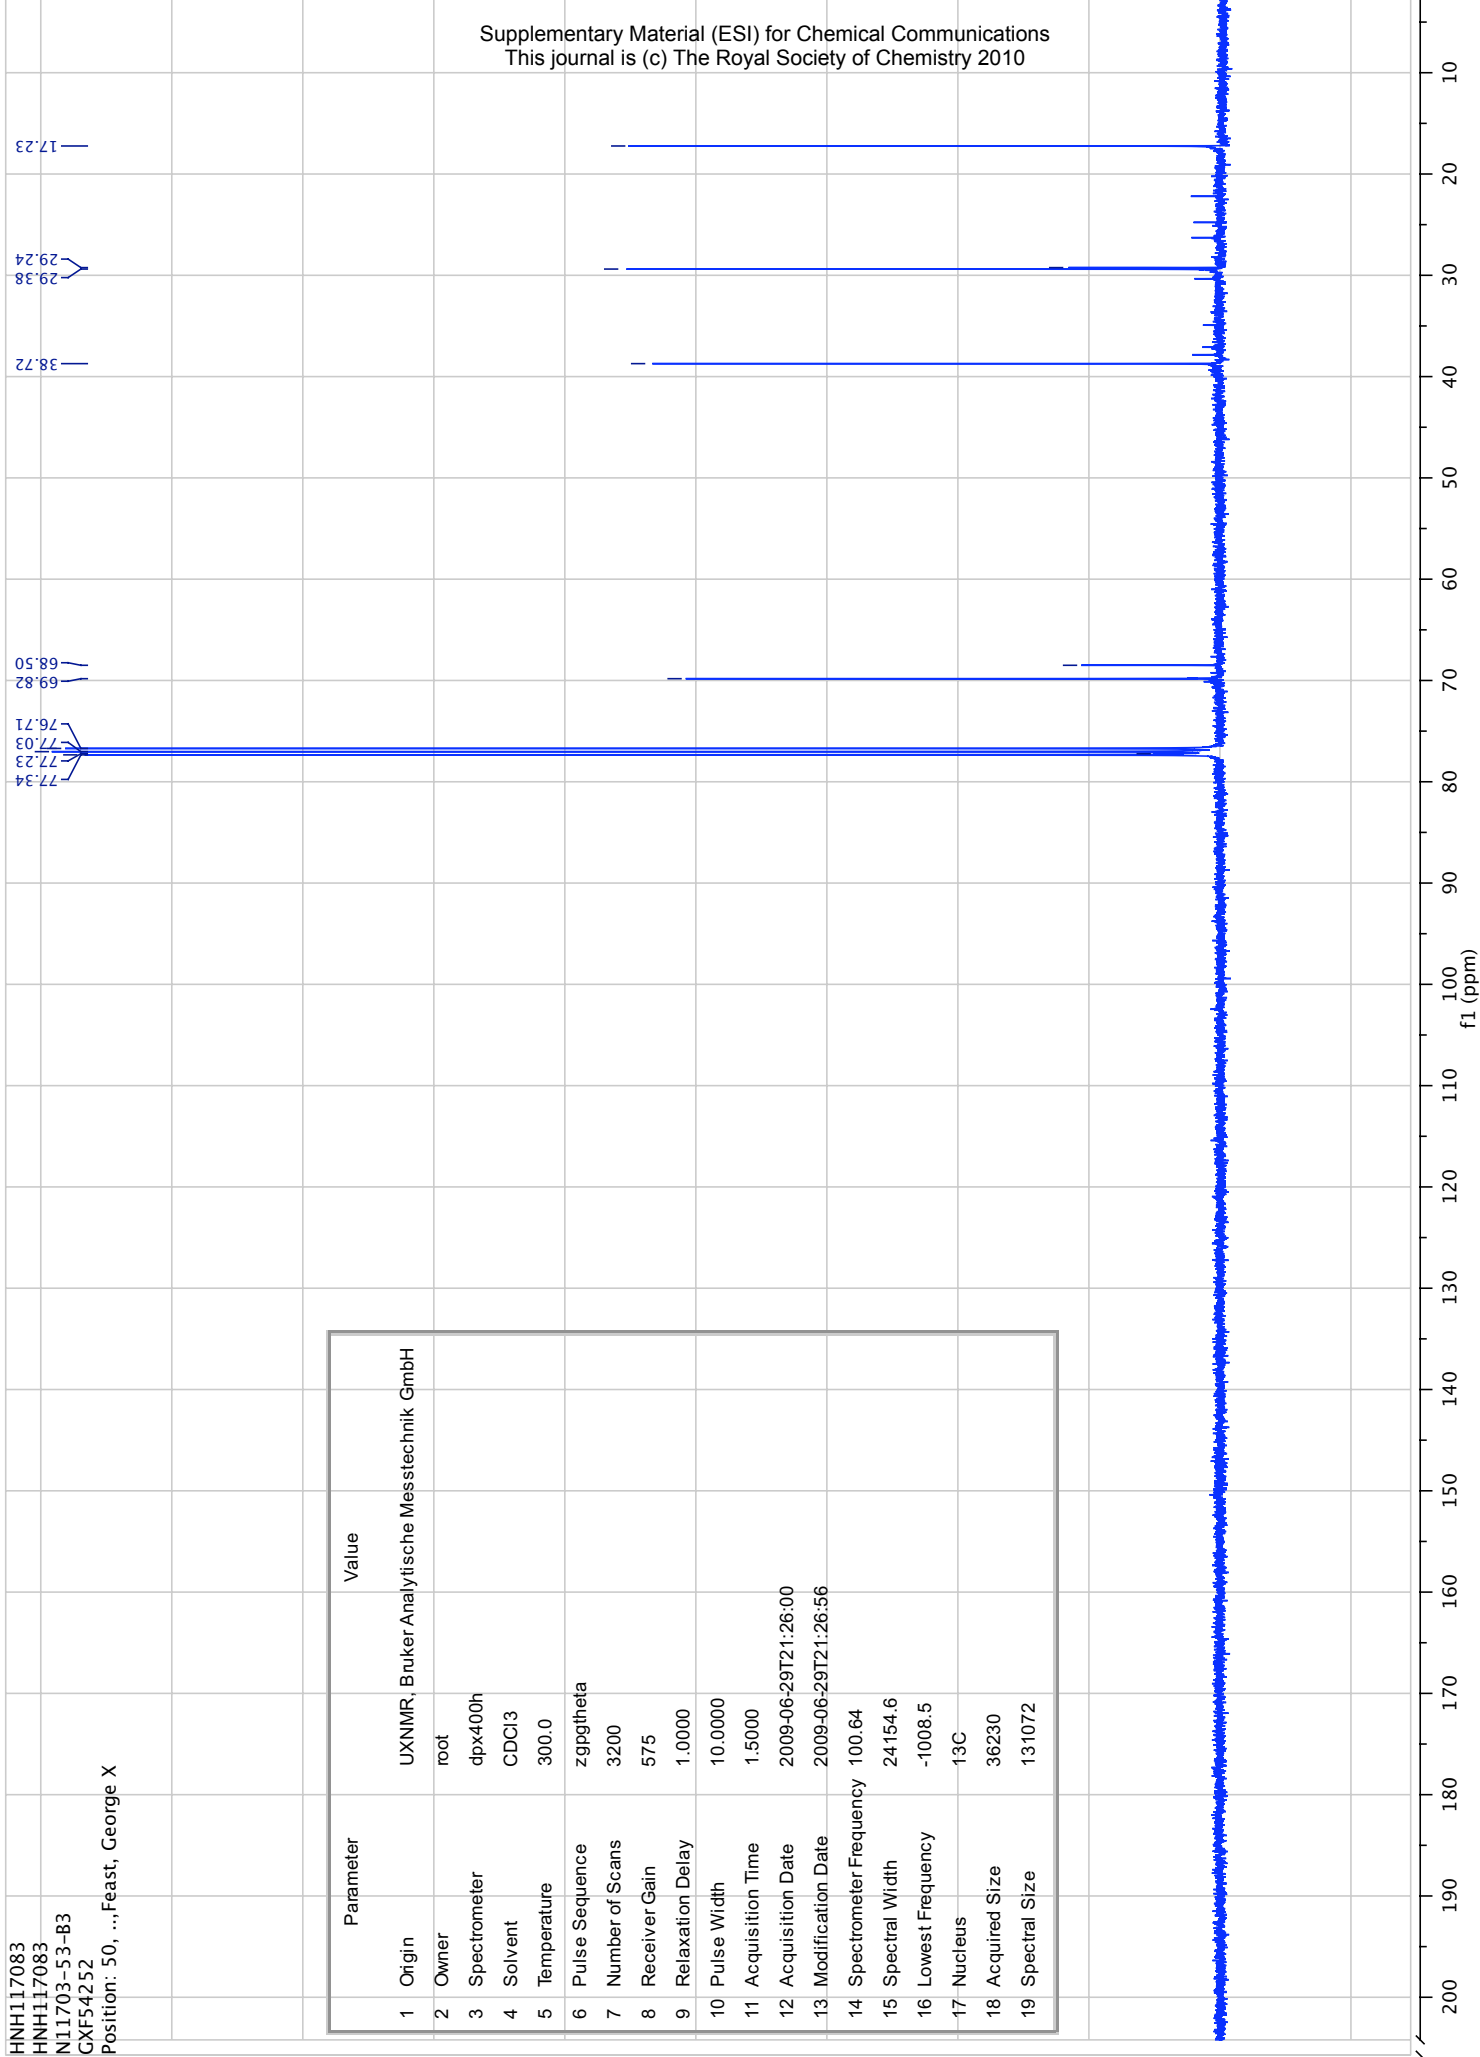

HNH116639  
HNH116639  
N11703-36-B2  
CXF54252  
Position: 26, ..., Feast, George X

| Parameter                 | Value                                      |
|---------------------------|--------------------------------------------|
| 1 Origin                  | UXNMR, Bruker Analytische Messtechnik GmbH |
| 2 Owner                   | root                                       |
| 3 Spectrometer            | dpx400h                                    |
| 4 Solvent                 | CDCl3                                      |
| 5 Temperature             | 300.0                                      |
| 6 Pulse Sequence          | zgtheta                                    |
| 7 Number of Scans         | 32                                         |
| 8 Receiver Gain           | 181                                        |
| 9 Relaxation Delay        | 1.0000                                     |
| 10 Pulse Width            | 14.0000                                    |
| 11 Acquisition Time       | 4.0000                                     |
| 12 Acquisition Date       | 2009-06-08T22:20:00                        |
| 13 Modification Date      | 2009-06-08T22:20:48                        |
| 14 Spectrometer Frequency | 400.18                                     |
| 15 Spectral Width         | 7183.9                                     |
| 16 Lowest Frequency       | -590.6                                     |
| 17 Nucleus                | 1H                                         |
| 18 Acquired Size          | 28735                                      |
| 19 Spectral Size          | 65536                                      |

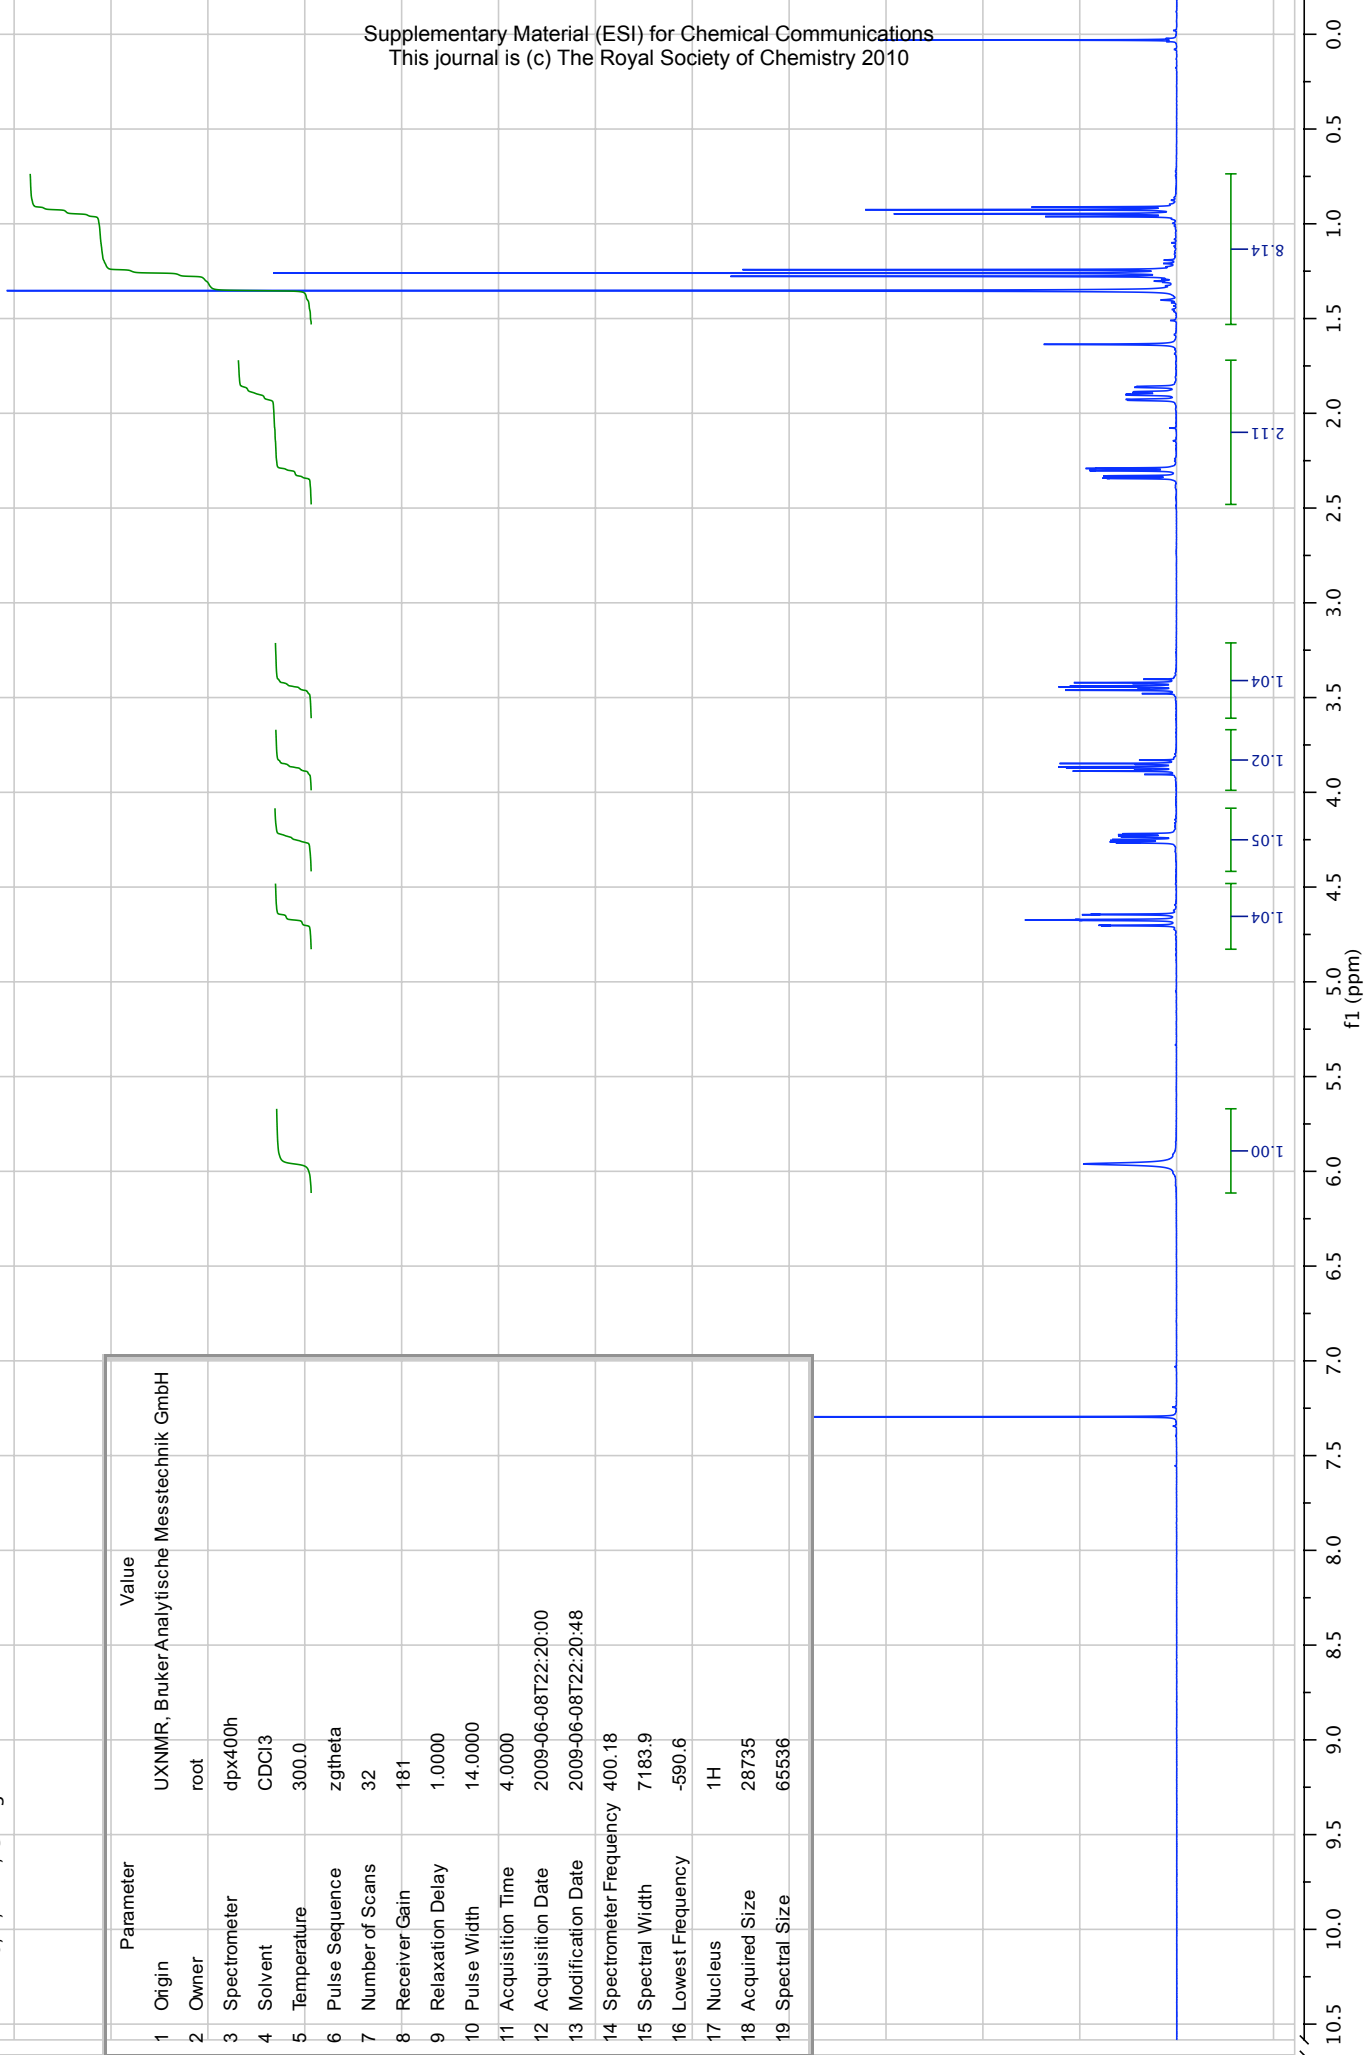

H1-(29)

HNH116639  
 HNH116639  
 N11703-36-B2  
 CXF54252  
 Position: 26, ...,ERROR

| Parameter                 | Value                                      |
|---------------------------|--------------------------------------------|
| 1 Origin                  | UXNMR, Bruker Analytische Messtechnik GmbH |
| 2 Owner                   | root                                       |
| 3 Spectrometer            | dpx400h                                    |
| 4 Solvent                 | CDCl3                                      |
| 5 Temperature             | 300.0                                      |
| 6 Pulse Sequence          | zpggtheta                                  |
| 7 Number of Scans         | 3200                                       |
| 8 Receiver Gain           | 575                                        |
| 9 Relaxation Delay        | 1.0000                                     |
| 10 Pulse Width            | 10.0000                                    |
| 11 Acquisition Time       | 1.5000                                     |
| 12 Acquisition Date       | 2009-06-09T00:38:00                        |
| 13 Modification Date      | 2009-06-09T00:38:32                        |
| 14 Spectrometer Frequency | 100.64                                     |
| 15 Spectral Width         | 24154.6                                    |
| 16 Lowest Frequency       | -1008.5                                    |
| 17 Nucleus                | <sup>13</sup> C                            |
| 18 Acquired Size          | 36230                                      |
| 19 Spectral Size          | 131072                                     |

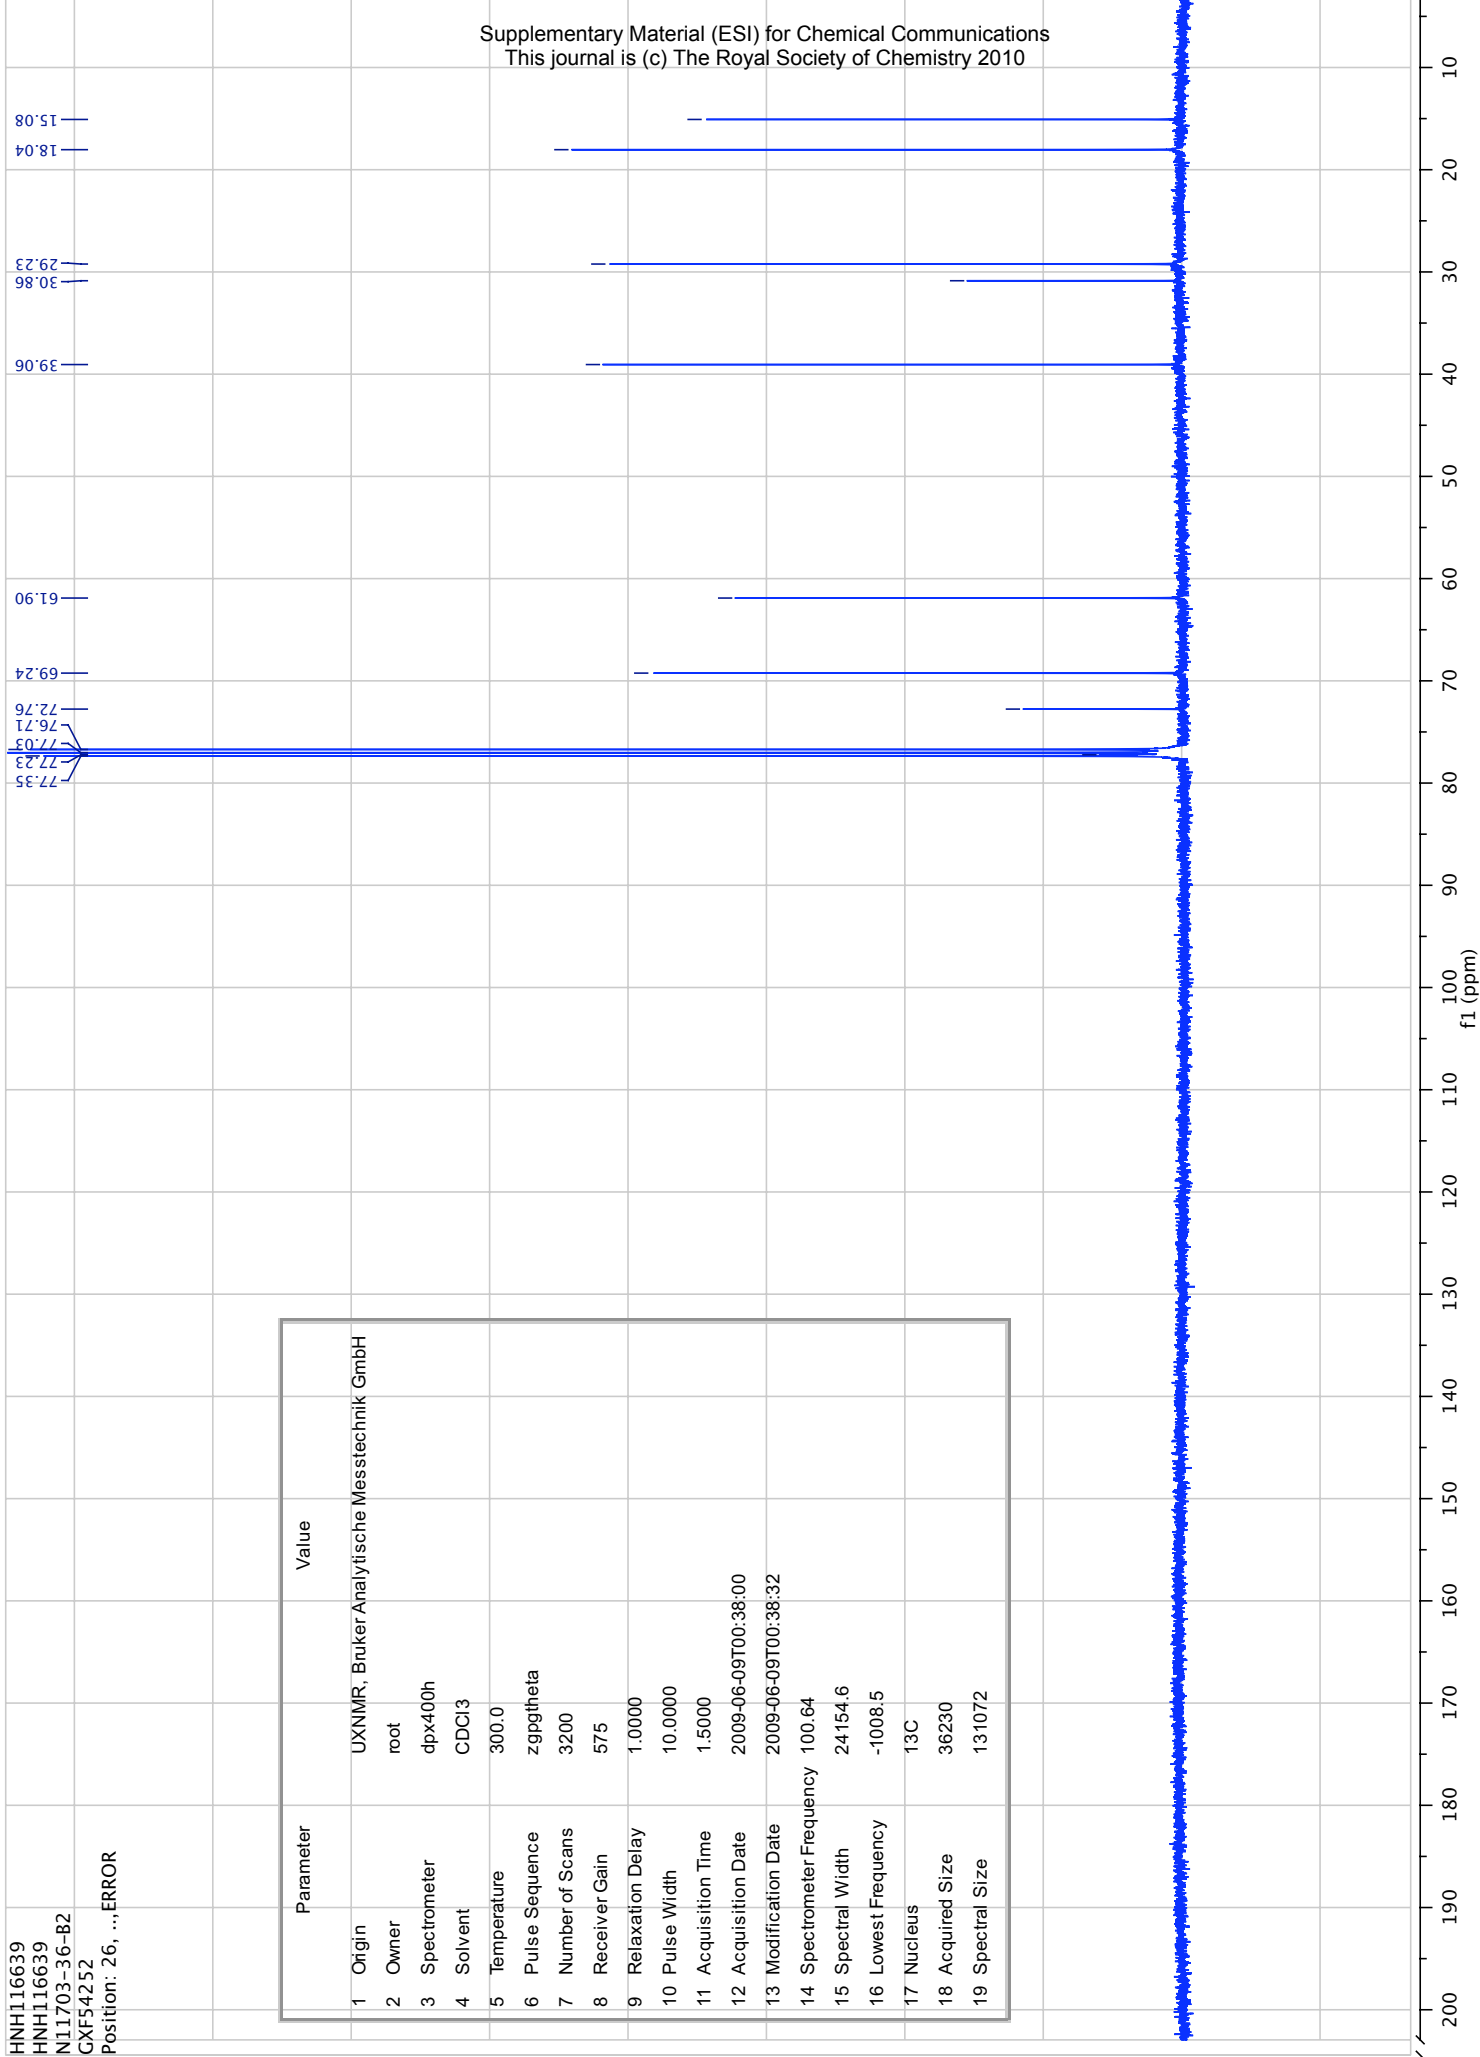

Instrument AVC500  
GEORGE FEAST 5574 13/8/09

NMR@CHEM.OX

```
NAME          9f555741308
EXPNO         1
PROCNO        1
Date_         20090813
Time          21.49
INSTRUM       avc500
PROBHD        5 mm CPDUL 13C
PULPROG       zg30
TD            65536
SOLVENT       CDCl3
NS            16
DS            2
SWH           10330.578 Hz
FIDRES        0.157632 Hz
AQ            3.1719923 sec
RG            4
DW            48.400 usec
DE            6.00 usec
TE            298.0 K
D1            1.00000000 sec
TD0           1

===== CHANNEL f1 =====
NUC1          1H
P1            9.60 usec
PL1          -6.00 dB
PL1W         15.19999981 W
SFO1         500.3030896 MHz
SI           32768
SF           500.3000240 MHz
WDW          EM
SSB          0
LB           0.30 Hz
GB           0
PC           1.00
```

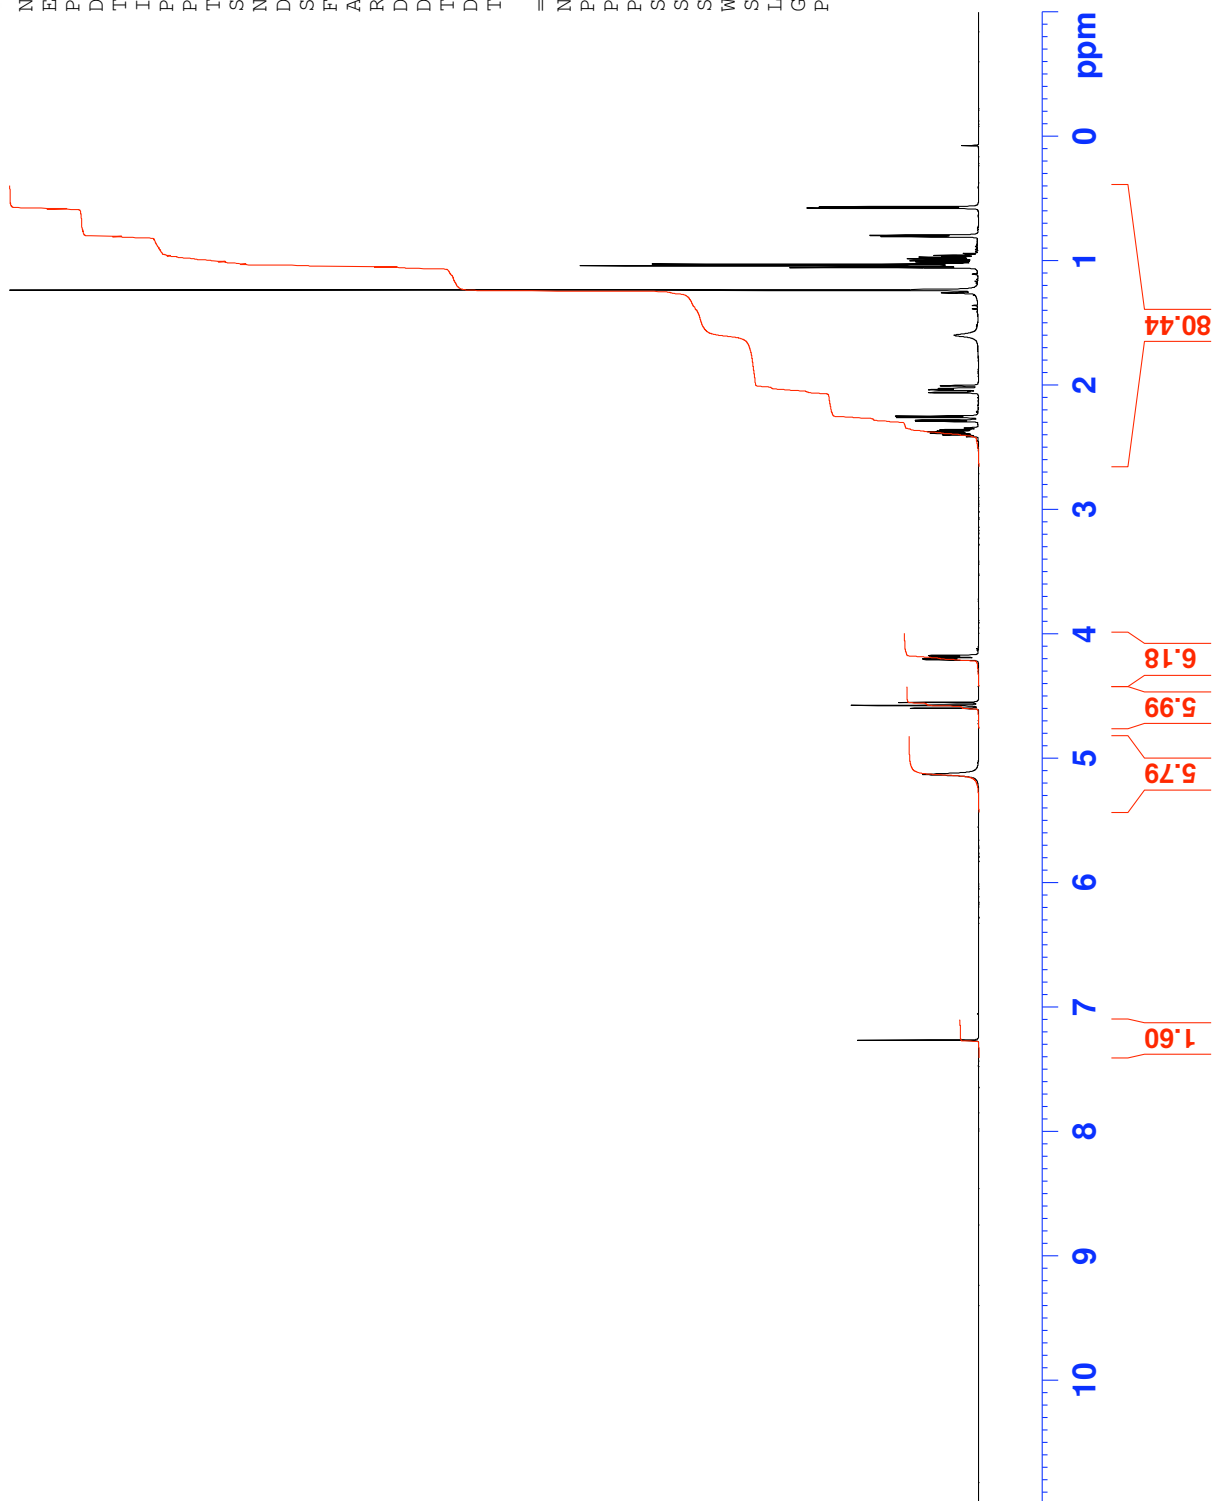

Instrument AVC500  
GEORGE FEAST 5574 13/8/09

VMR@CHEM.OX

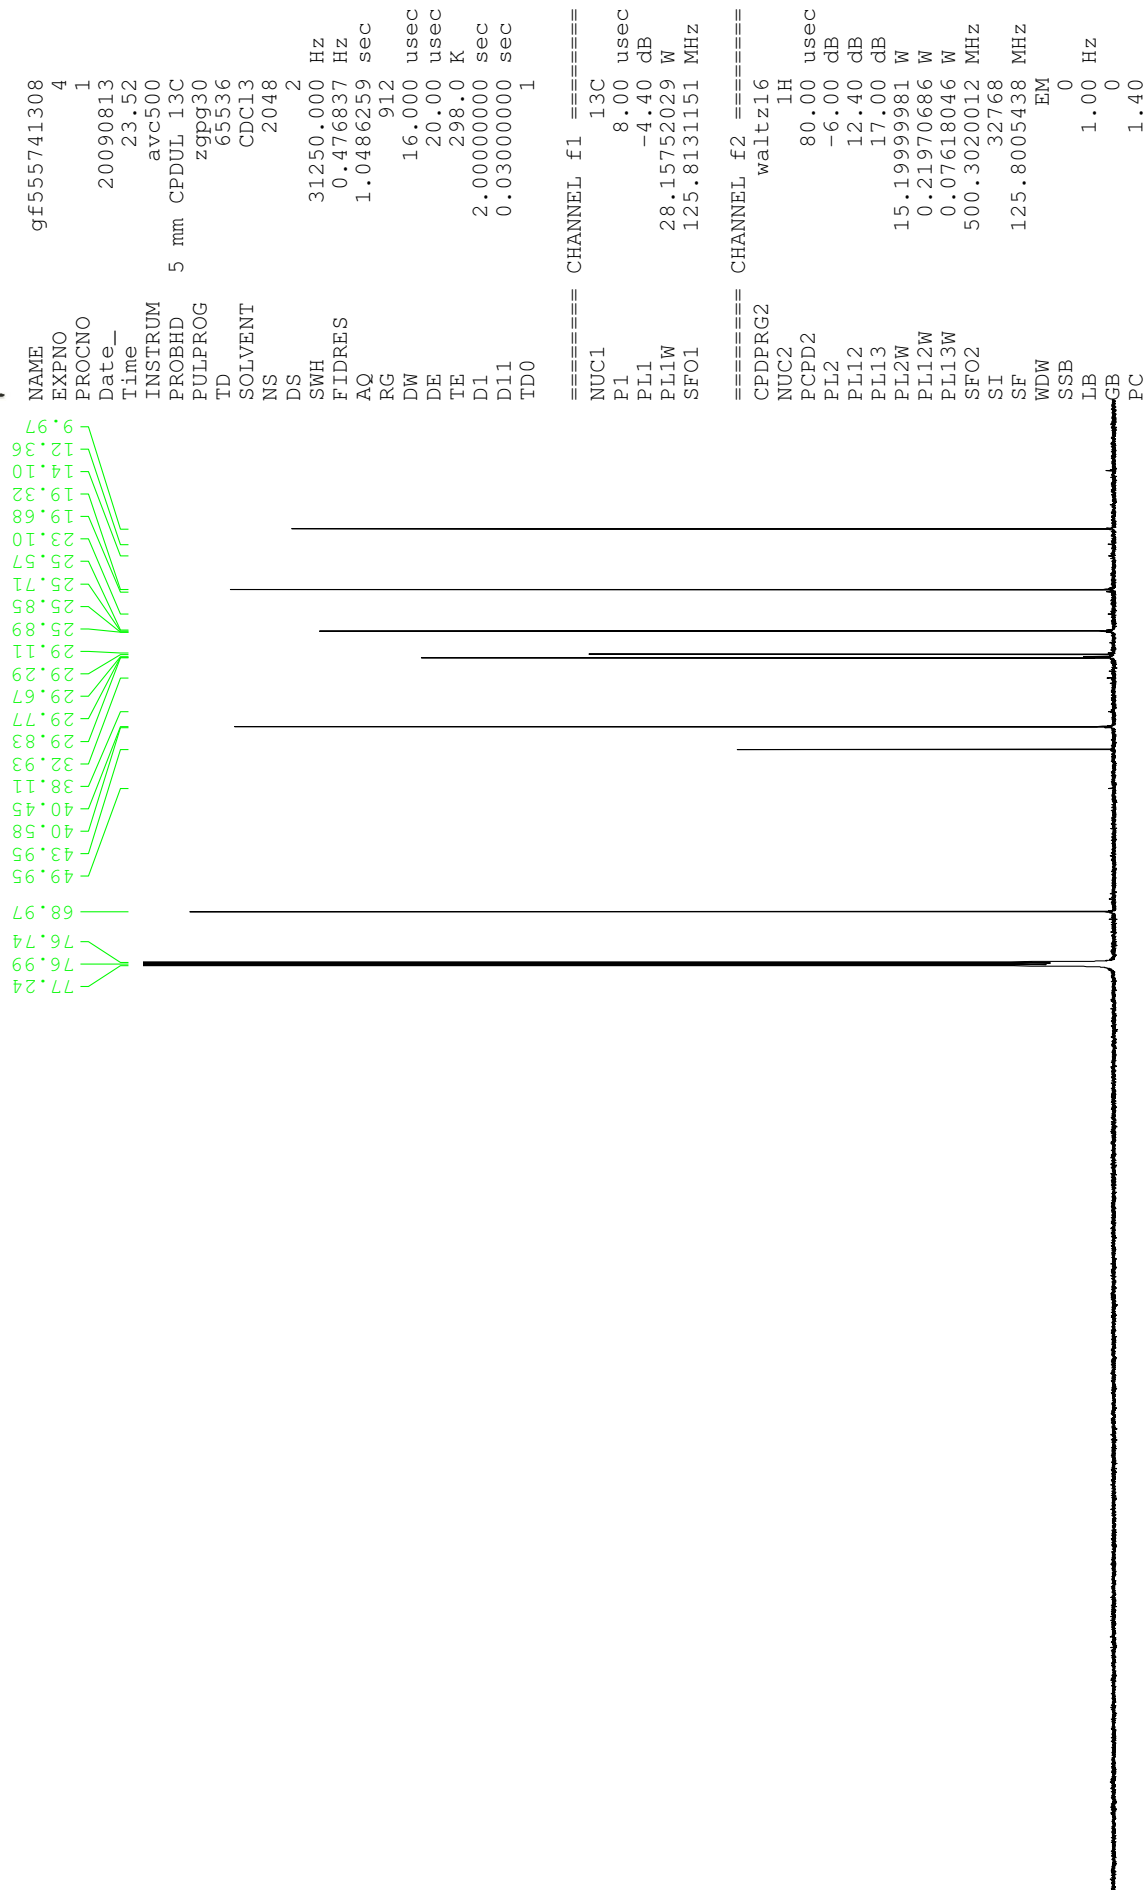



Instrument DQX400  
Chemist GCF  
Group JR  
4-66 F25-35  
h1 acq au CDC13 (C:\NMR1\jgrp\_11

NMR@CHEM.OX

2909.8  
2447.4  
2434.4  
2051.1  
1773.7  
1765.3  
1761.1  
1752.4  
1751.3  
1743.3  
1738.4  
1730.0  
1725.0  
1724.1  
1721.1  
1720.7  
1718.1  
1714.4  
1713.3  
1707.1  
1701.4  
1700.4  
1696.8  
1693.3  
1689.7  
1686.2  
1679.0  
1679.0  
1662.5  
1654.7  
1651.3  
1642.5  
1638.6  
1629.8  
1454.8  
1302.5  
1302.2  
978.3  
969.8  
962.0  
953.5  
936.5  
936.5  
935.6  
915.5  
914.5  
898.7  
875.0  
867.4  
850.6  
846.8  
843.1  
839.1  
830.4  
826.9  
822.8  
700.7  
693.8  
681.2  
593.1  
586.5  
566.0  
565.1  
558.8  
557.9  
551.7  
550.8  
544.2  
537.0  
536.1  
531.3  
530.3  
524.2  
523.1  
517.0  
516.2  
508.0  
507.1  
499.6  
495.0  
482.6  
481.6  
419.8  
350.7  
344.2  
280.4  
273.5  
263.9  
256.6

NAME Sep15-2009-11  
EXPNO 1  
PROCNO 1  
Date\_ 20090915  
Time 9.50  
INSTRUM av400  
PROBHD 5 mm QNP 1H/13  
PULPROG zg60  
TD 65536  
SOLVENT CDC13  
NS 16  
DS 2  
SWH 8278.146 Hz  
FIDRES 0.126314 Hz  
AQ 3.9584243 sec  
RG 90.5  
DW 60.400 usec  
DE 7.50 usec  
TE 300.0 K  
D1 1.0000000 sec

==== CHANNEL f1 =====  
NUC1 1H  
P1 9.00 usec  
PL1 0.00 dB  
SFO1 400.2024714 MHz  
SI 32768  
SF 400.2000028 MHz  
WDW EM  
SSB 0  
LB 0.30 Hz  
GB 0  
PC 1.00

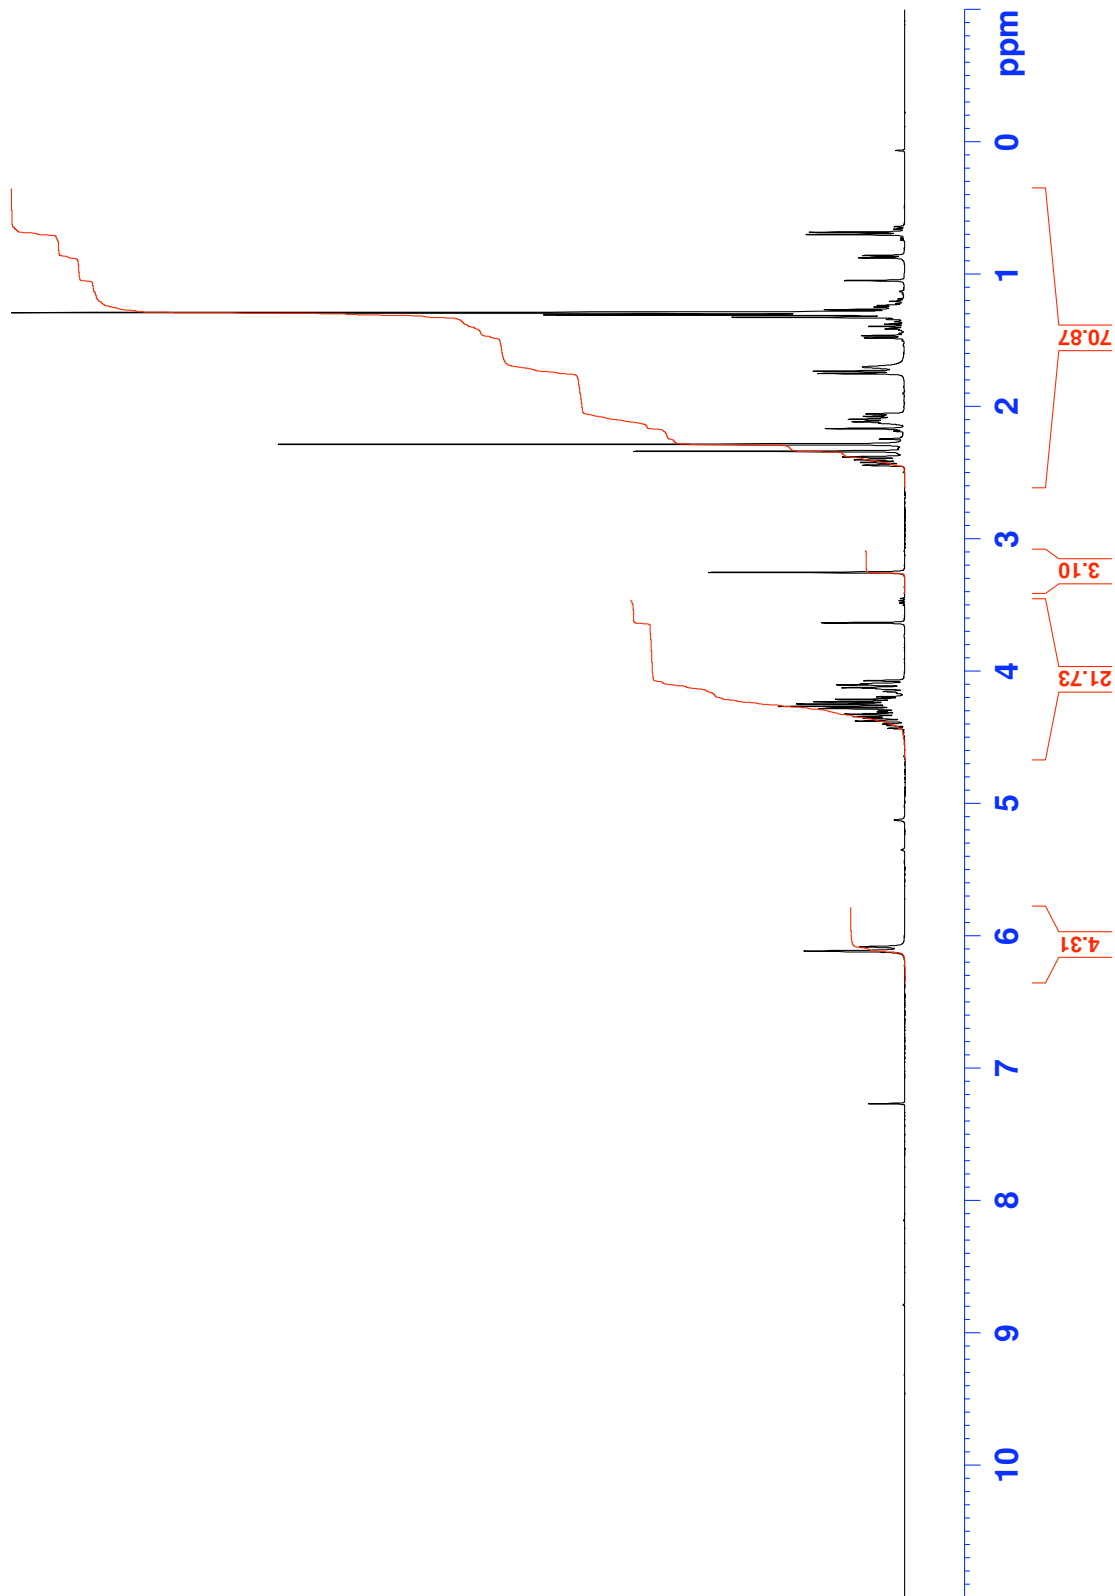

**NMR@CHEM.OX**

Sep15-2009-11  
NAME  
EXPNO 2  
PROCNO 1  
Date\_ 20090915  
Time 9.58  
INSTRUM av400  
PROBHD 5 mm QNP 1H/13  
PULPROG zgpg30  
TD 32768  
SOLVENT CDCl3  
NS 256  
DS 4  
SWH 26178.010 Hz  
FIDRES 0.798889 Hz  
AQ 0.6259188 sec  
RG 32768  
DW 19.100 usec  
DE 7.50 usec  
TE 300.0 K  
D1 1.00000000 sec  
D11 0.03000000 sec  
TD0 1  
===== CHANNEL f1 =====  
NUC1 13C  
P1 9.50 usec  
PL1 0.00 dB  
SFO1 100.6403931 MHz  
===== CHANNEL f2 =====  
CPDPRG2 waltz16  
NUC2 1H  
PCPD2 80.00 usec  
PL2 0.00 dB  
PL12 19.00 dB  
PL13 25.00 dB  
SFO2 400.2016008 MHz  
SI 32768  
SF 100.6303718 MHz  
WDW EM  
SSB 0  
LB 1.00 Hz  
GB 0  
PC 1.40

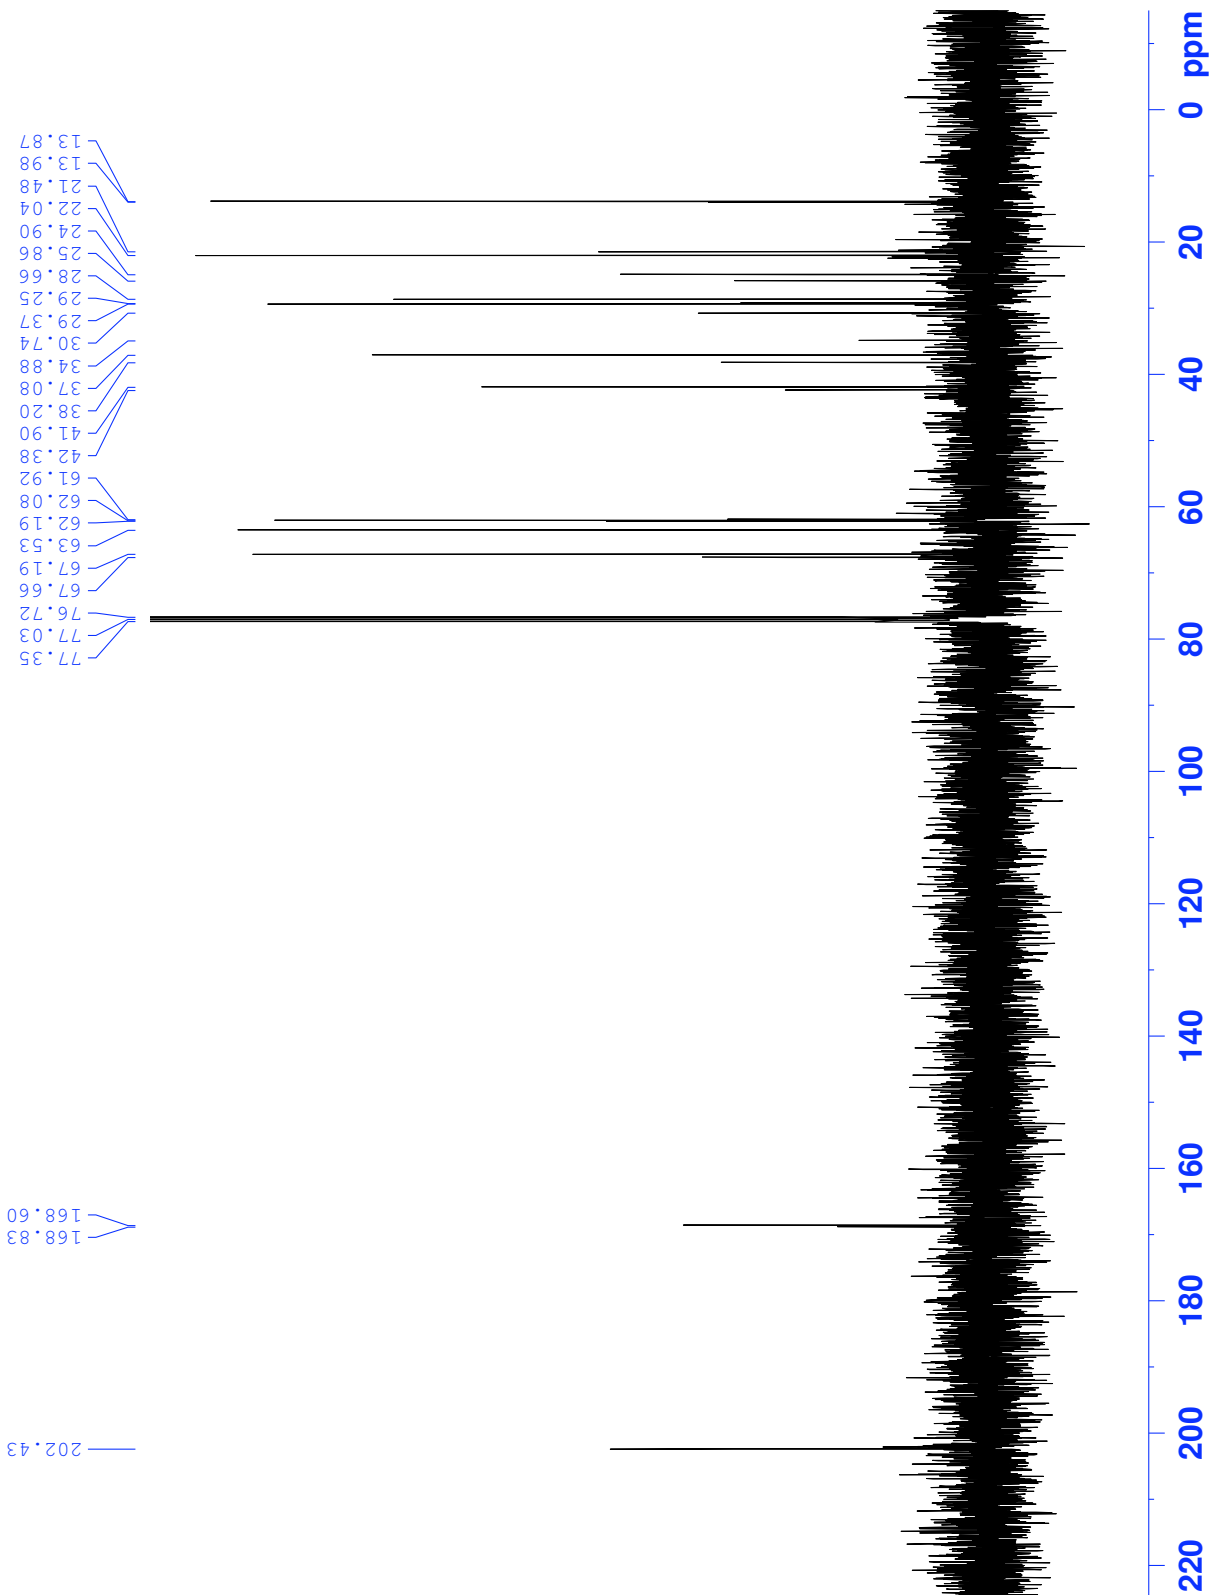

Instrument DQX400  
Chemist GCF  
Group JR  
4-66 F25-35  
c13acq.au CDCl3 {C:NMR} jrgp 11

Instrument AVC500  
6394 George Feast 27/10/09

NMR@CHEM.OX

```
NAME          gf63942710
EXPNO         1
PROCNO        1
Date_         20091027
Time          8.42
INSTRUM       avc500
PROBHD        5 mm CPDUL 13C
PULPROG       zg30
TD            65536
SOLVENT       CDCl3
NS            16
DS            2
SWH           10330.578 Hz
FIDRES        0.157632 Hz
AQ            3.1719923 sec
RG            4
DE            48.400 usec
TE            298.0 K
D1            1.00000000 sec
TD0           1

===== CHANNEL f1 =====
NUC1          1H
P1            9.60 usec
PL1          -6.00 dB
PL1W         15.19999981 W
SFO1         500.3030896 MHz
SI           32768
SF           500.3000240 MHz
WDW          EM
SSB          0
LB           0.30 Hz
GB           0
PC           1.00
```

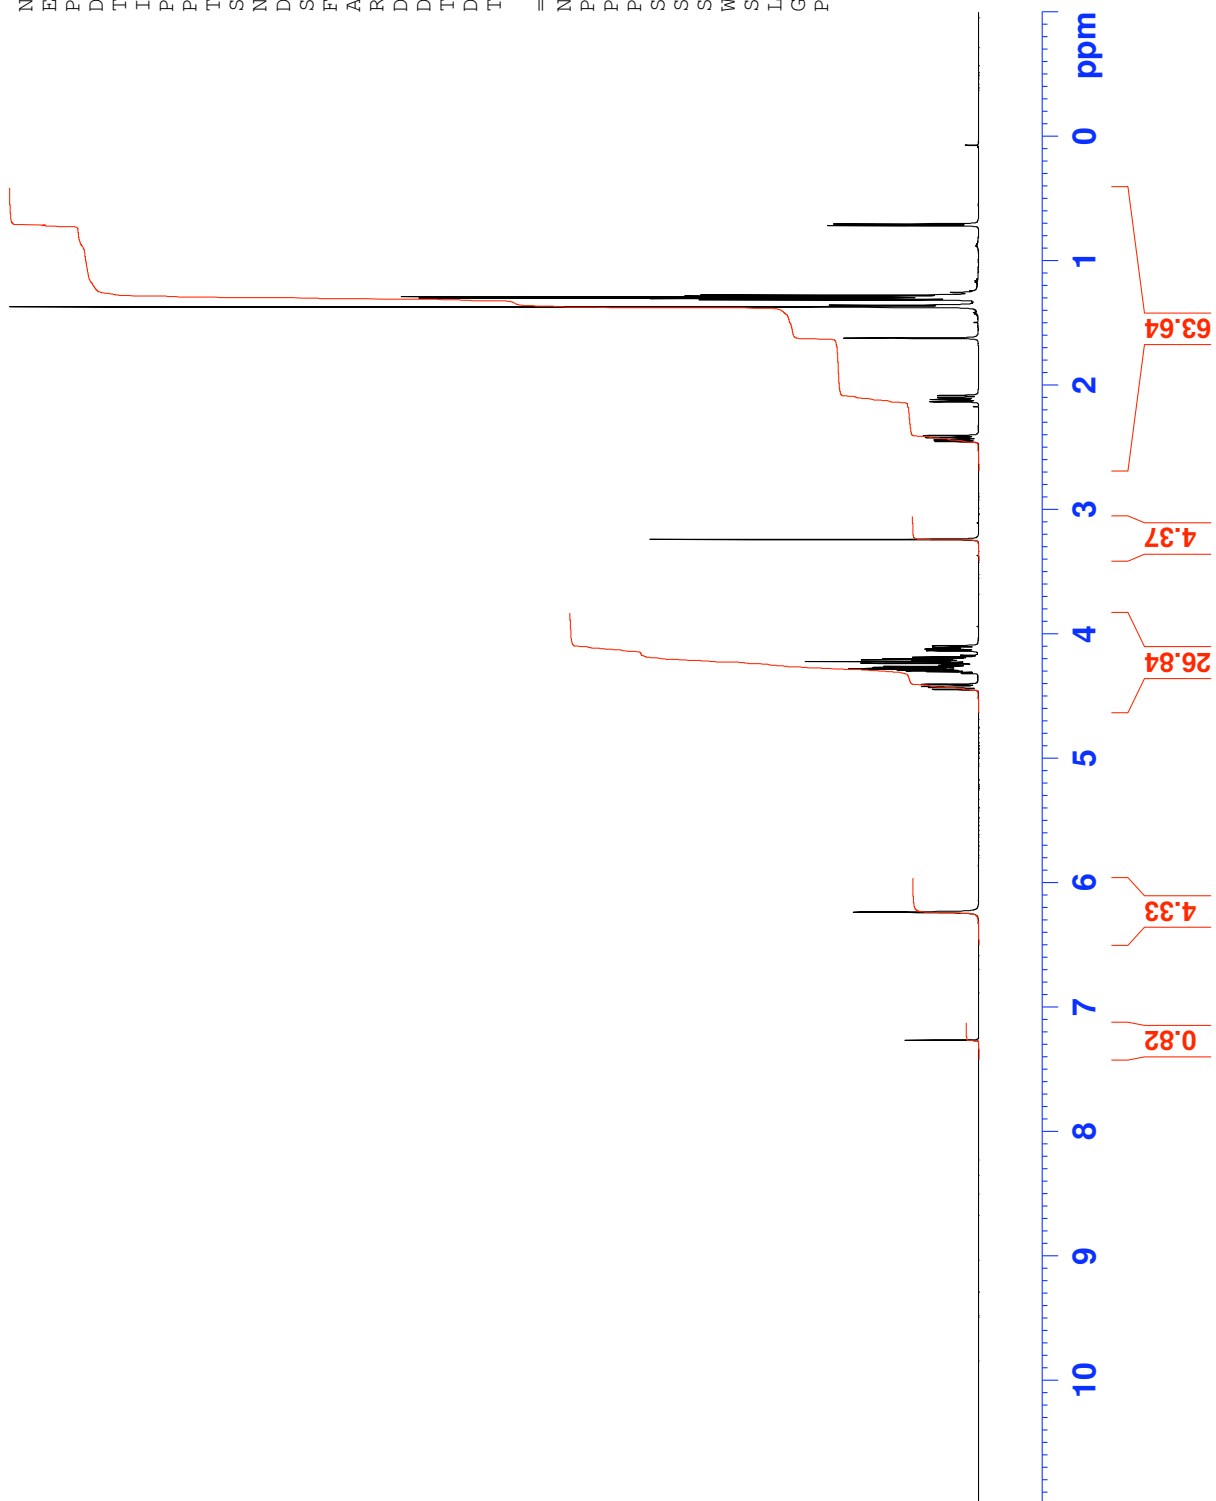

Instrument AVC500  
6394 George Feast 27/10/09

NMR@CHEM.OX

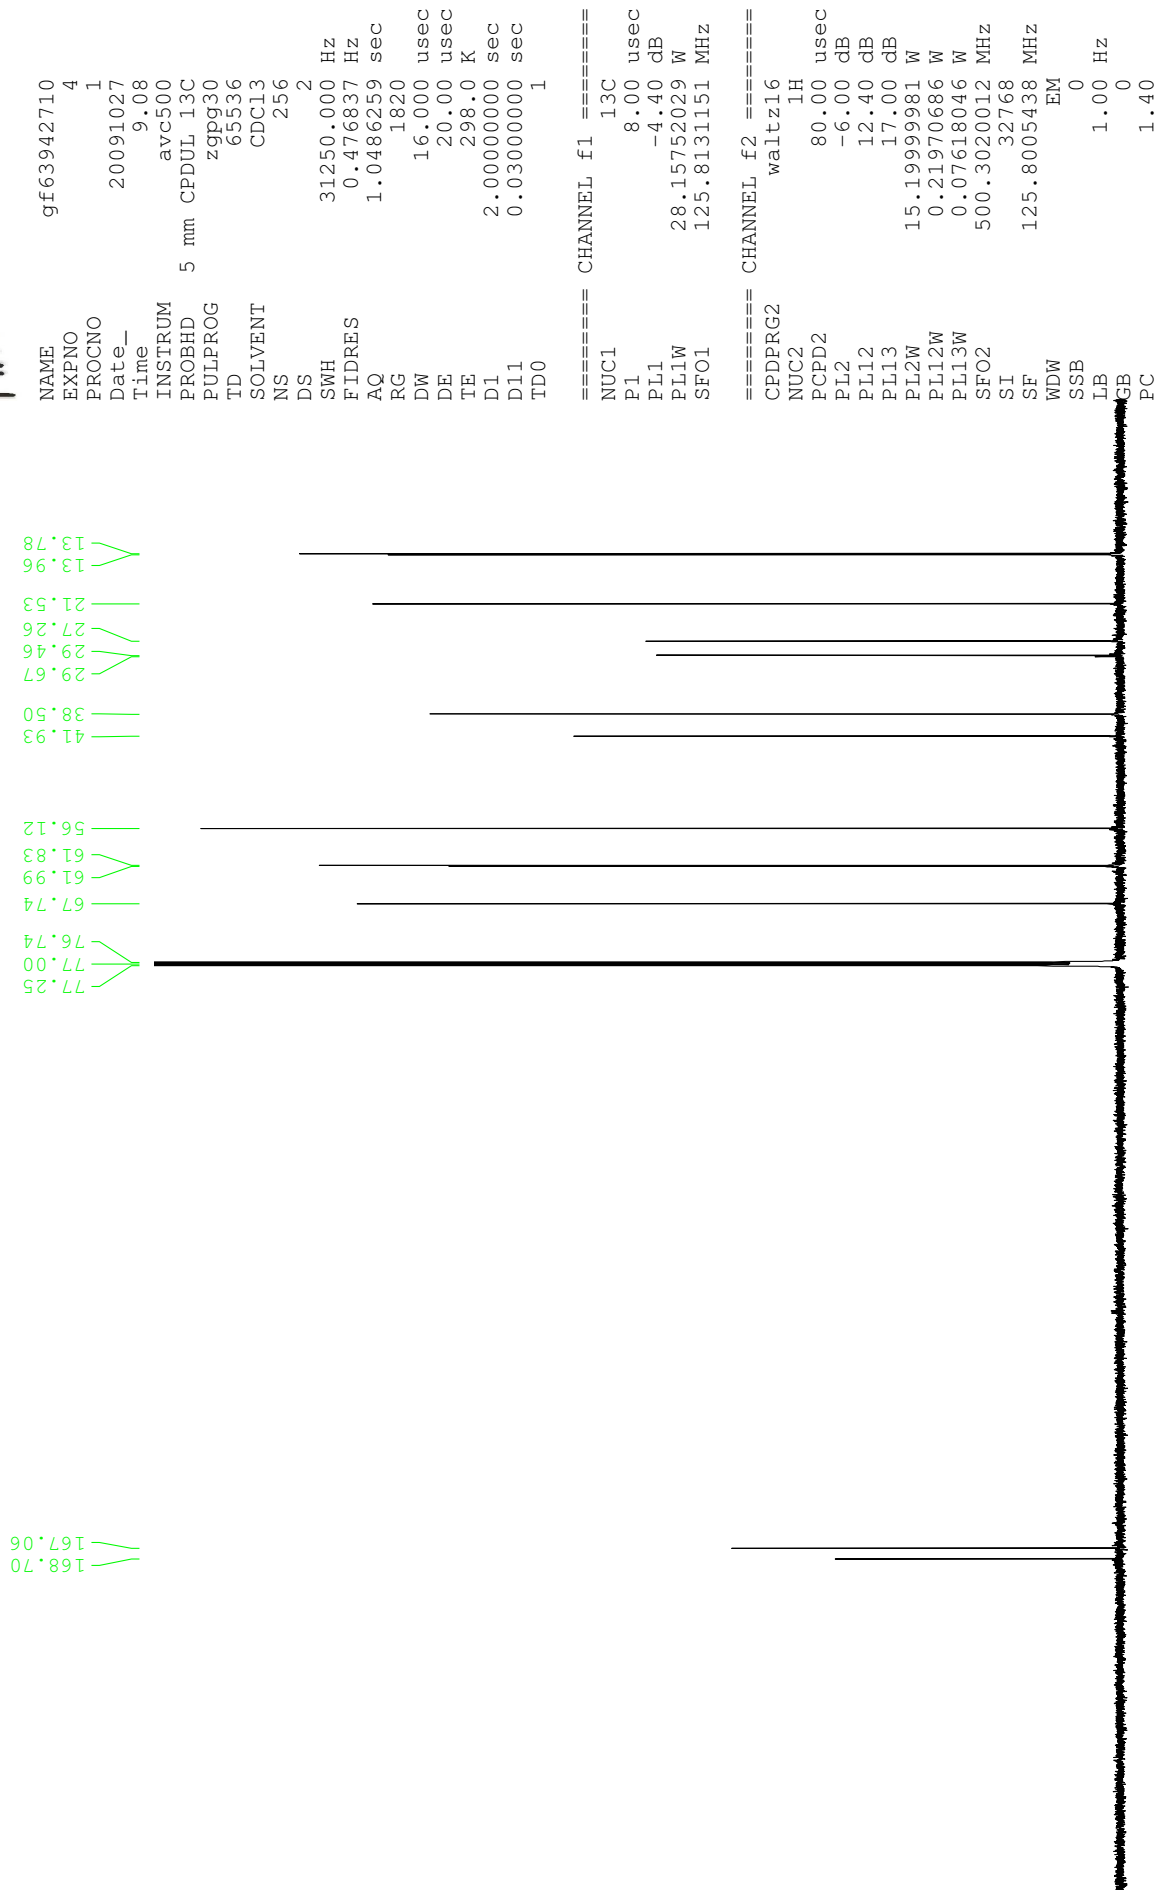

Supplement: b926179f.pdf [file b926179f.pdf]
